# Supplementary material for: Fast Amide Bond Cleavage Assisted by a Secondary Amino and a Carboxyl Group—A Model for yet Unknown Peptidases?
Source: MDPI journal article supplement (doi:10.3390/molecules24030572), 2019-02-05
Supplement: s1 [file s1]

# SUPPORTING INFORMATION

## Fast Amide Bond Cleavage Assisted by a Secondary Amino and a Carboxyl Group – a Model for yet Unknown Peptidases?

Igor V. Komarov<sup>1\*</sup>, Aleksandr Yu. Ishchenko<sup>2</sup>, Aleksandr Hovtvianitsa<sup>2</sup>, Viacheslav Stepanenko<sup>2</sup>, Serhii Kharchenko<sup>2</sup>, John E. Davies<sup>3</sup>, Andrew D. Bond<sup>3</sup>, and Anthony J. Kirby<sup>3,\*</sup>

<sup>1</sup> Taras Shevchenko National University of Kyiv, Institute of High Technologies, Vul. Volodymyrska 64/13, 01601 Kyiv, Ukraine; ik214@yahoo.com

<sup>2</sup> Enamine Ltd., Vul. Chervonotkatska 78, 02094 Kyiv, Ukraine; igor.komarov@enamine.net

<sup>3</sup> University Chemical Laboratory, University of Cambridge, Lensfield Road, CB2 1EW Cambridge, UK; ajk1@cam.ac.uk

\* Correspondence: ajk1@cam.ac.uk; ik214@yahoo.com

### Table of content

|                                                                                                                                   |         |
|-----------------------------------------------------------------------------------------------------------------------------------|---------|
| NMR spectra and chromato-mass traces for the compounds described in the main text.....                                            | S2-S37  |
| Kinetic data on the hydrolysis of 2HCl in different buffers.....                                                                  | S38-S49 |
| Representative <sup>1</sup> H-NMR data set used for estimation of the kinetic isotope effect of the 2HCl hydrolysis reaction..... | S50-S51 |

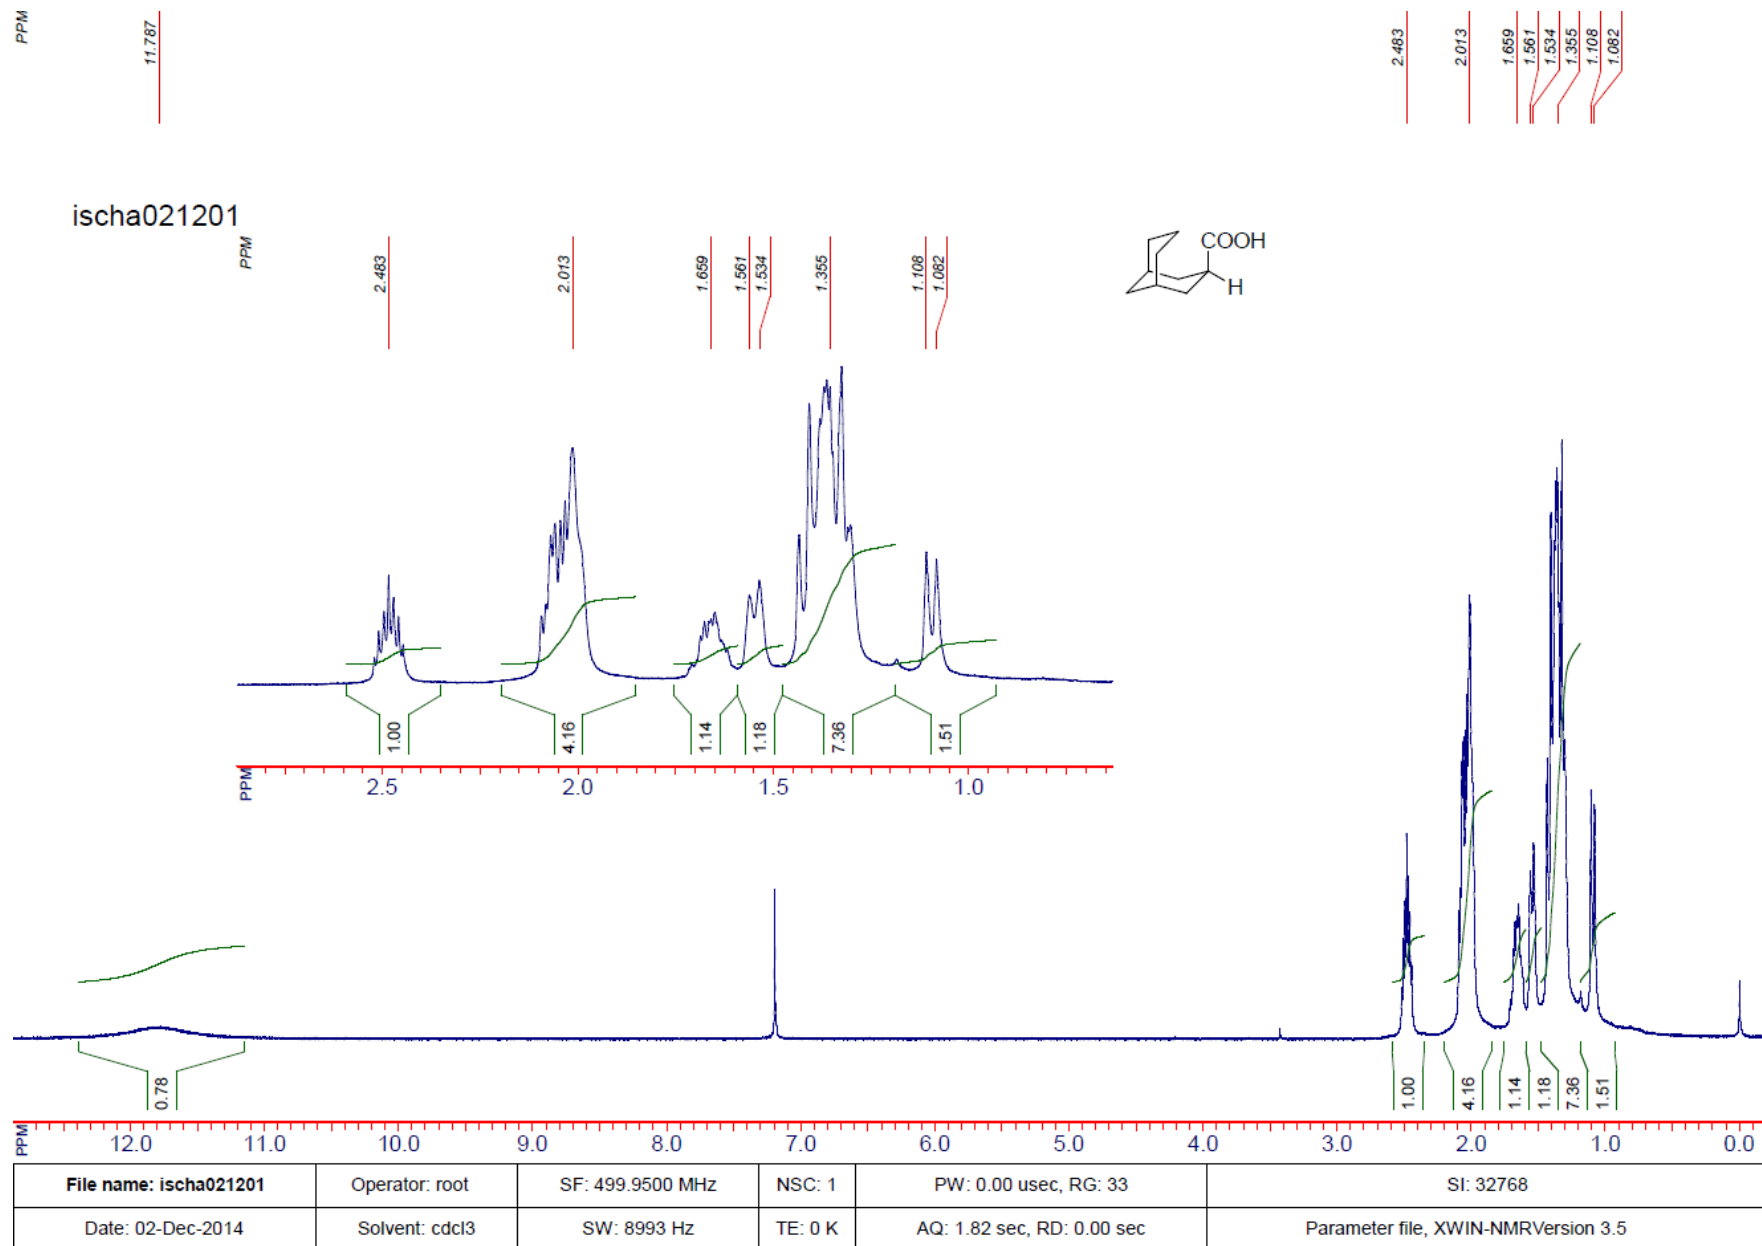

Figure S1.  $^1\text{H}$ -NMR spectrum of compound 20.

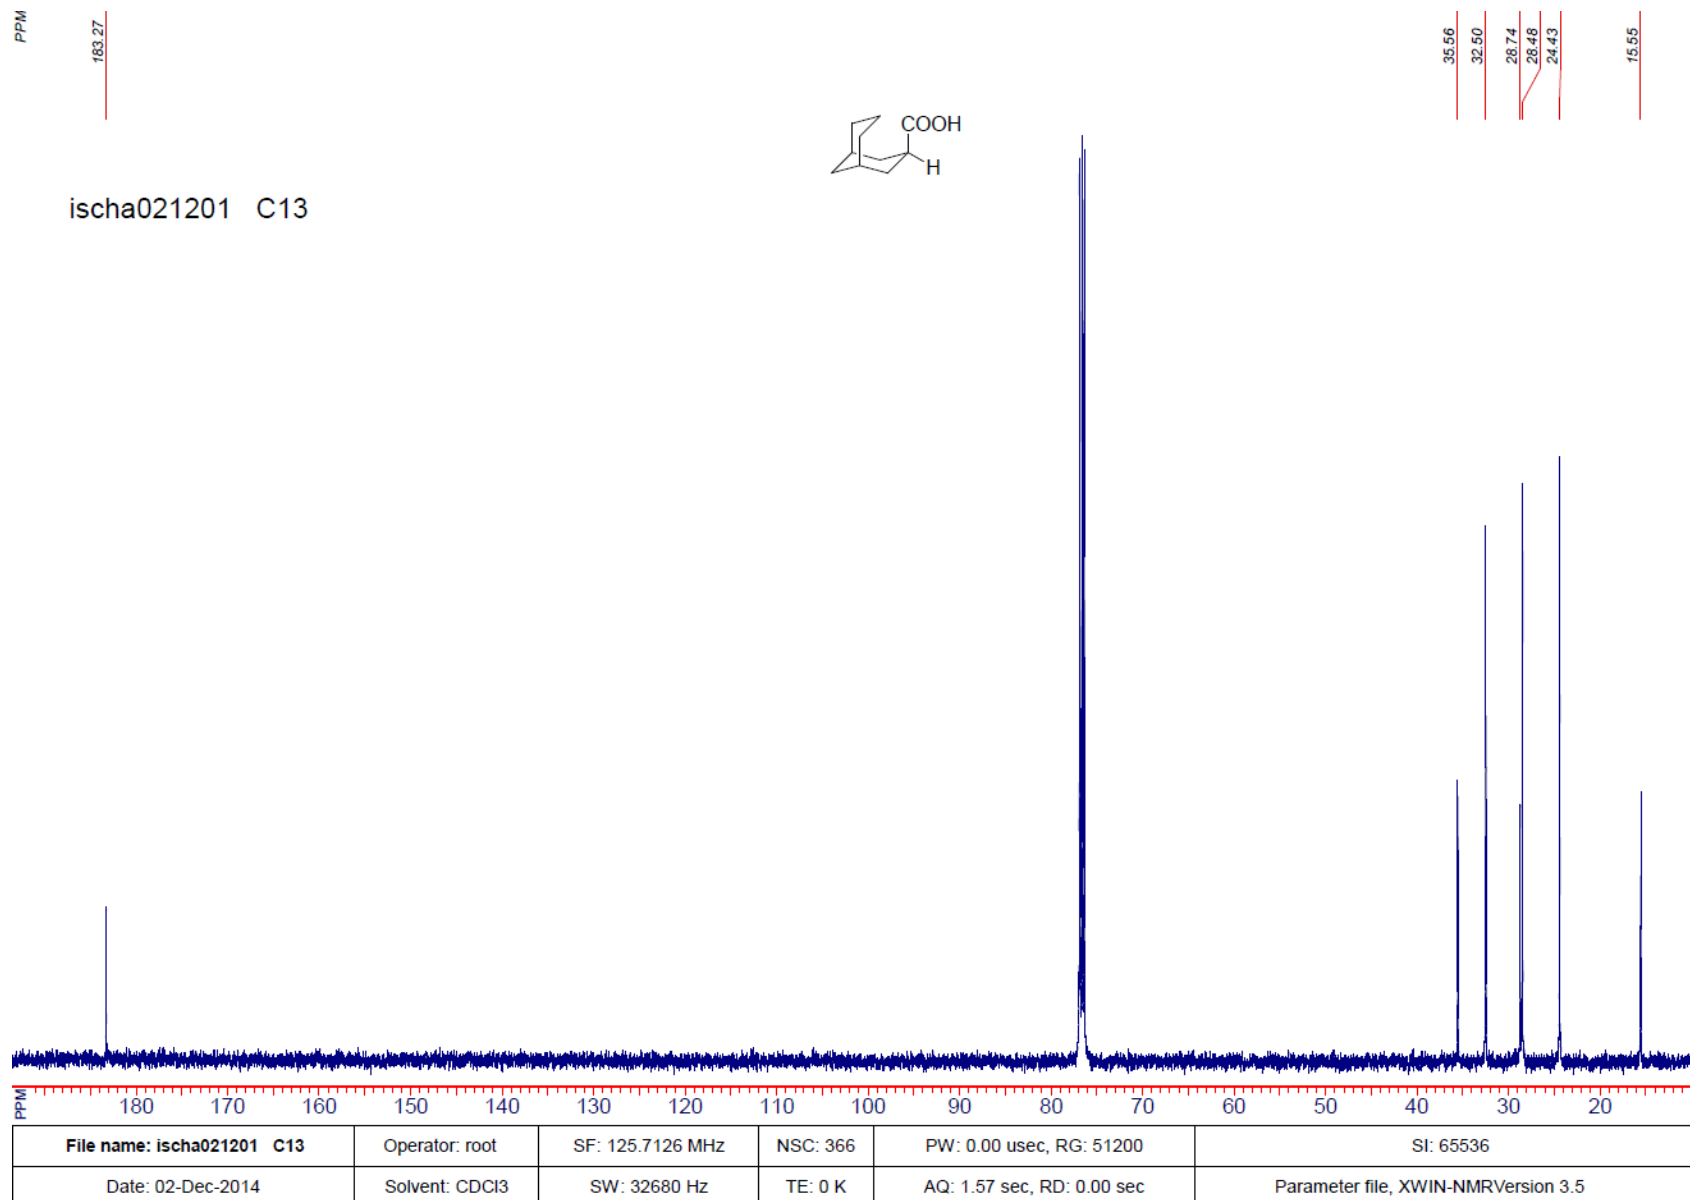

Figure S2.  $^{13}\text{C}$ -NMR spectrum of compound 20.

Data Path : C:\msdchem\1\data\11\_12\  
Data File : CLN22363.D  
Acq On : 12 Nov 2014 12:54  
Operator :  
Sample : CLN22363  
Misc : CH3OH  
ALS Vial : 42 Sample Multiplier: 1

Search Libraries: C:\Database\EMPTY.L Minimum Quality: 0

Unknown Spectrum: Apex  
Integration Events: ChemStation Integrator - autoint1.e

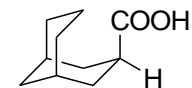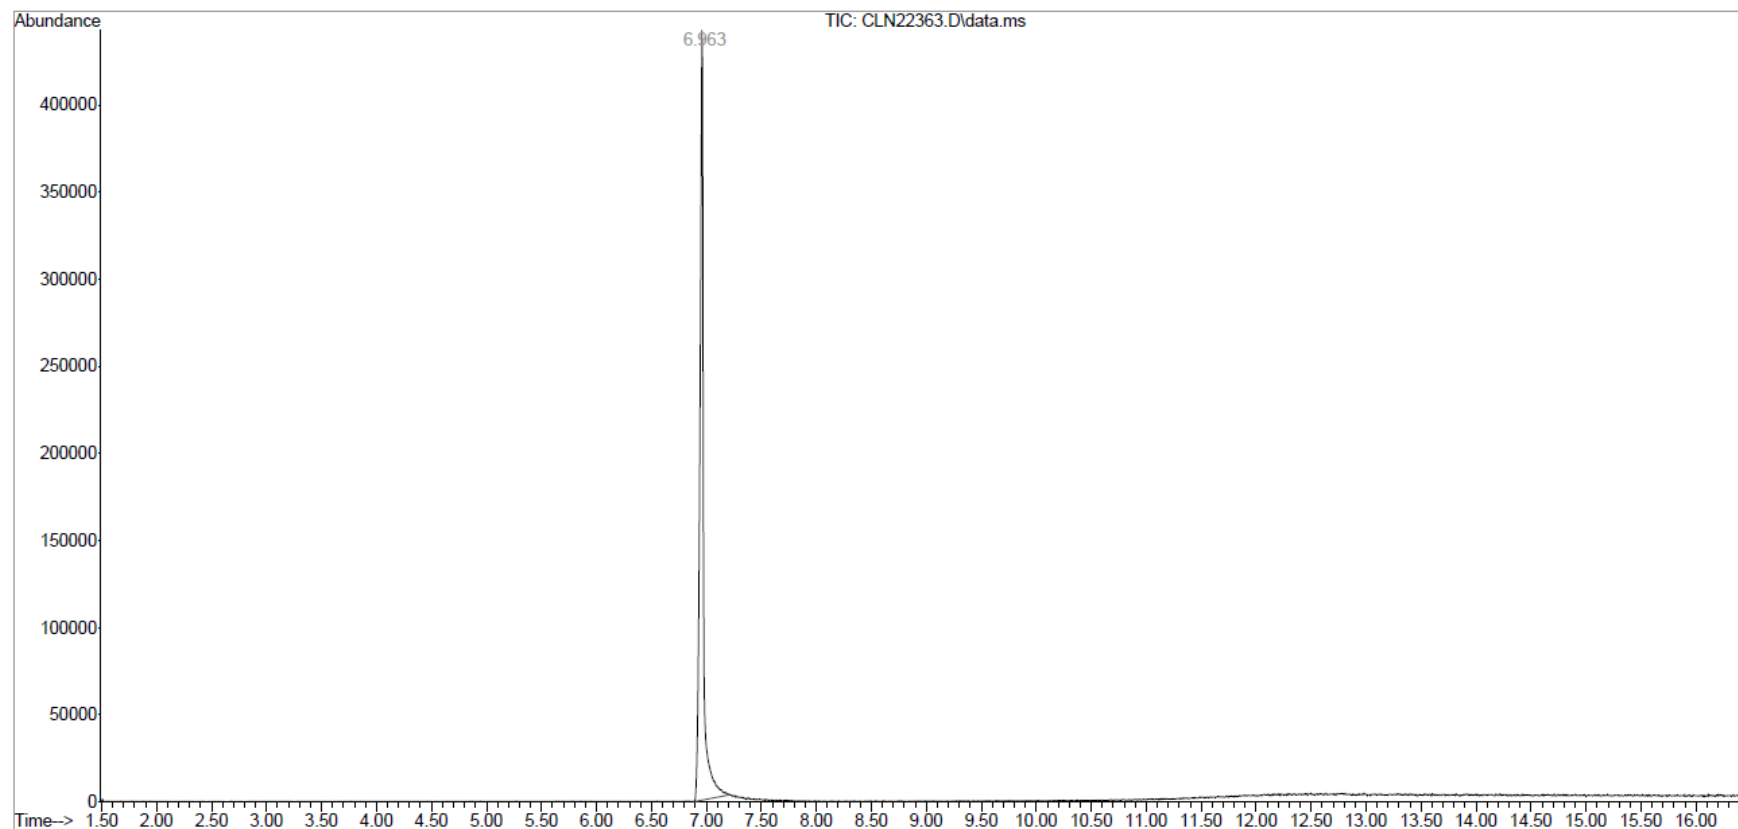

Figure S3. GC-MS trace of compound **20** (continued overleaf).

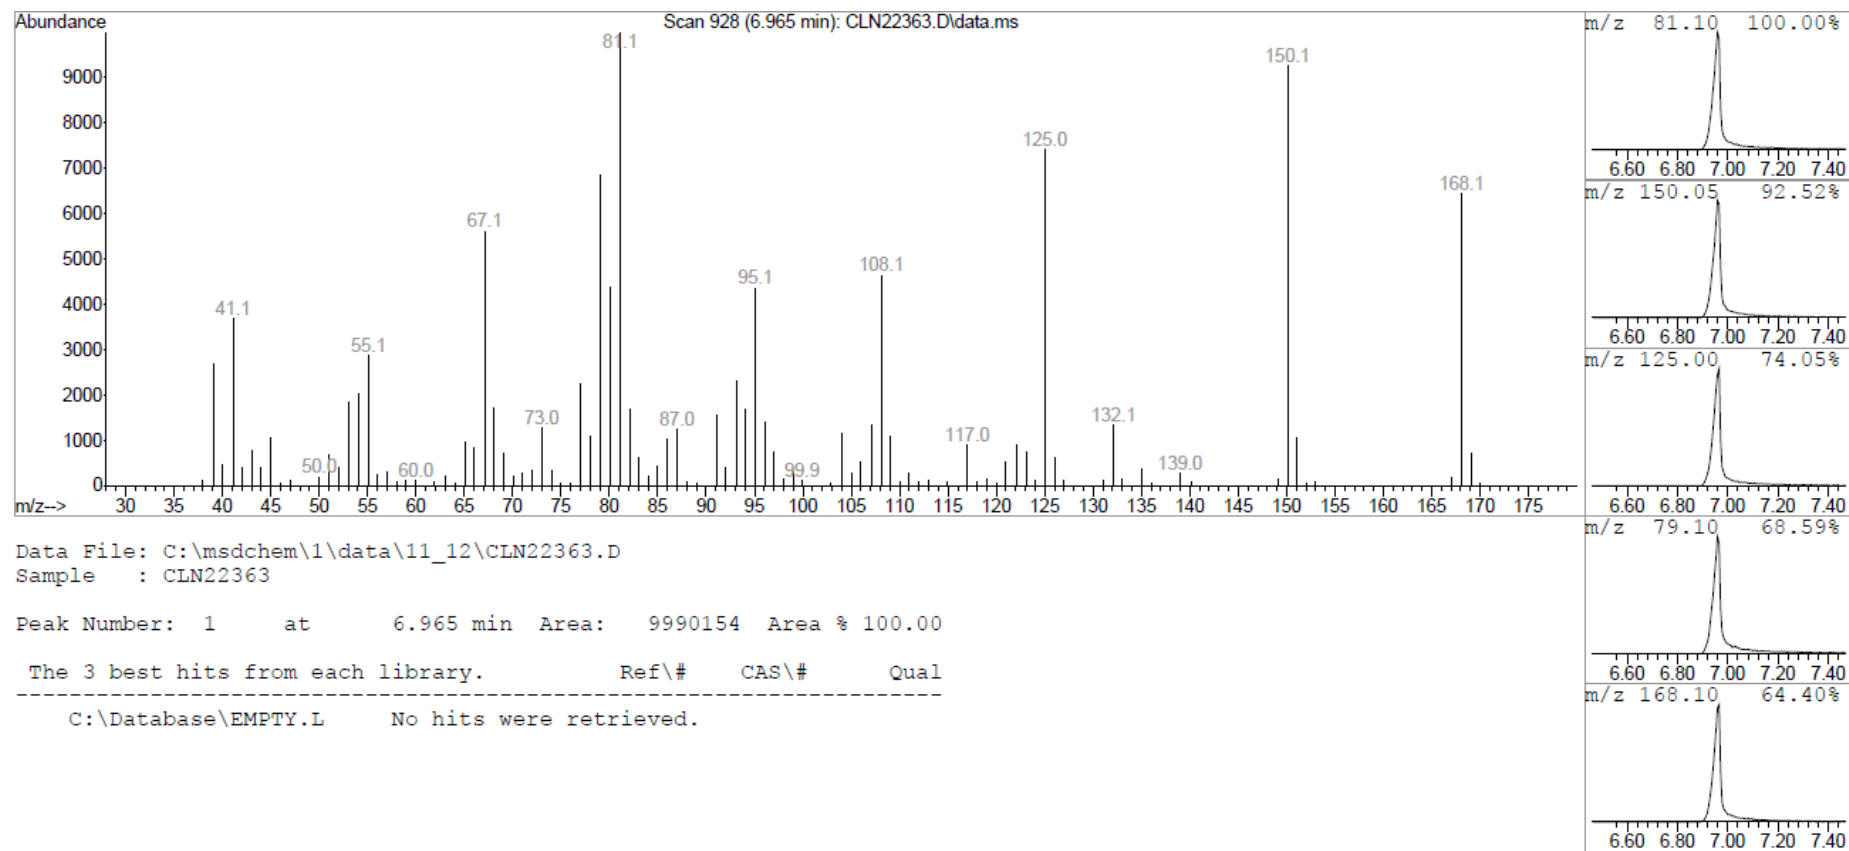

Figure S4. GC-MS trace of compound 20.

Error: Peaks not found!

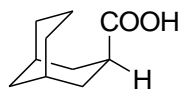

**Mol Wt**  
**Exact Mass**

0

Error: Peaks not found!

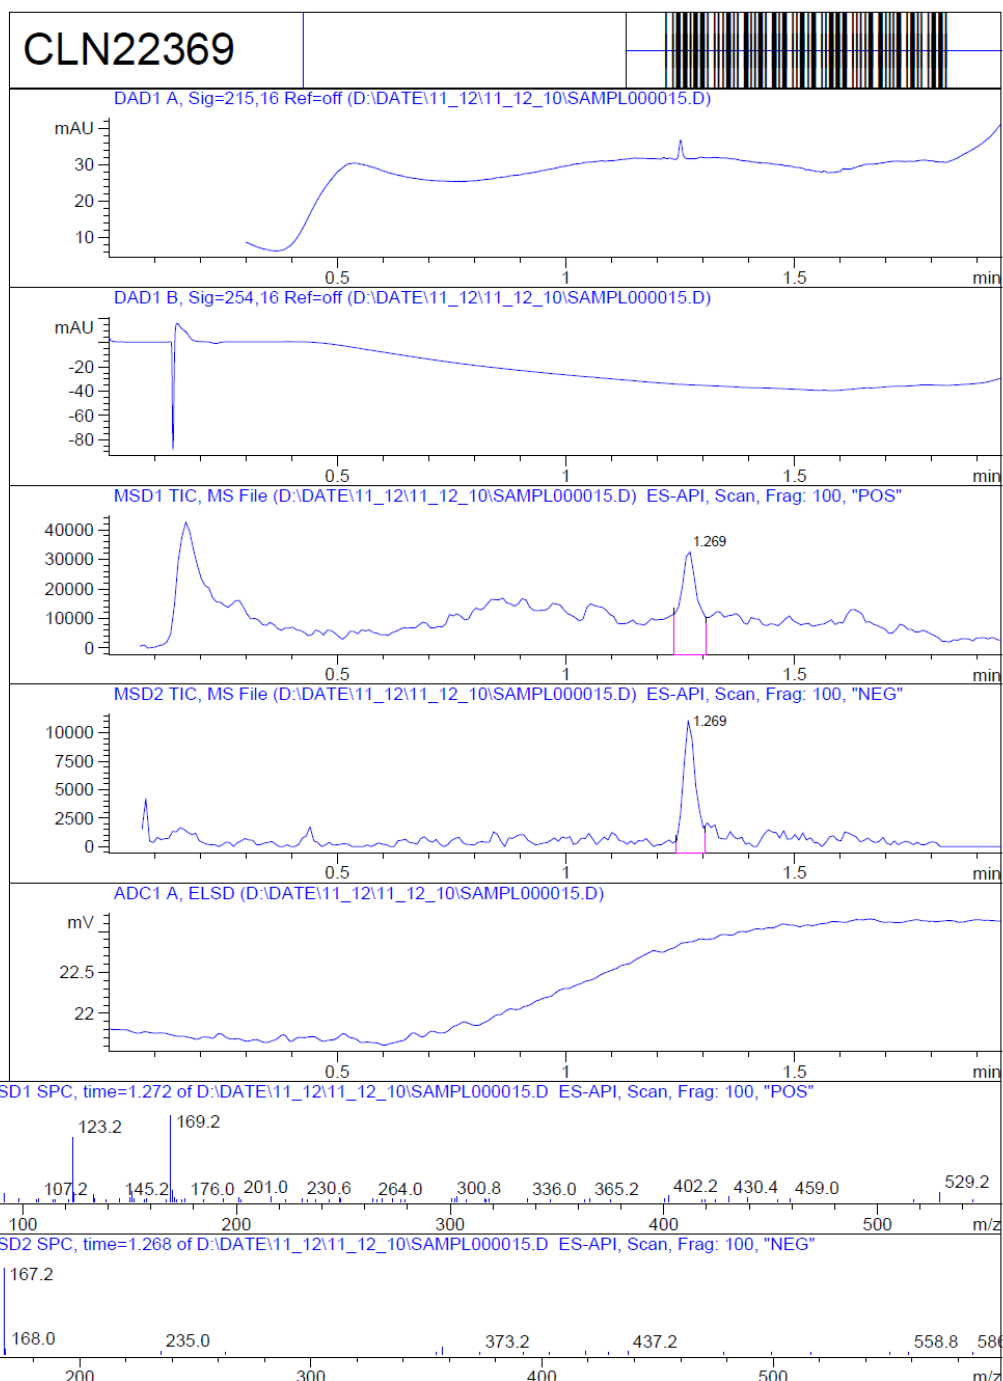

Inj.Date 11/12/2014

L

P2-A-08

-5-

Acq. Method C:\Chem32\>

>

**Figure S5.** LC-MS trace of compound 20.

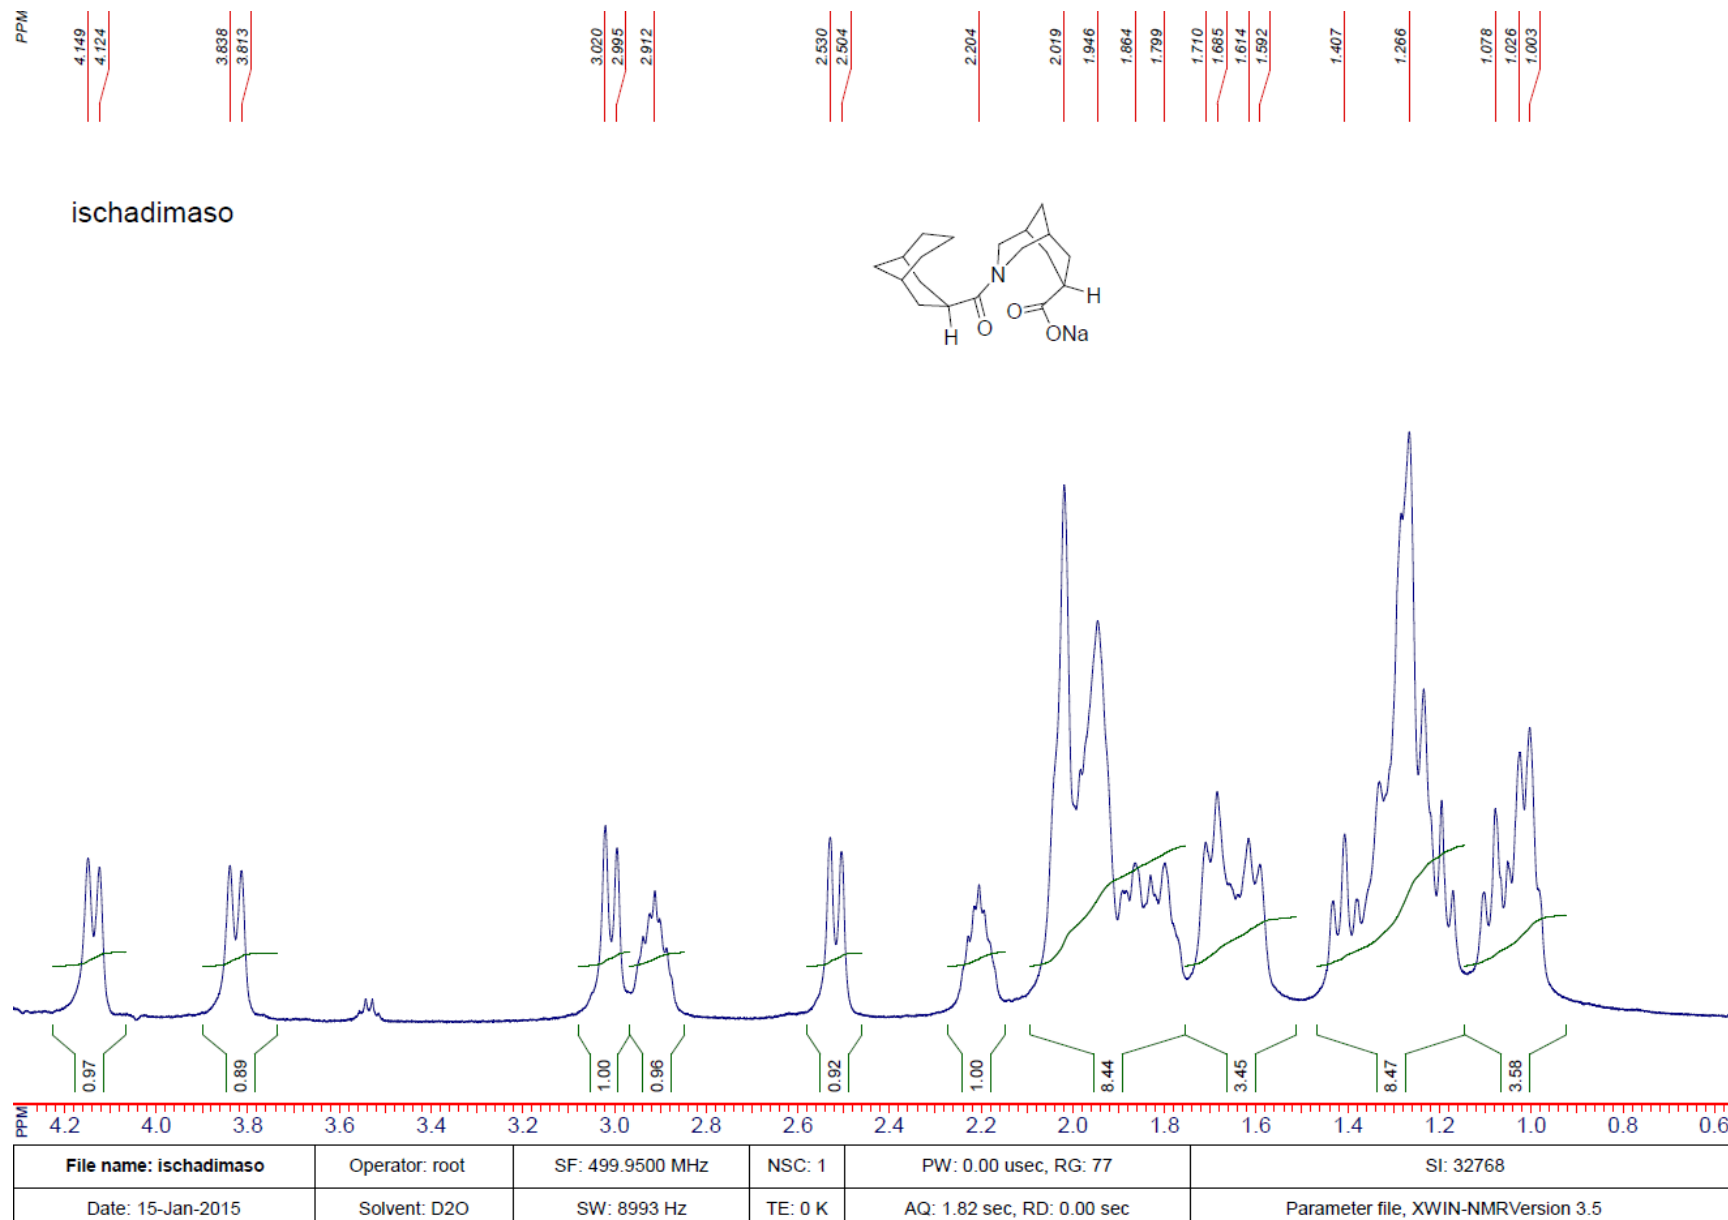

Figure S6. <sup>1</sup>H-NMR spectrum of sodium salt of compound 13.

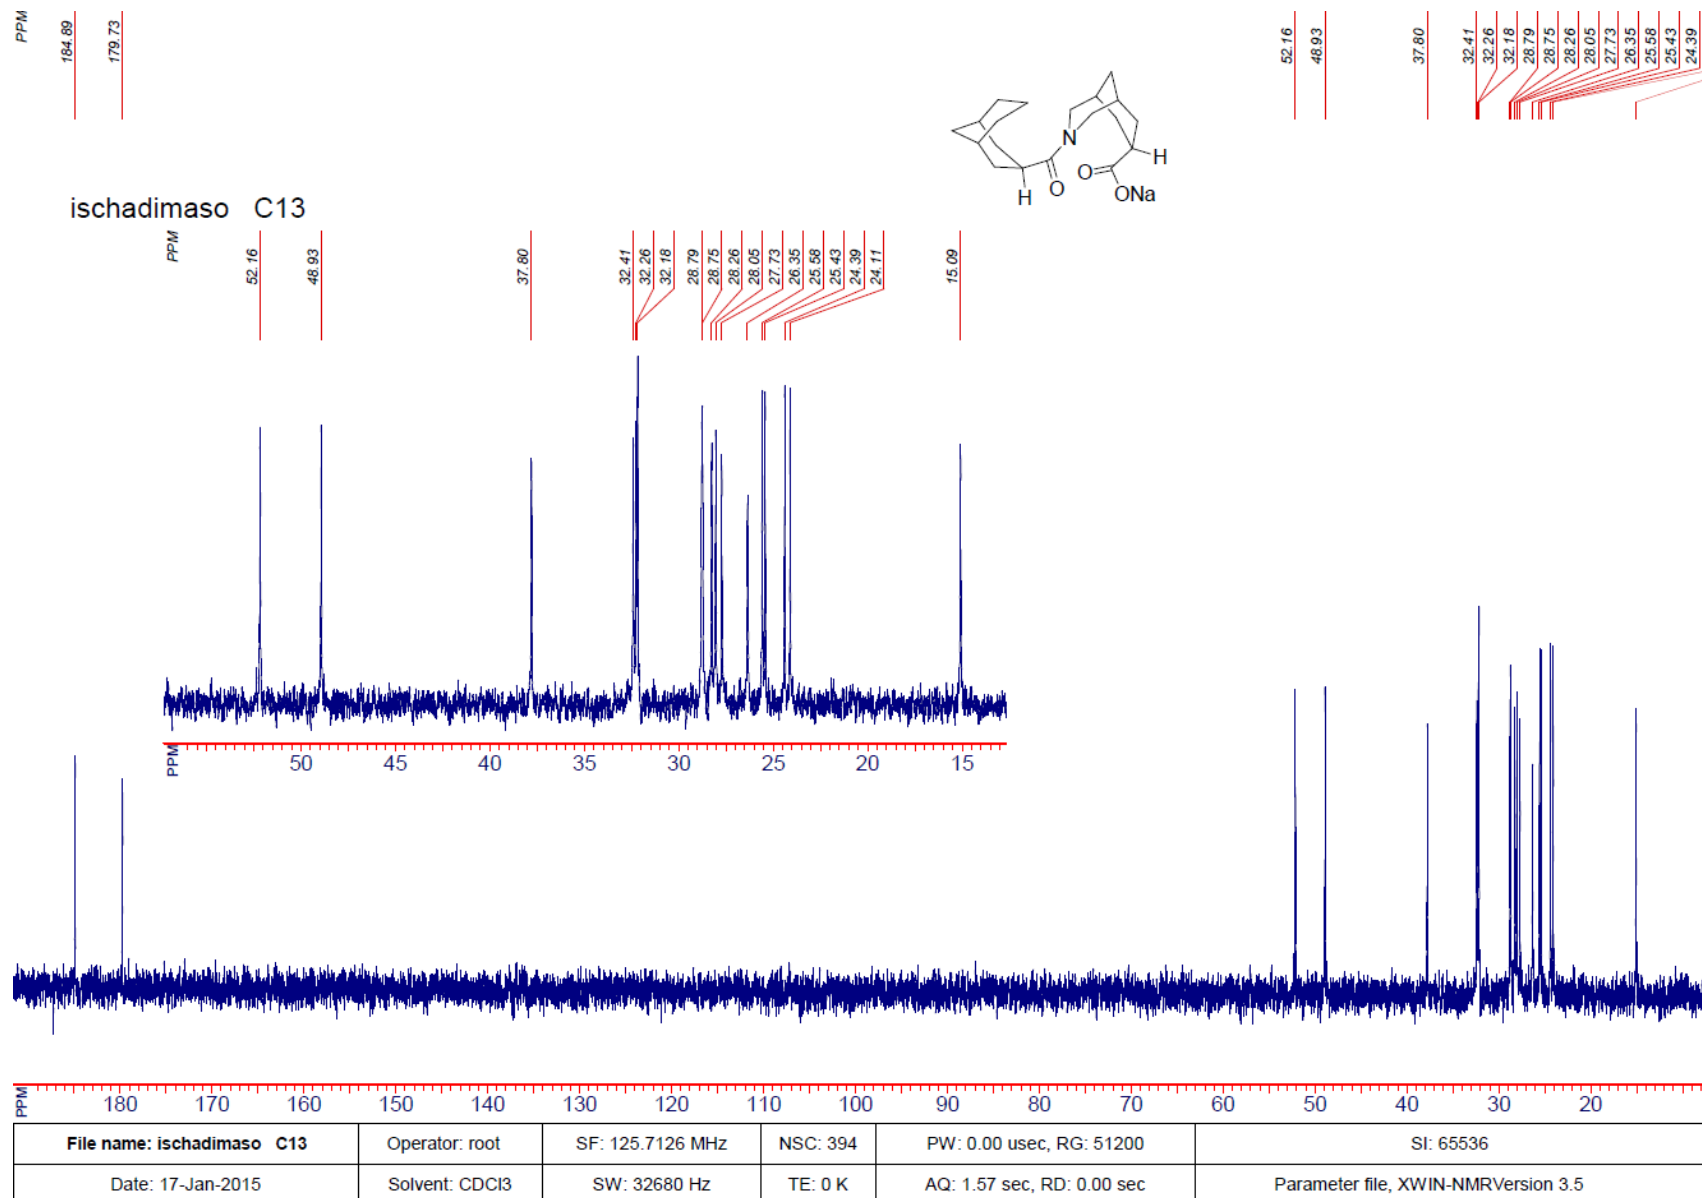

Figure S7. <sup>13</sup>C-NMR spectrum of sodium salt of compound 13.



MaxPeak: 91.08%  
Ret\_Time: 1.384 min

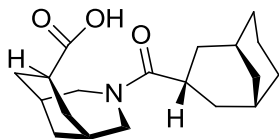

Mol Wt  
Exact Mass

| # | Time  | Area% |
|---|-------|-------|
| 1 | 1.180 | 8.92  |
| 2 | 1.384 | 91.08 |

CLP53778

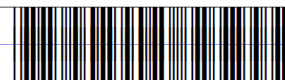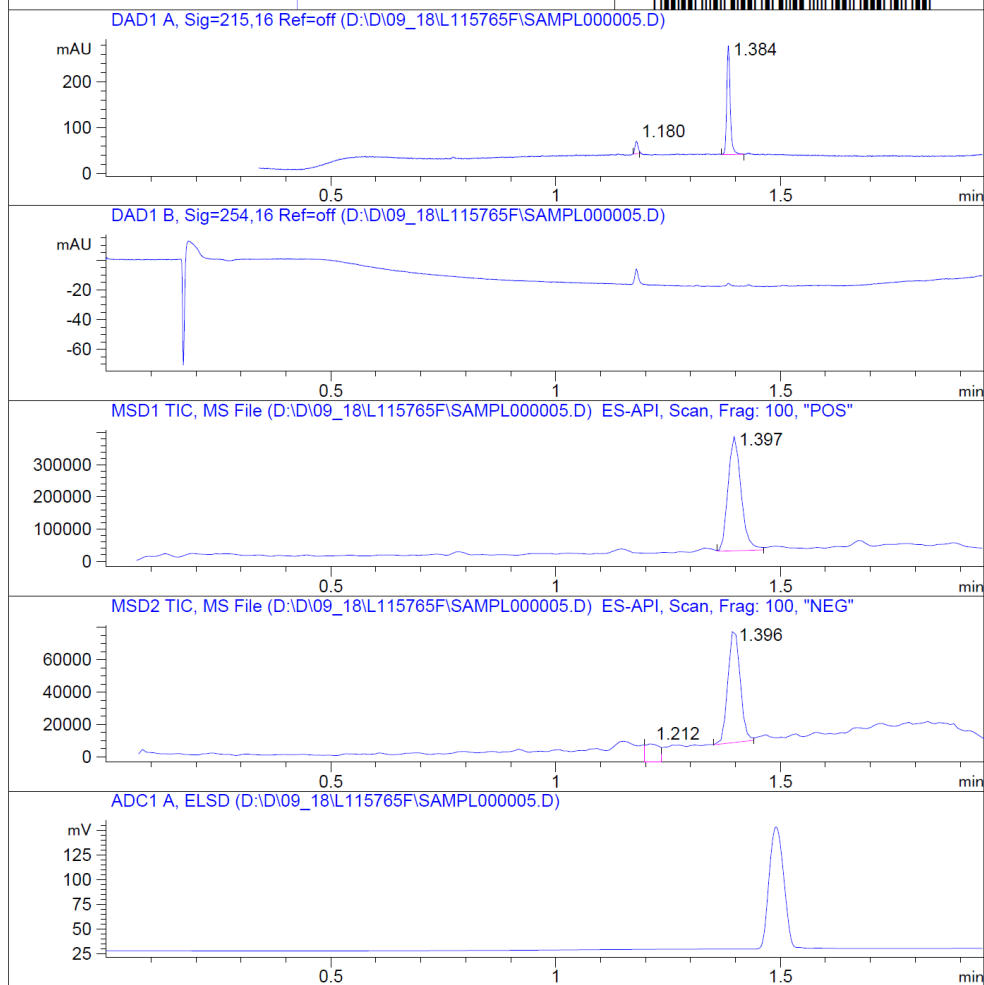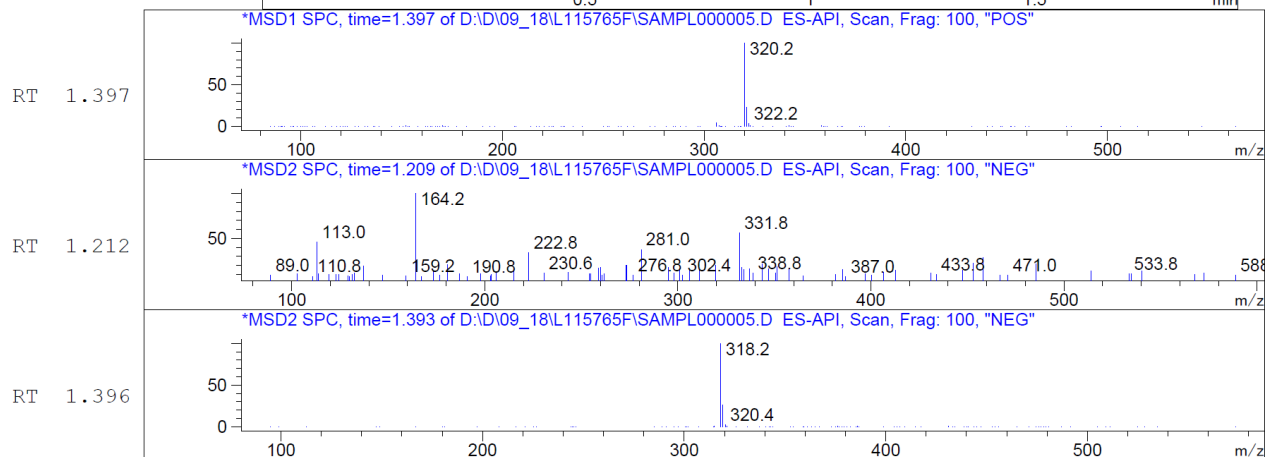

Inj.Date 9/18/2018

N

P2-A-04

-5-

Acq. Method C:\CHEM32\> ->

Figure S8. LC-MS trace of compound 13.

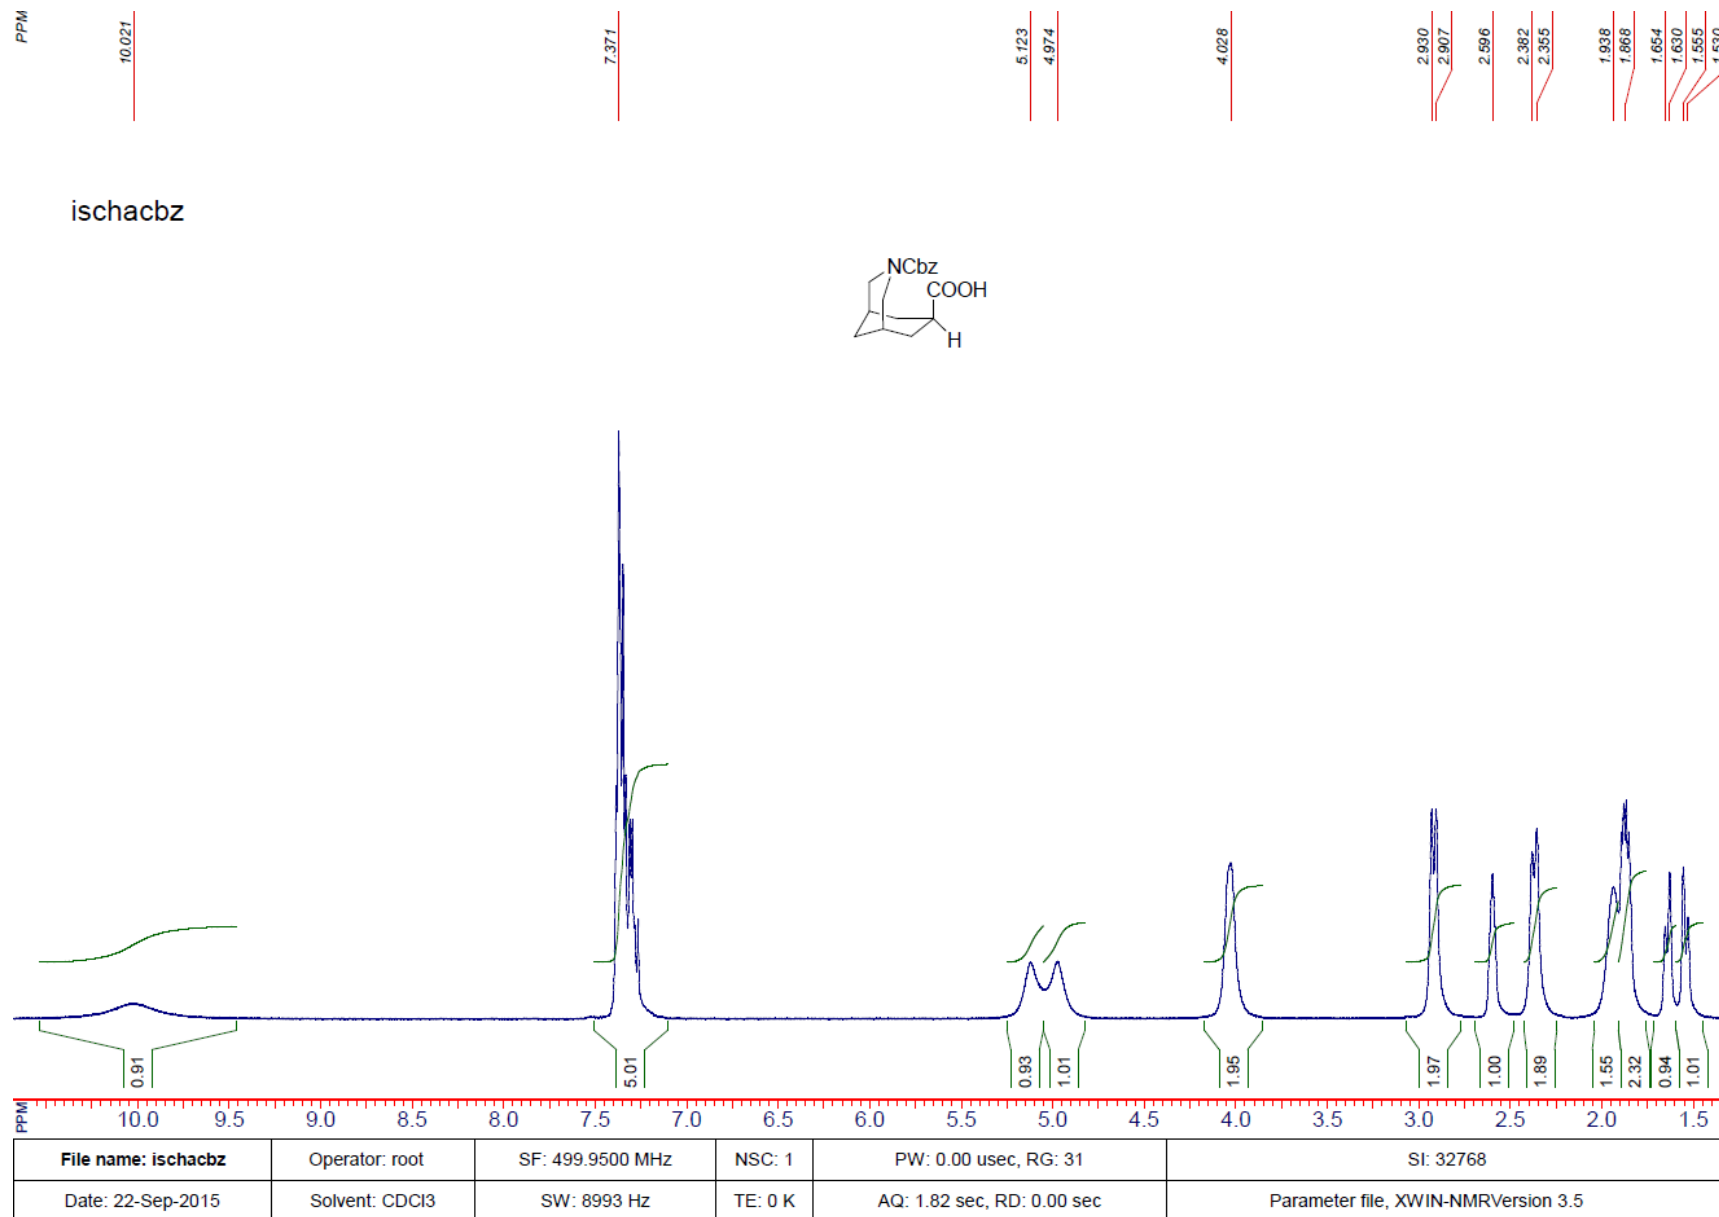

Figure S9.  $^1\text{H}$ -NMR spectrum of compound 21.

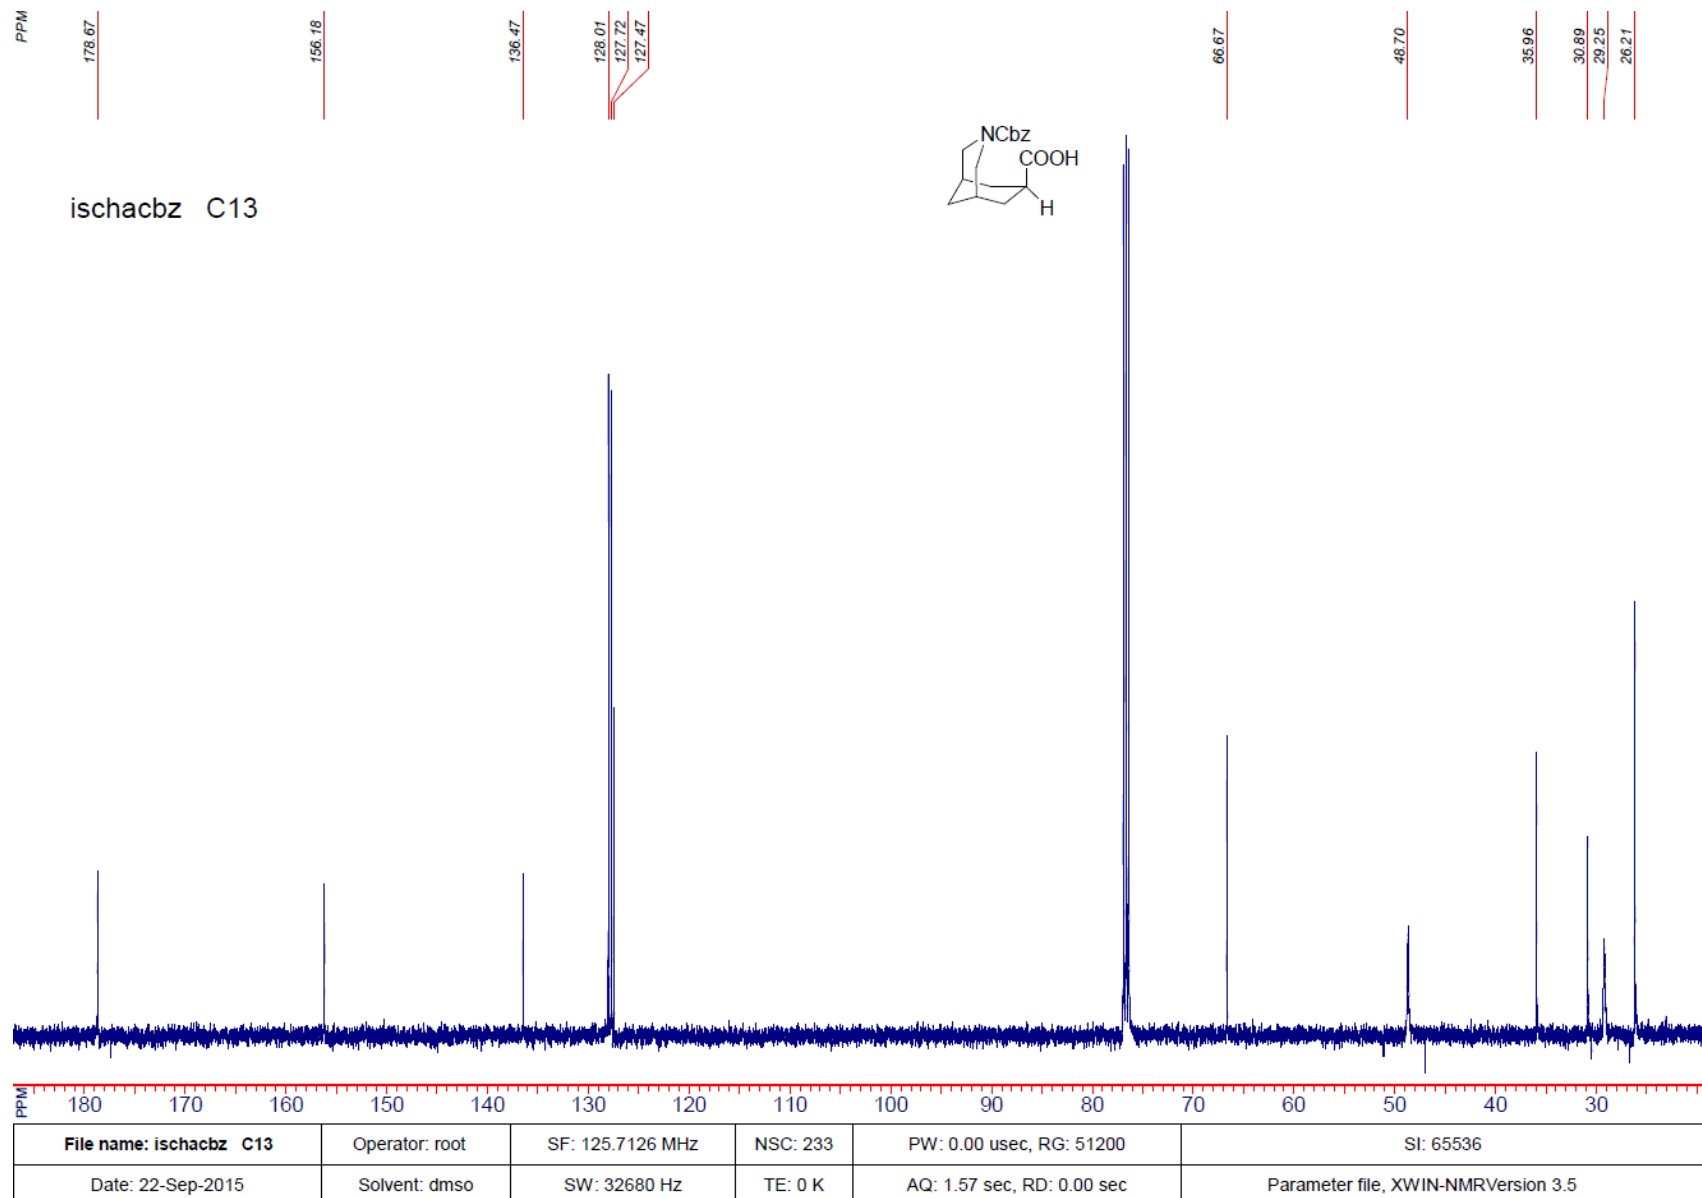

Figure S10.  $^{13}\text{C}$ -NMR spectrum of compound 21.

MaxPeak: 100.00%  
Ret\_Time: 1.223 min

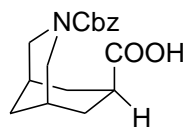

Mol Wt  
Exact Mass

| # | Time  | Area%  |
|---|-------|--------|
| 1 | 1.223 | 100.00 |

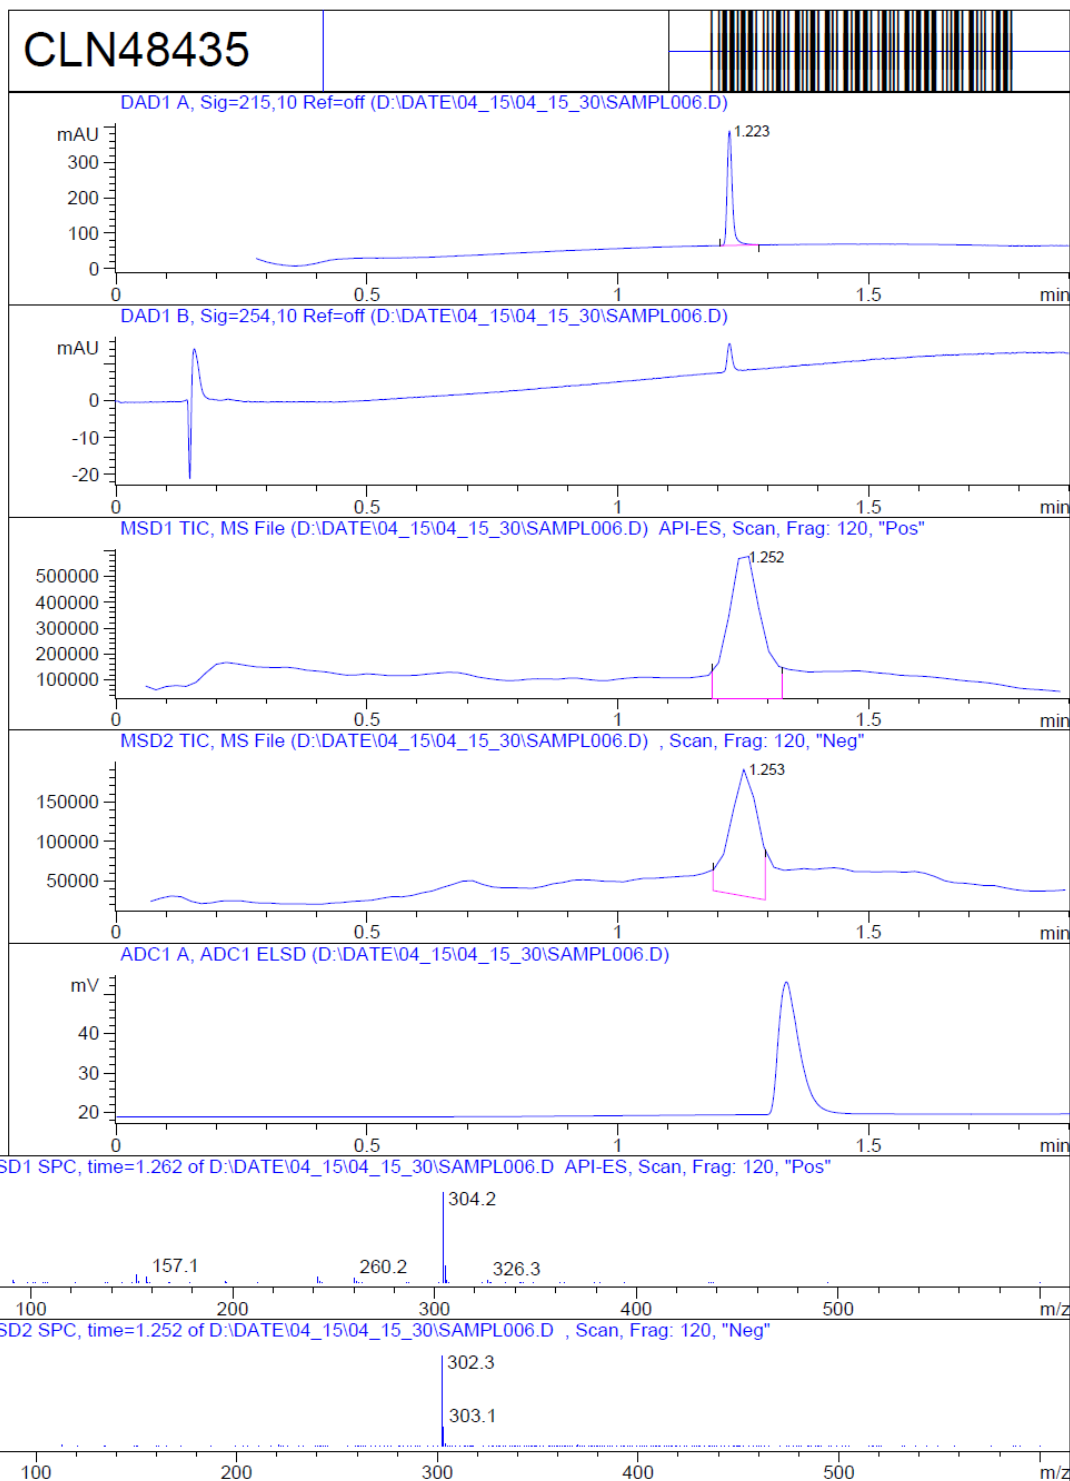

Figure S11. LC-MS trace of compound 21.

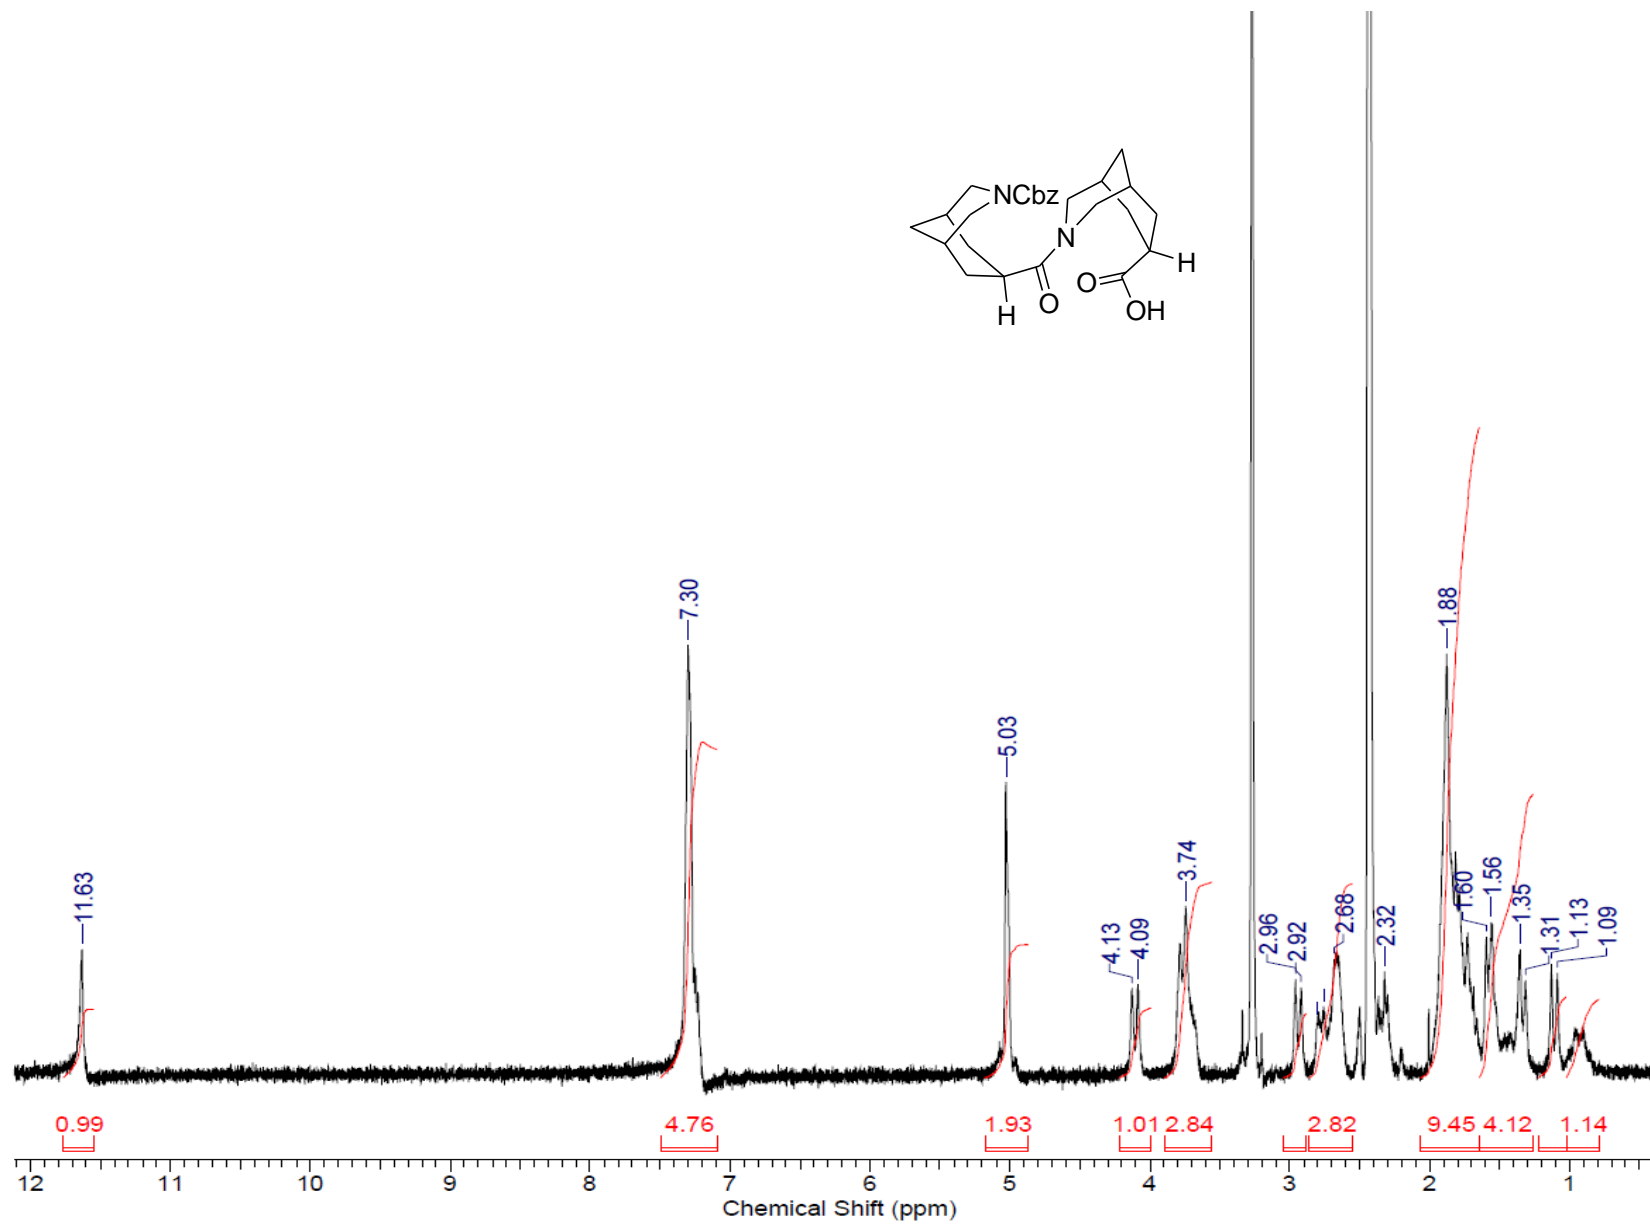

Figure S12. <sup>1</sup>H-NMR spectrum of compound 22.

MaxPeak: 96.23%  
Ret\_Time: 1.329 min

CLN48433

Mol Wt  
Exact Mass

| # | Time  | Area% |
|---|-------|-------|
| 1 | 1.235 | 3.77  |
| 2 | 1.329 | 96.23 |

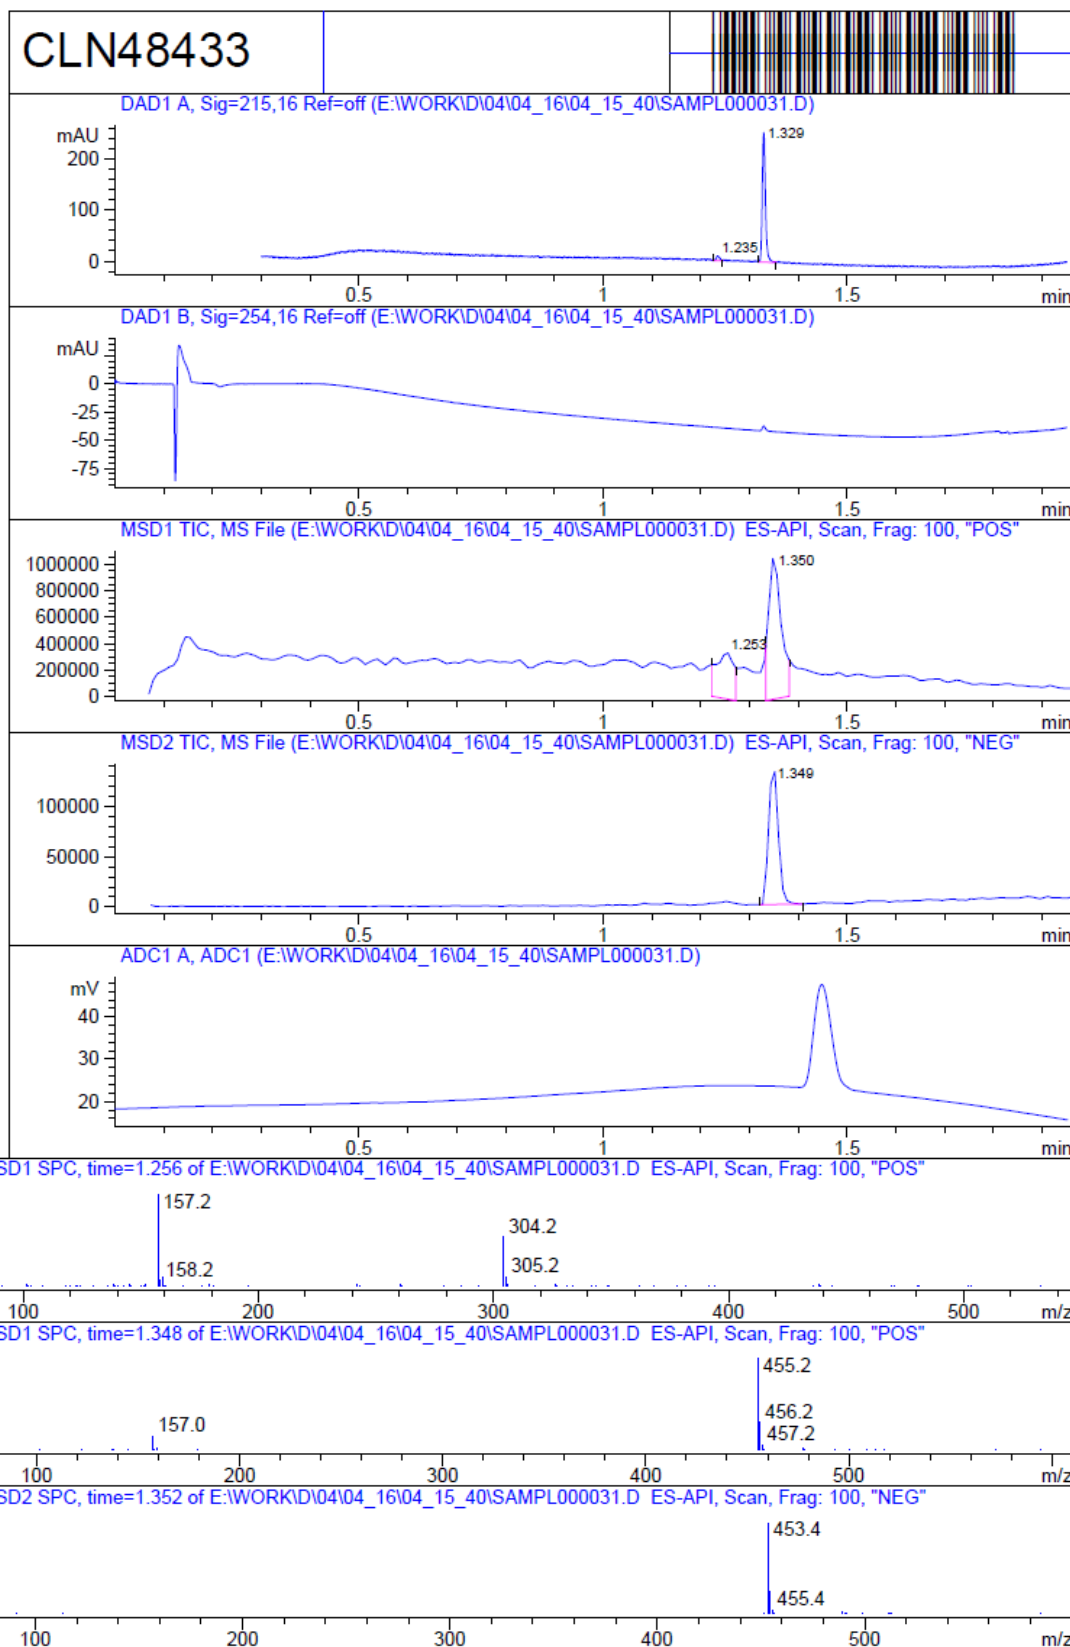

Figure S13. LC-MS trace of compound 22.

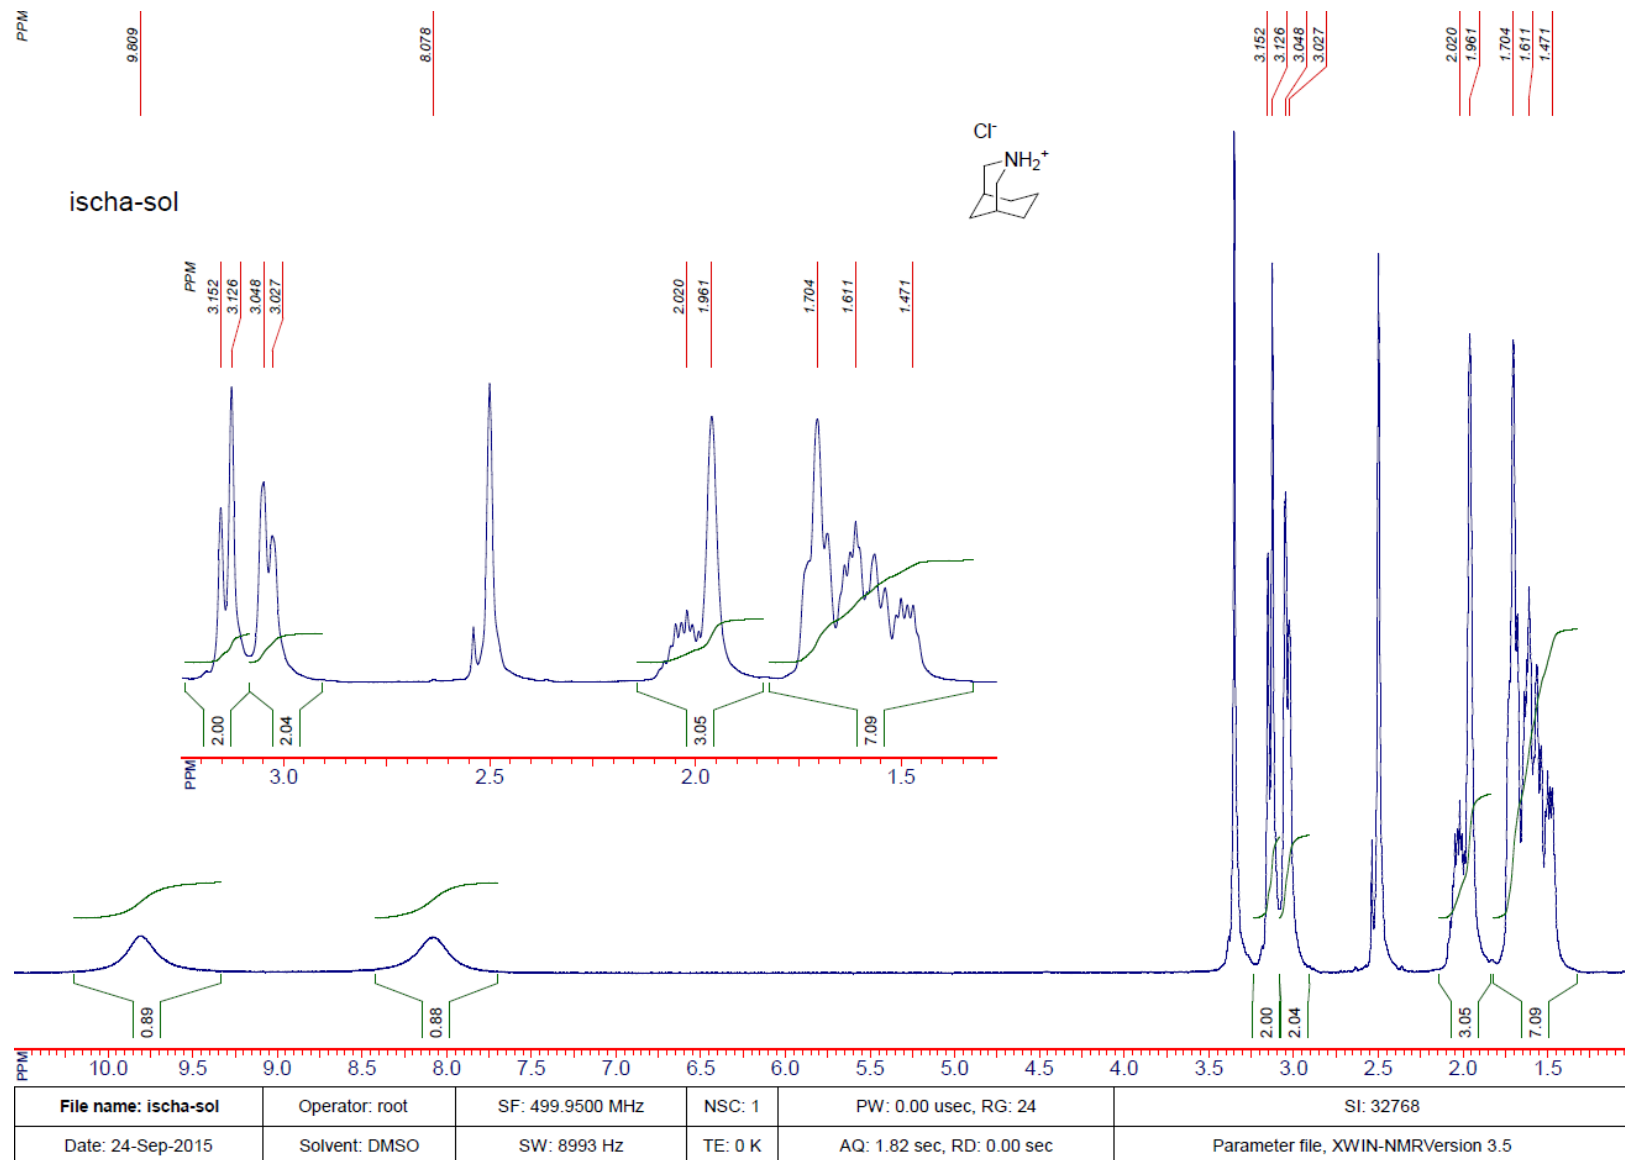

Figure S14.  $^1\text{H}$ -NMR spectrum of compound **25** (hydrochloride).

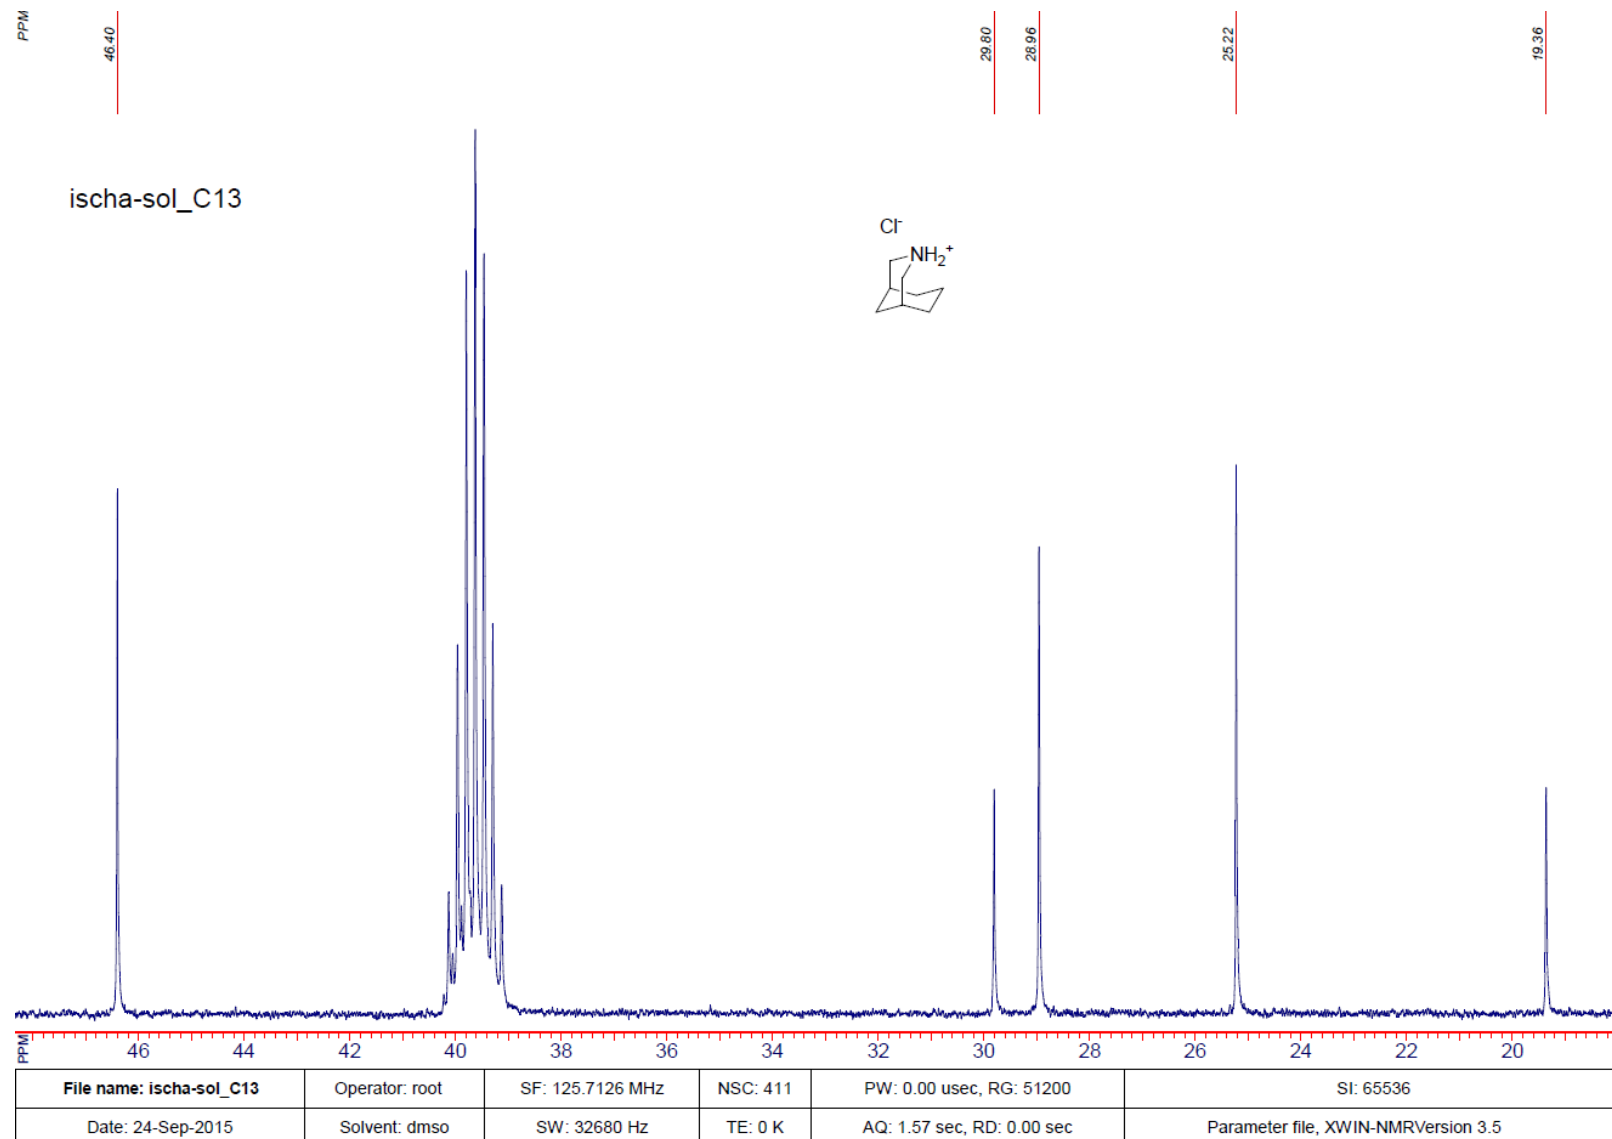

**Figure S15.**  $^{13}\text{C}$ -NMR spectrum of compound **25** (hydrochloride).





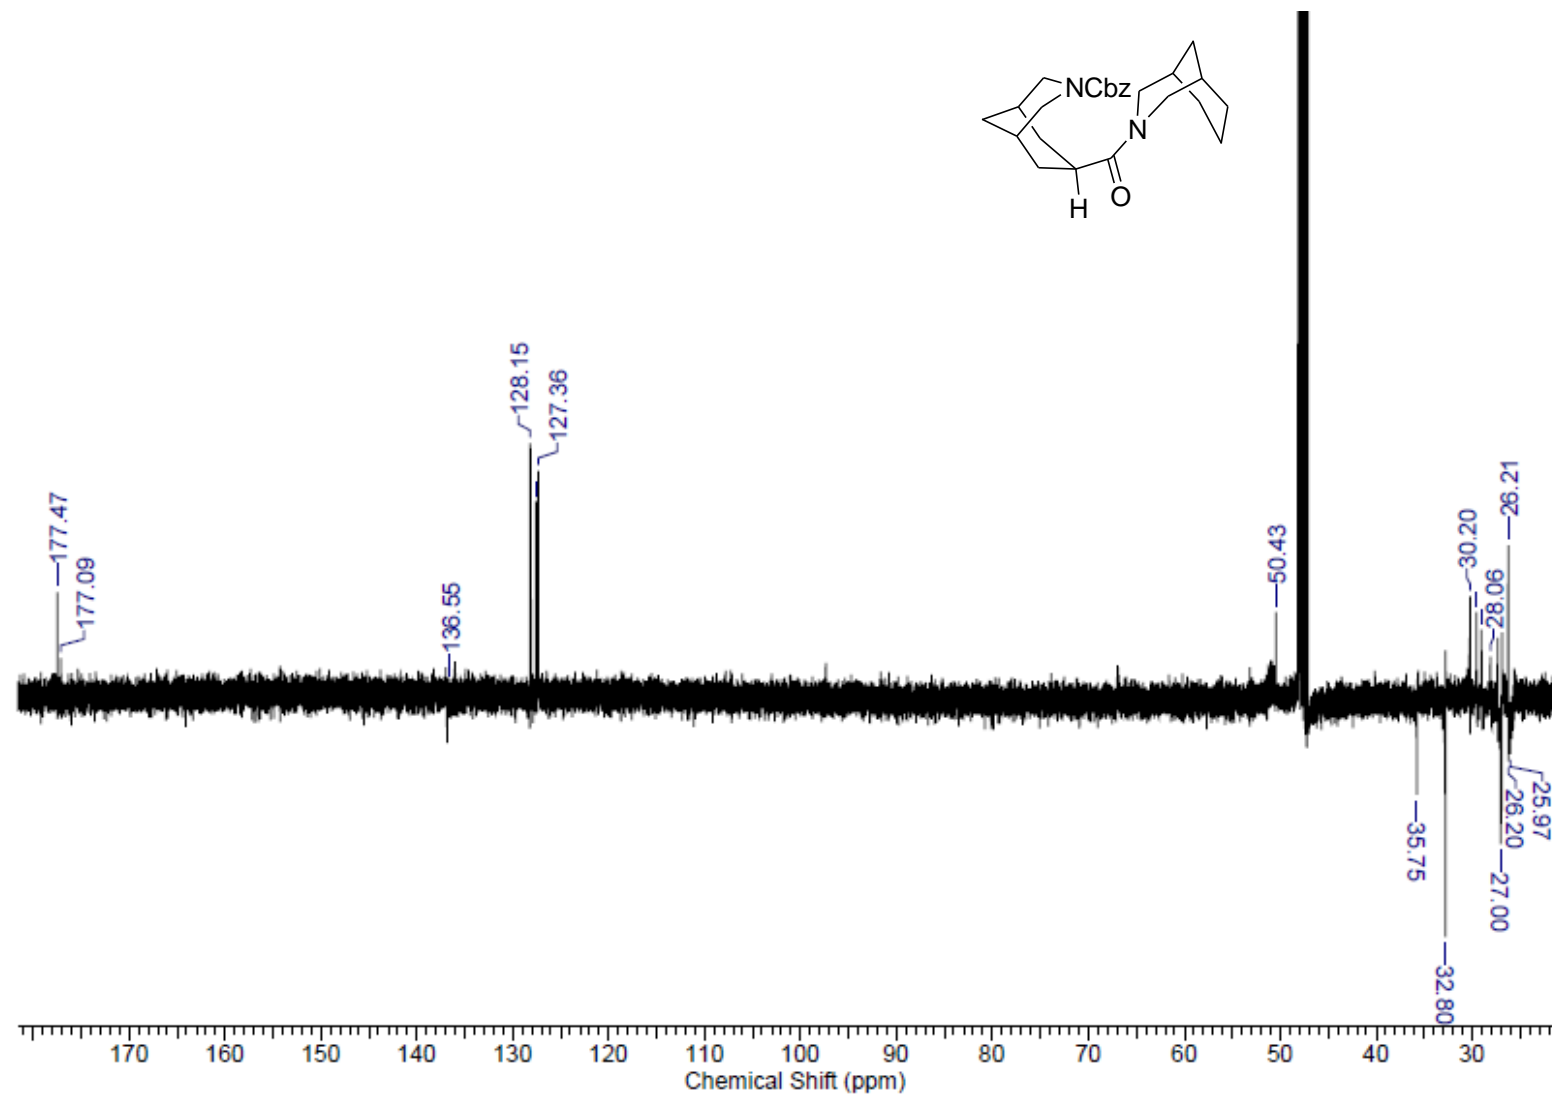

**Figure S17.**  $^{13}\text{C}$ -NMR spectrum (INEPT) of compound 26.

MaxPeak: 100.00%  
Ret\_Time: 1.672 min

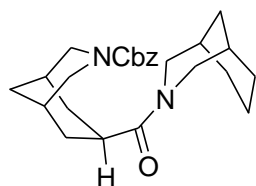

Mol Wt

Exact Mass

| # | Time  | Area%  |
|---|-------|--------|
| 1 | 1.672 | 100.00 |

CLN63439

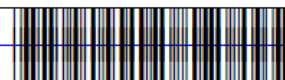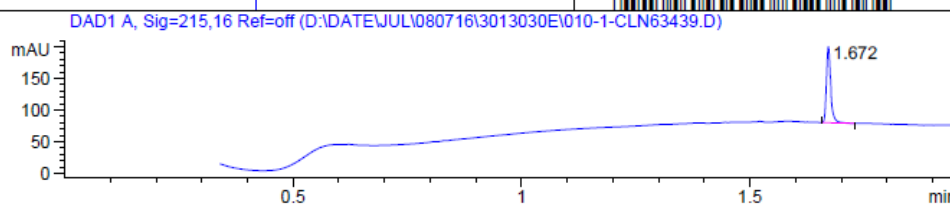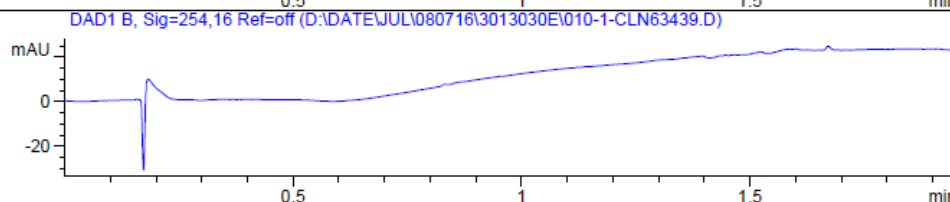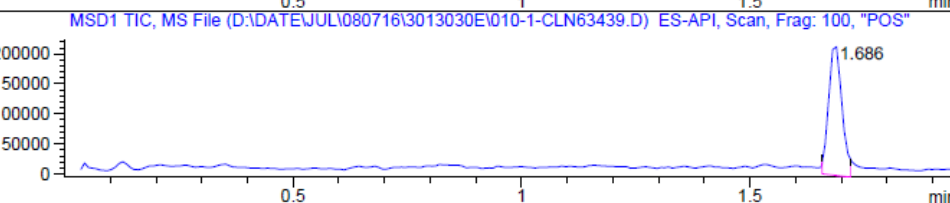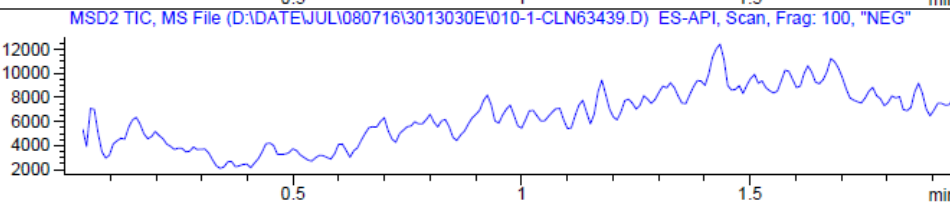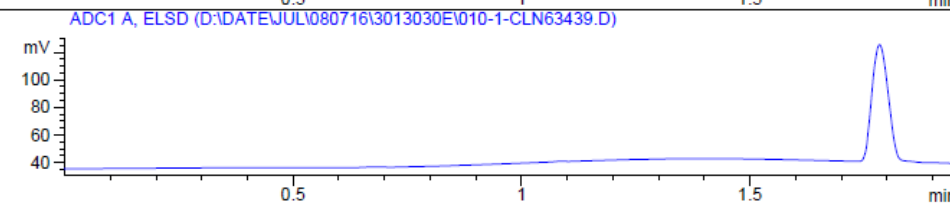

RT 1.686

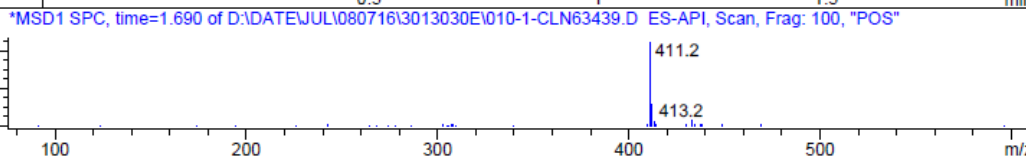

Figure S18. LC-MS trace of compound 26.

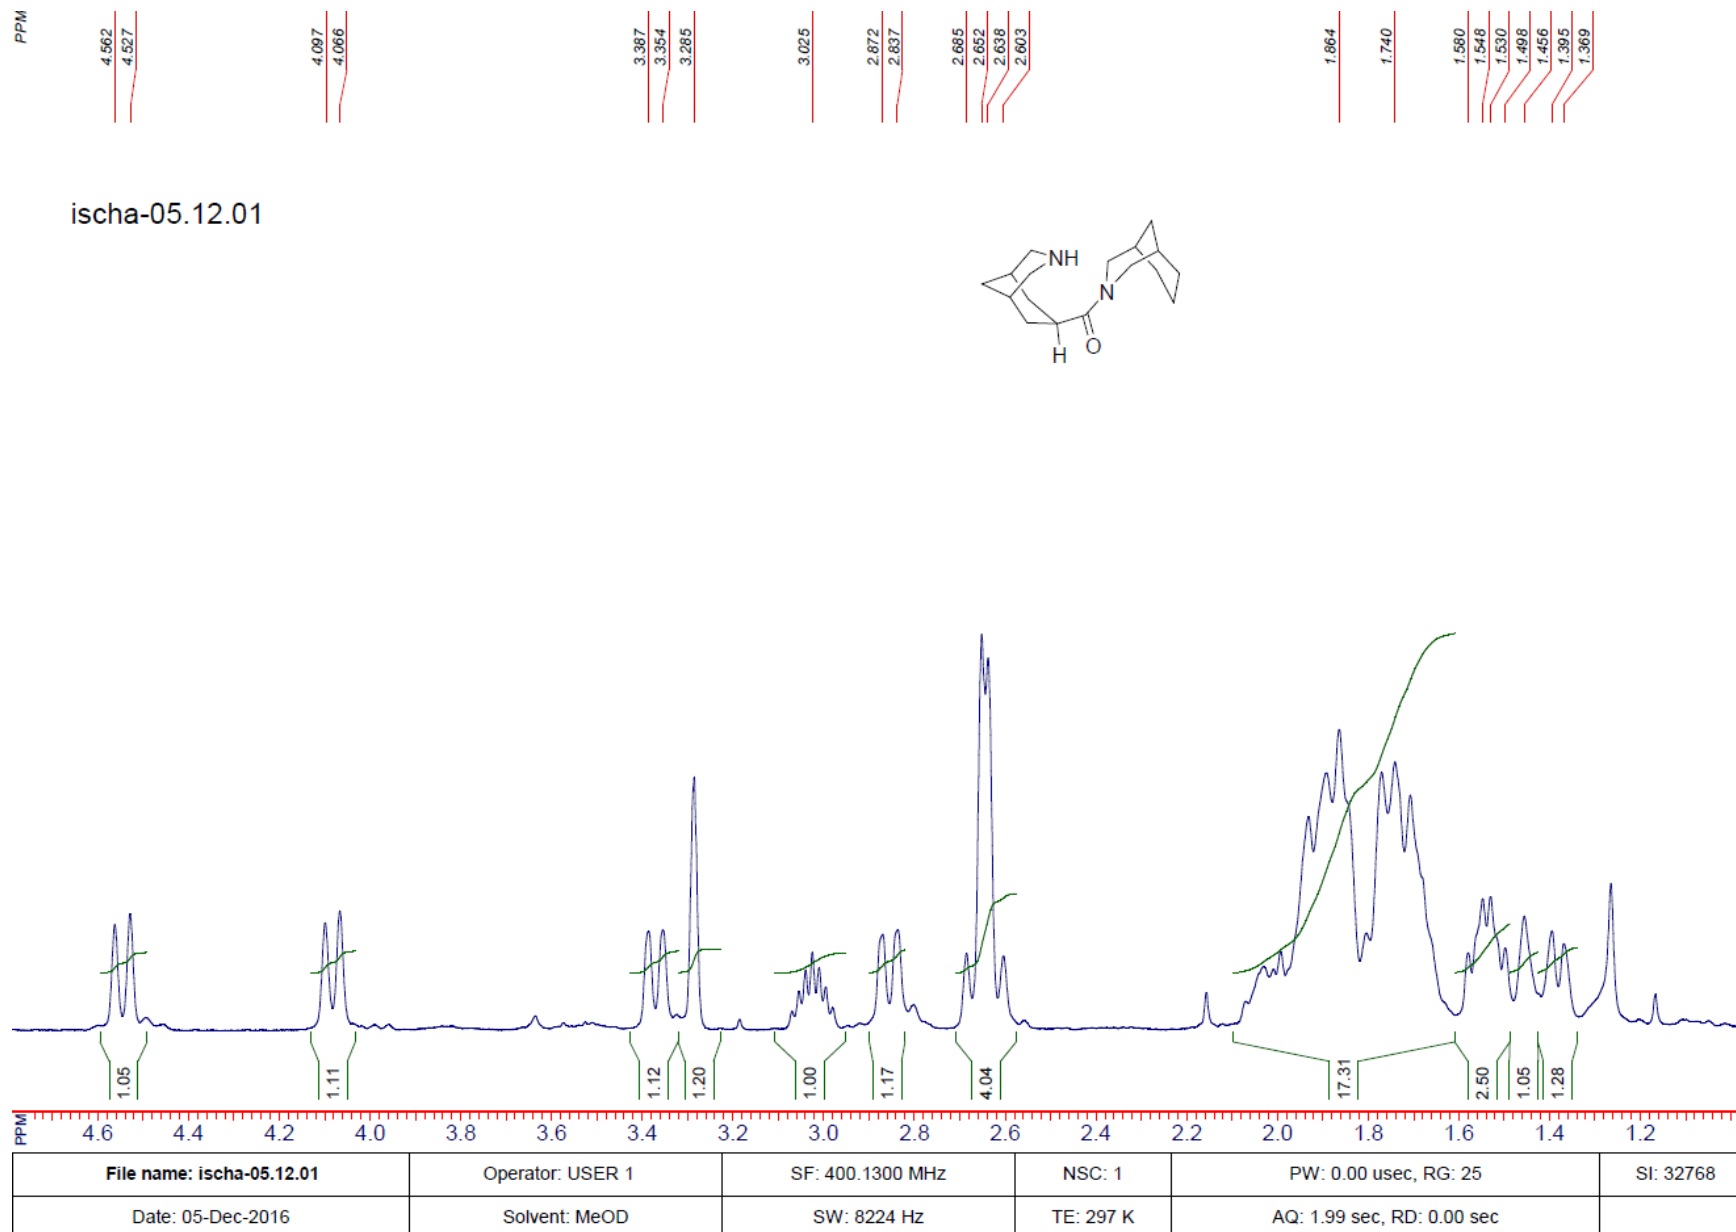

Figure S19. <sup>1</sup>H-NMR spectrum of compound 14.

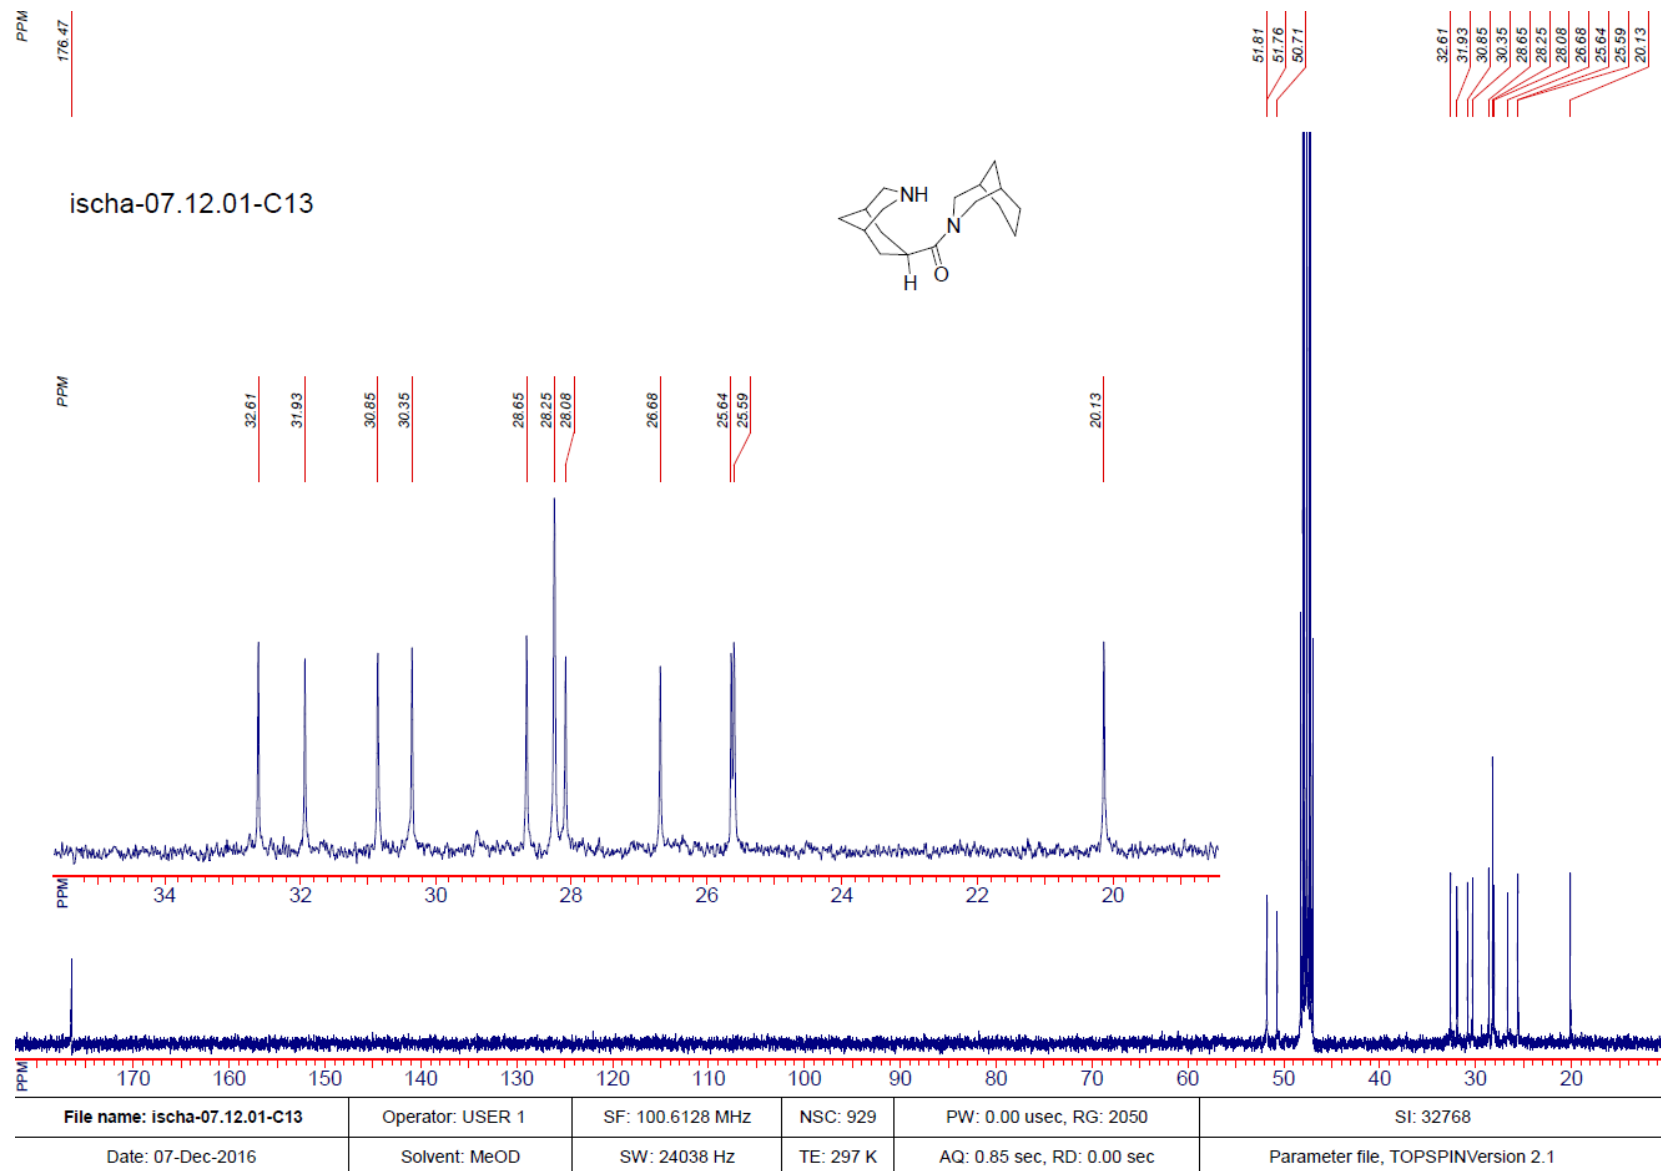

Figure S20.  $^{13}\text{C}$ -NMR spectrum of compound 14.

MaxPeak: 100.00%  
Ret\_Time: 0.961 min

CLO05269

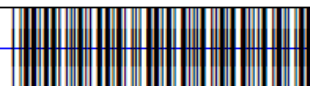

Mol Wt  
Exact Mass

| # | Time  | Area%  |
|---|-------|--------|
| 1 | 0.961 | 100.00 |

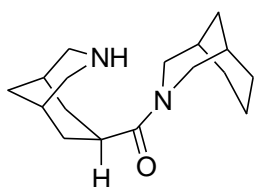

0

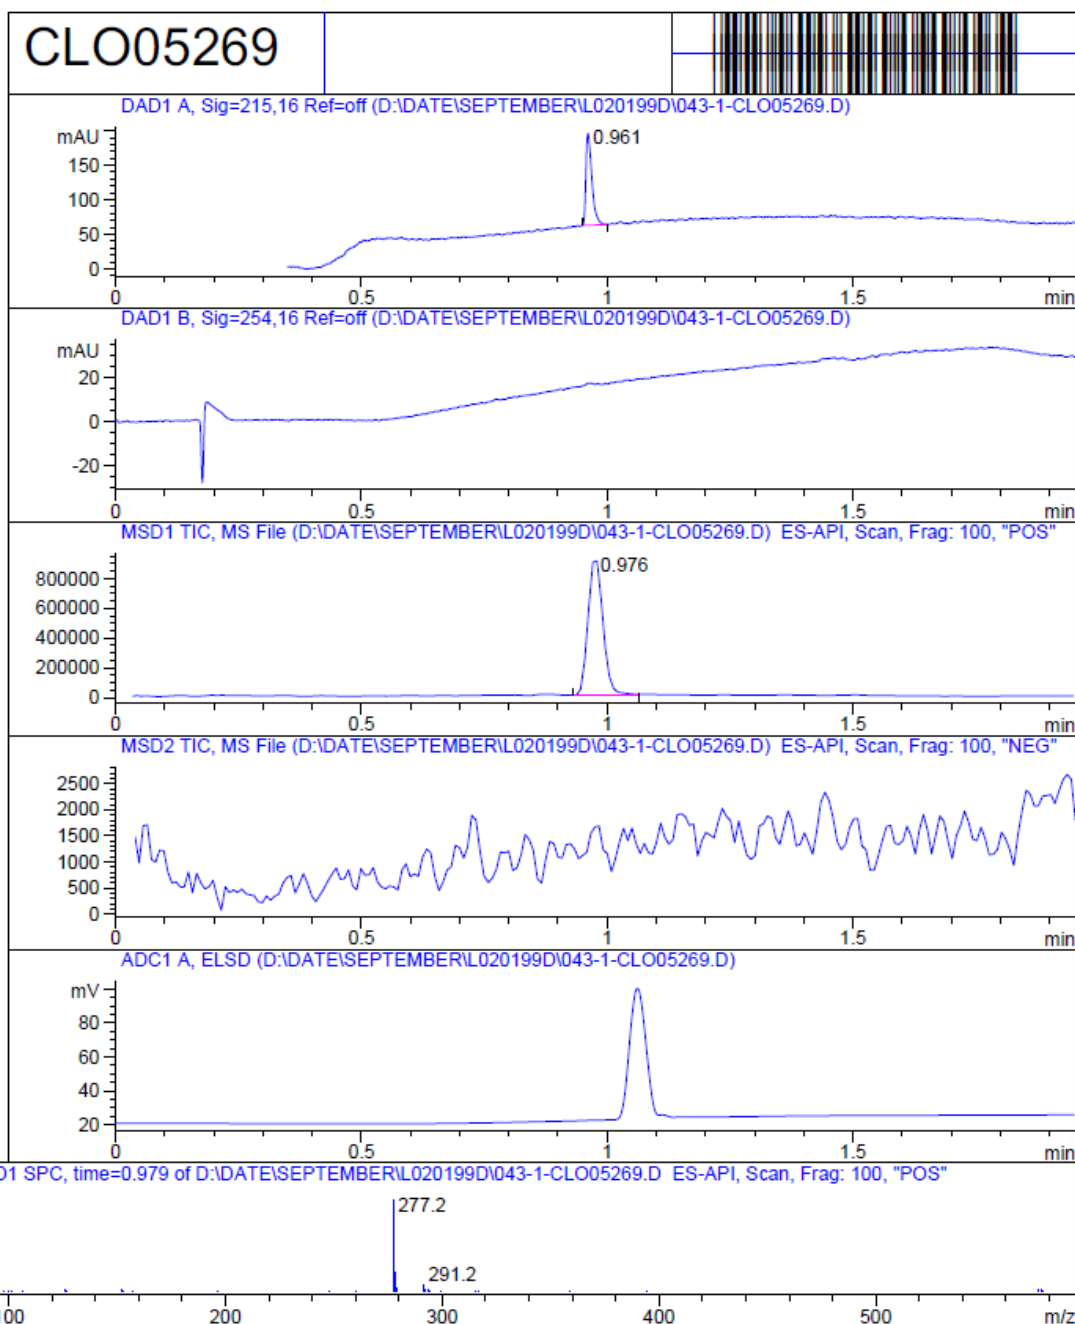

Figure S21. LC-MS trace of compound 14.

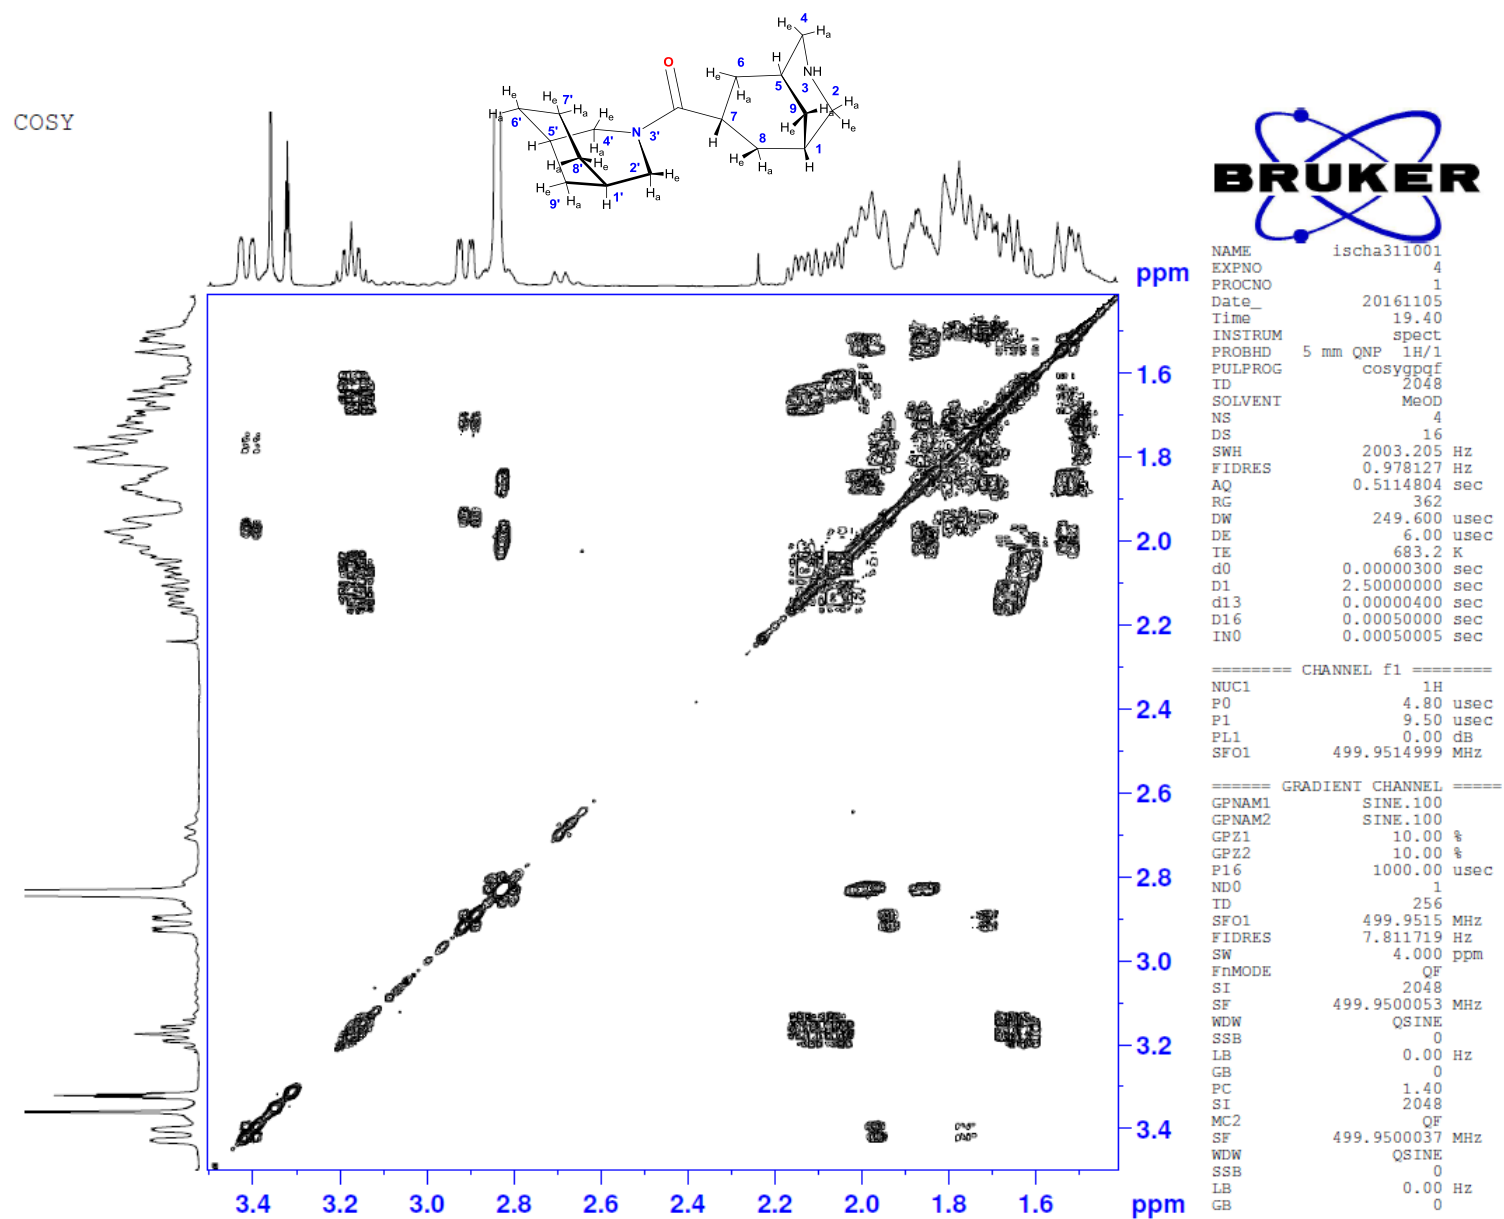

Figure S22. H,H-COSY spectrum of compound 14.

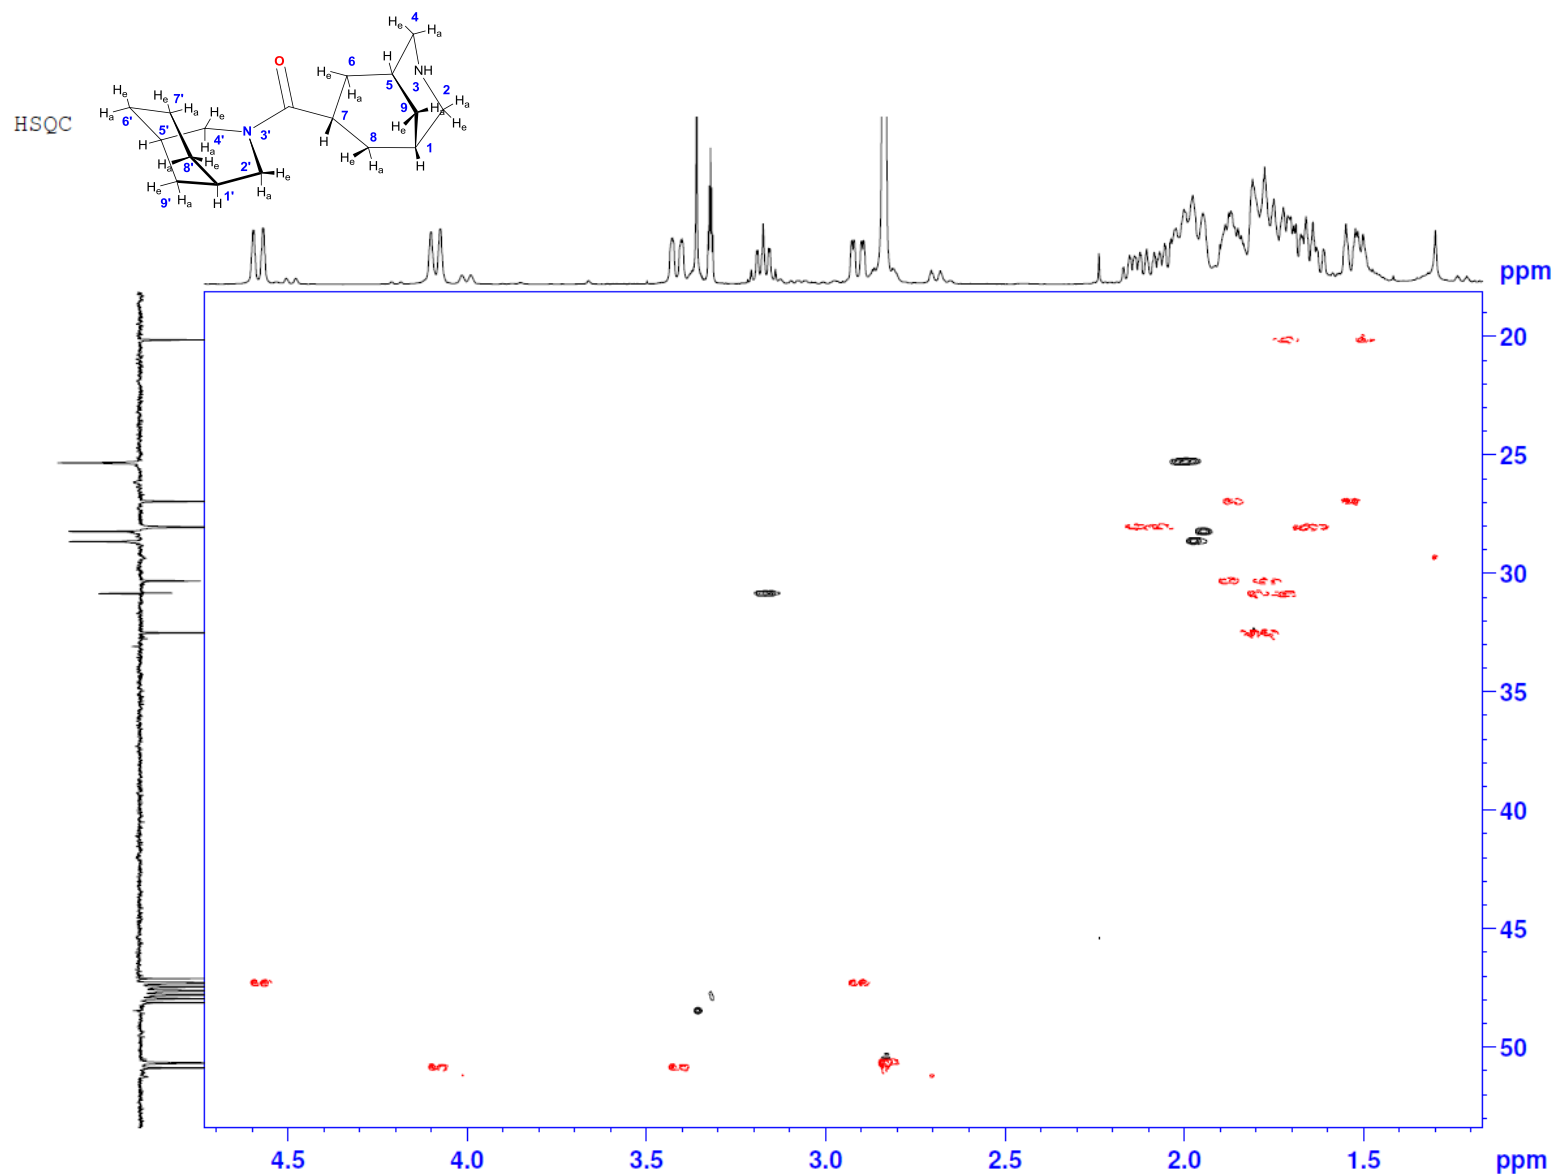

Figure S23. C,H-HSQC spectrum of compound 14.



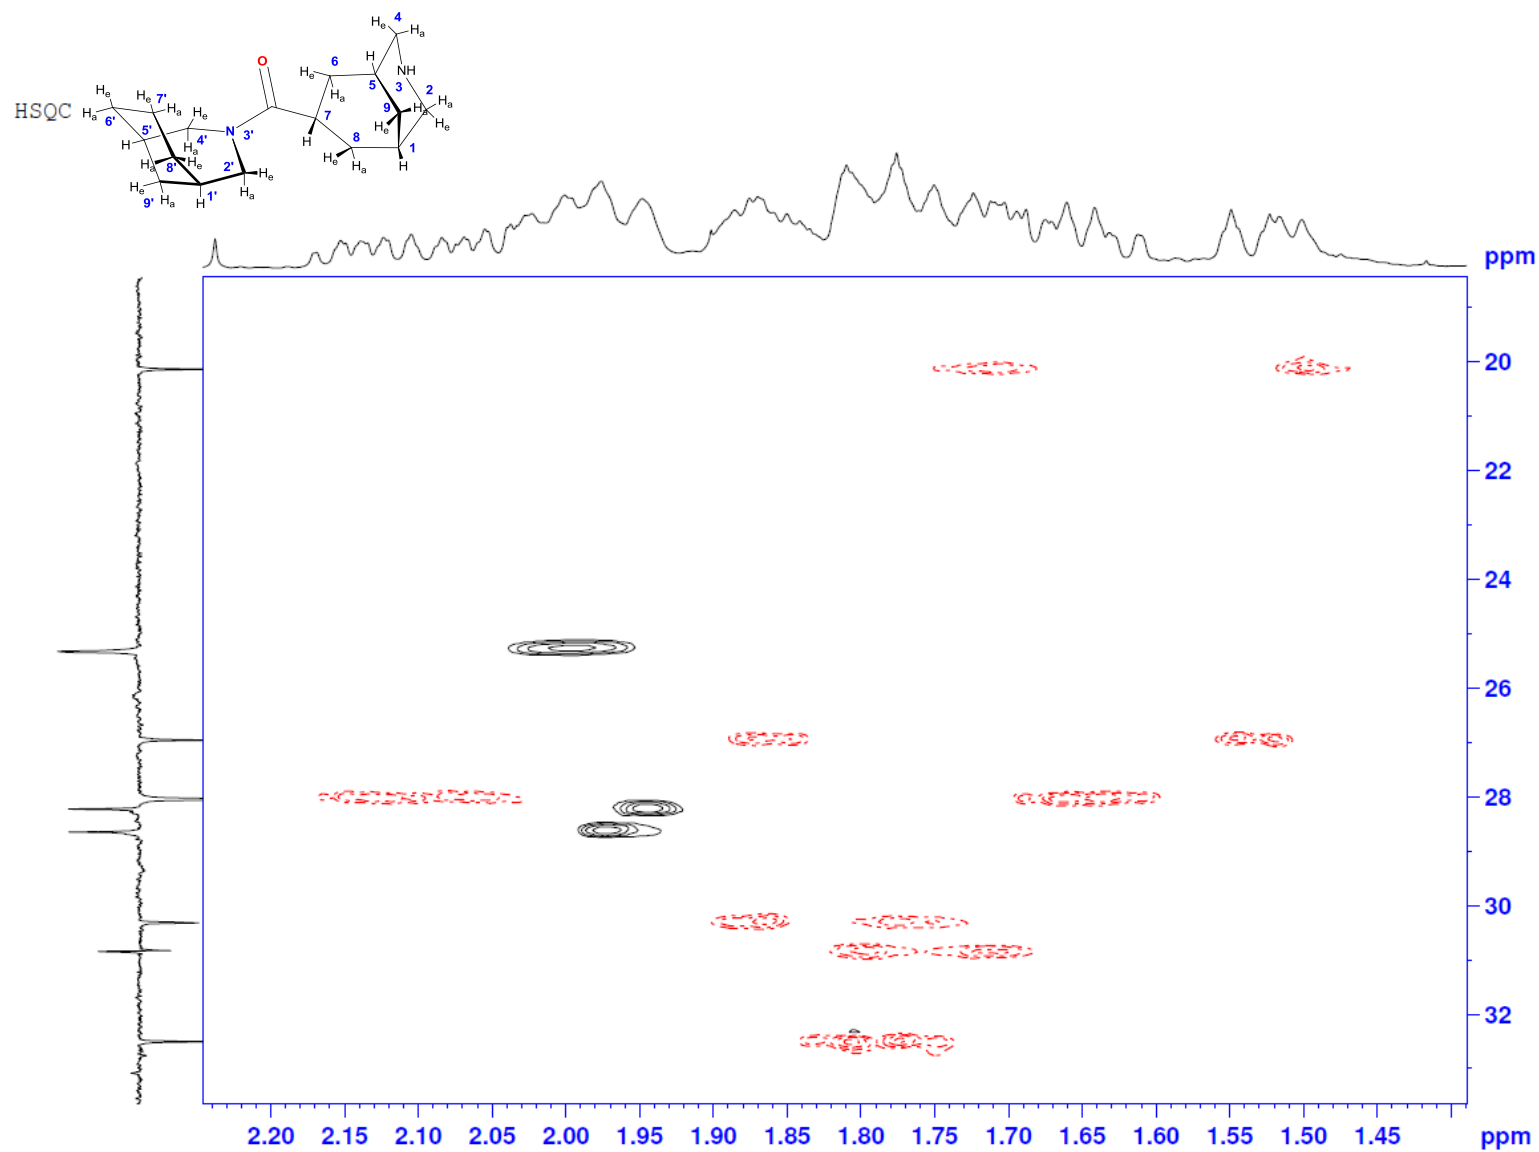

Figure S24. C,H-HSQC spectrum of compound 14 (expansion).

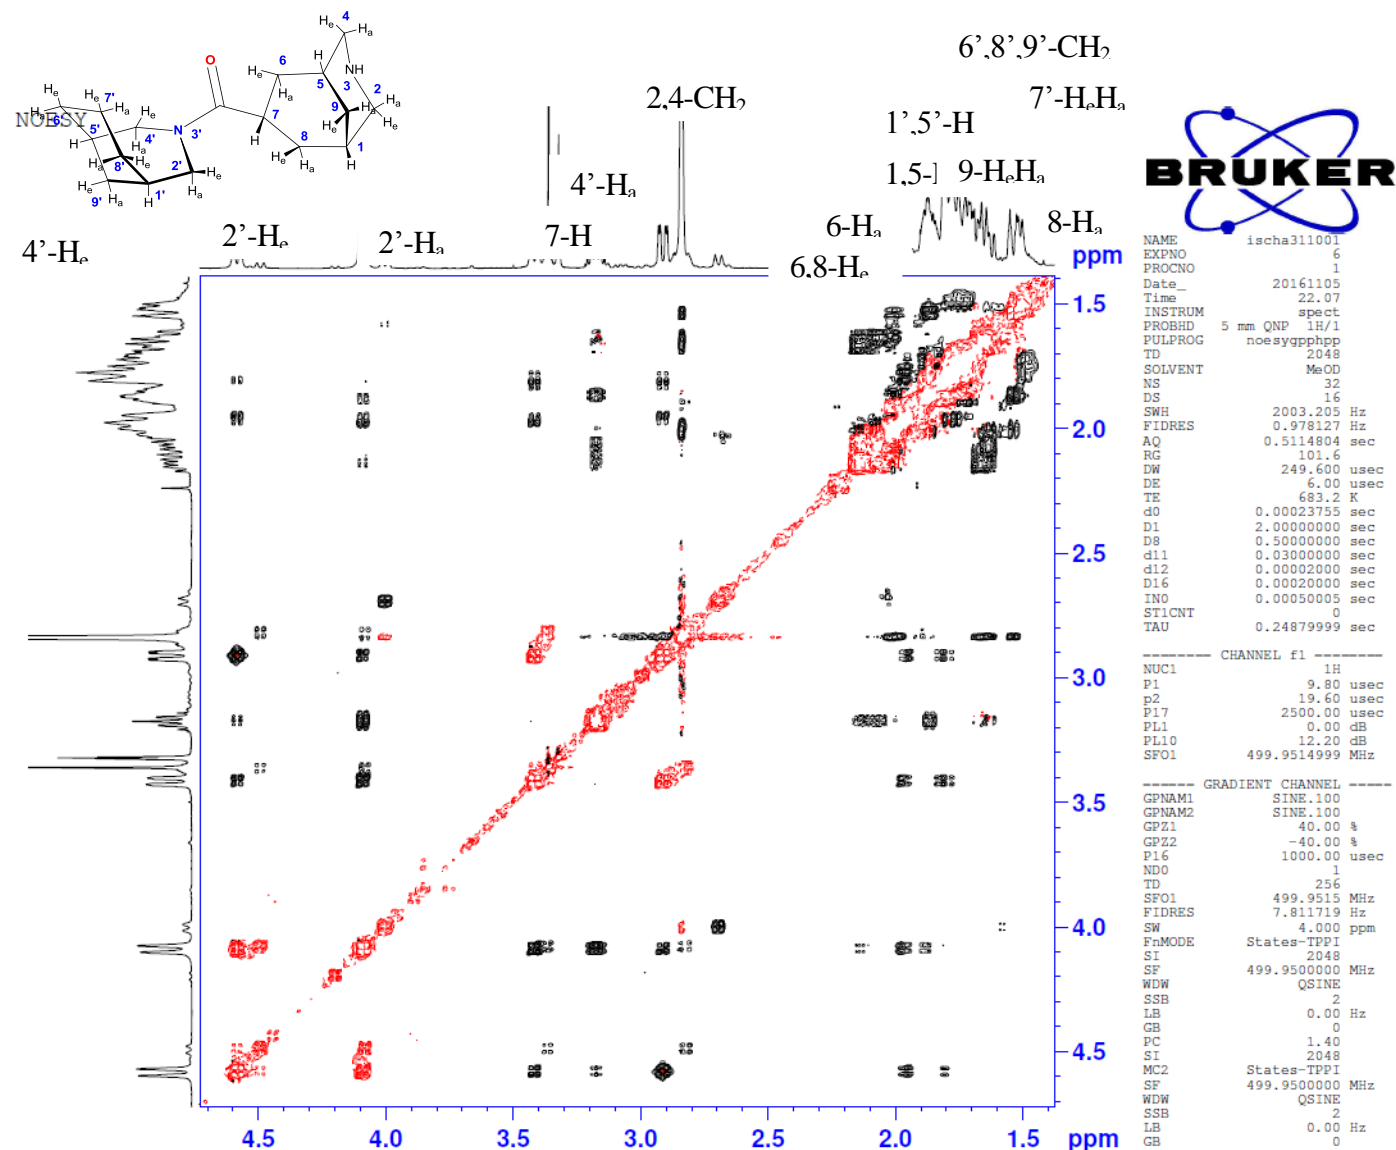

Figure S25. NOESY spectrum of compound 14.

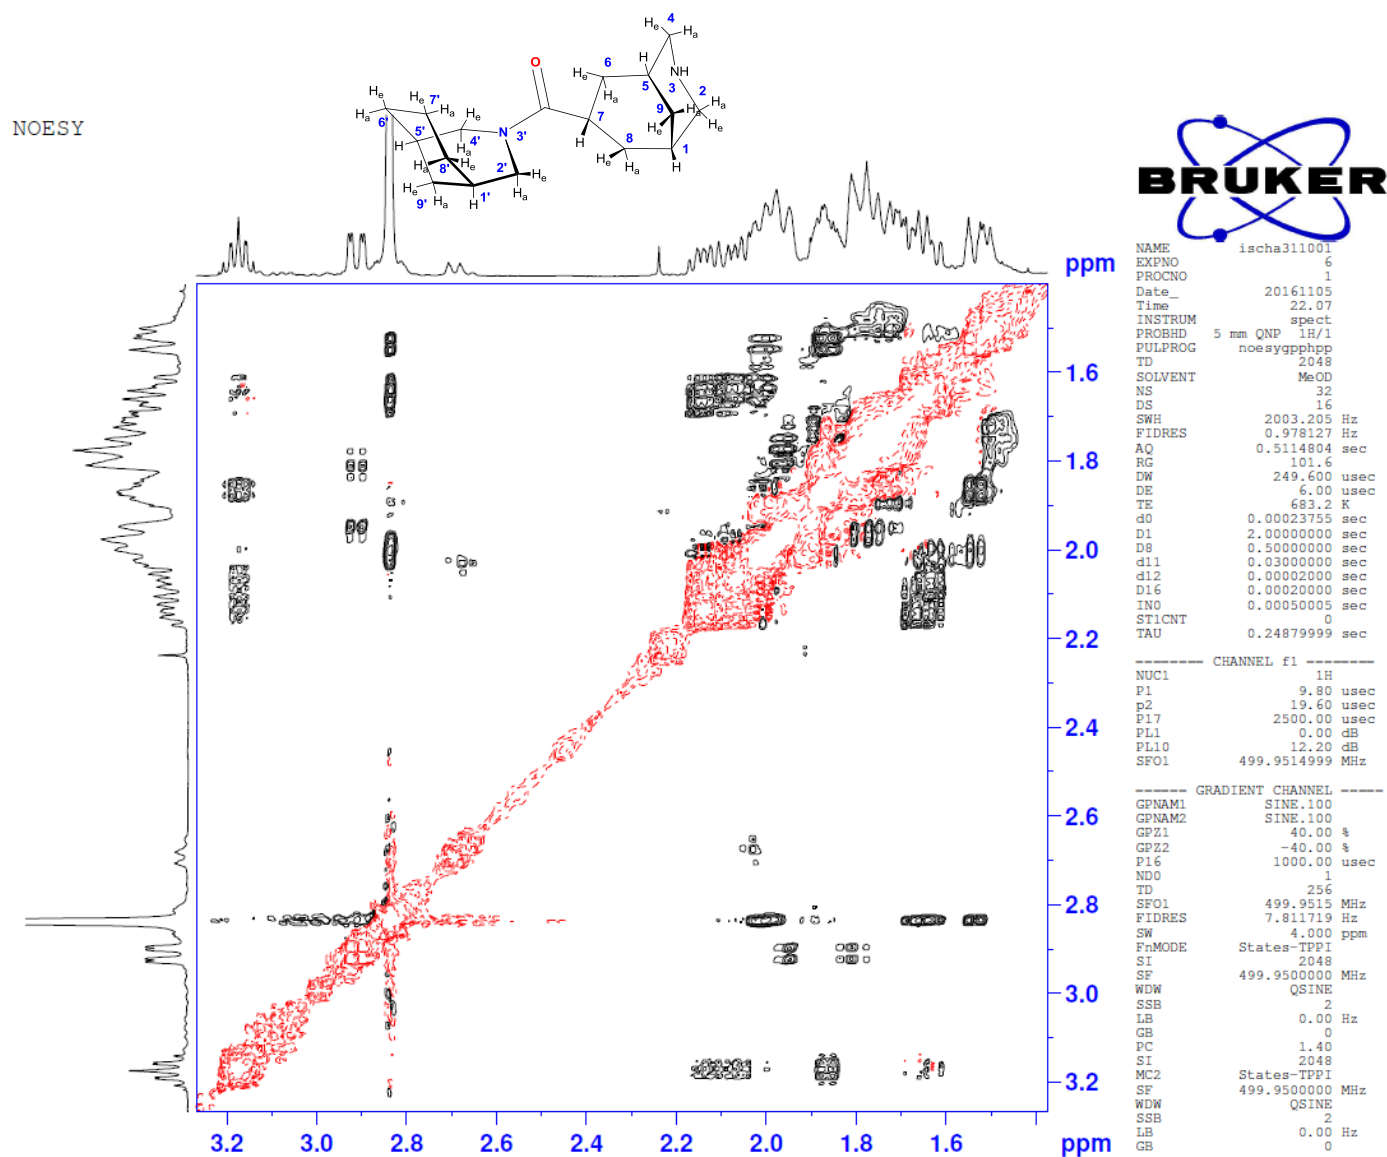

Figure S26. NOESY spectrum of compound 14 (expansion).

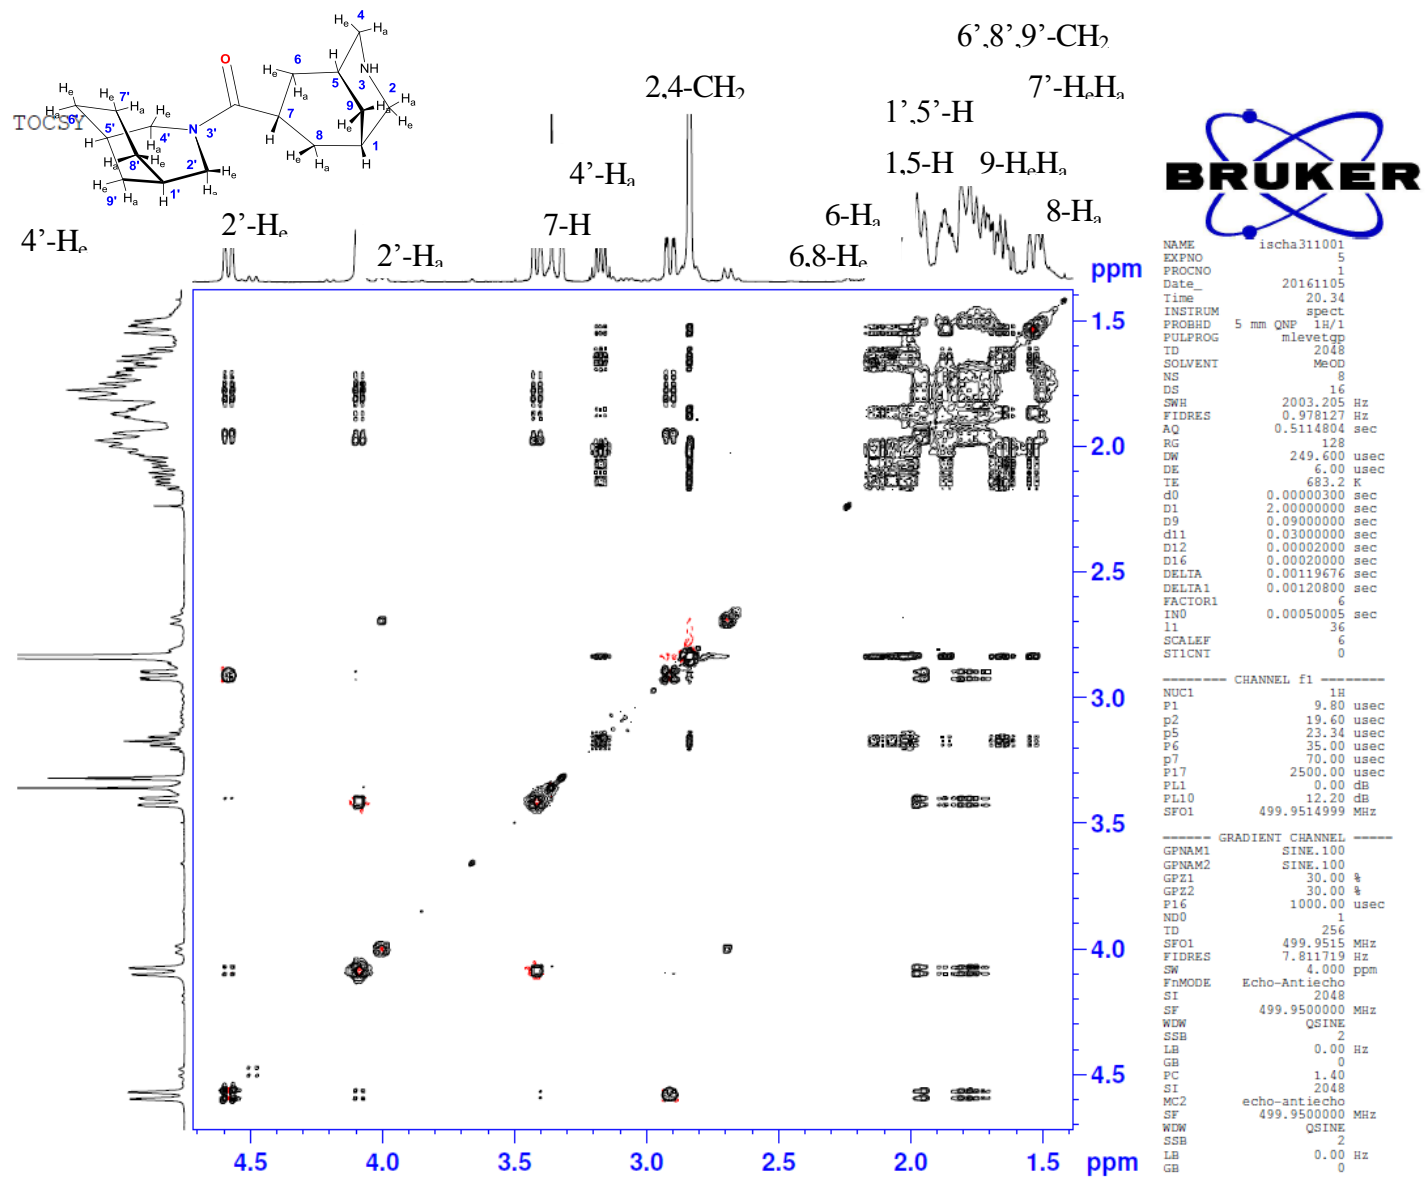

Figure S27. TOCSY spectrum of compound 14.

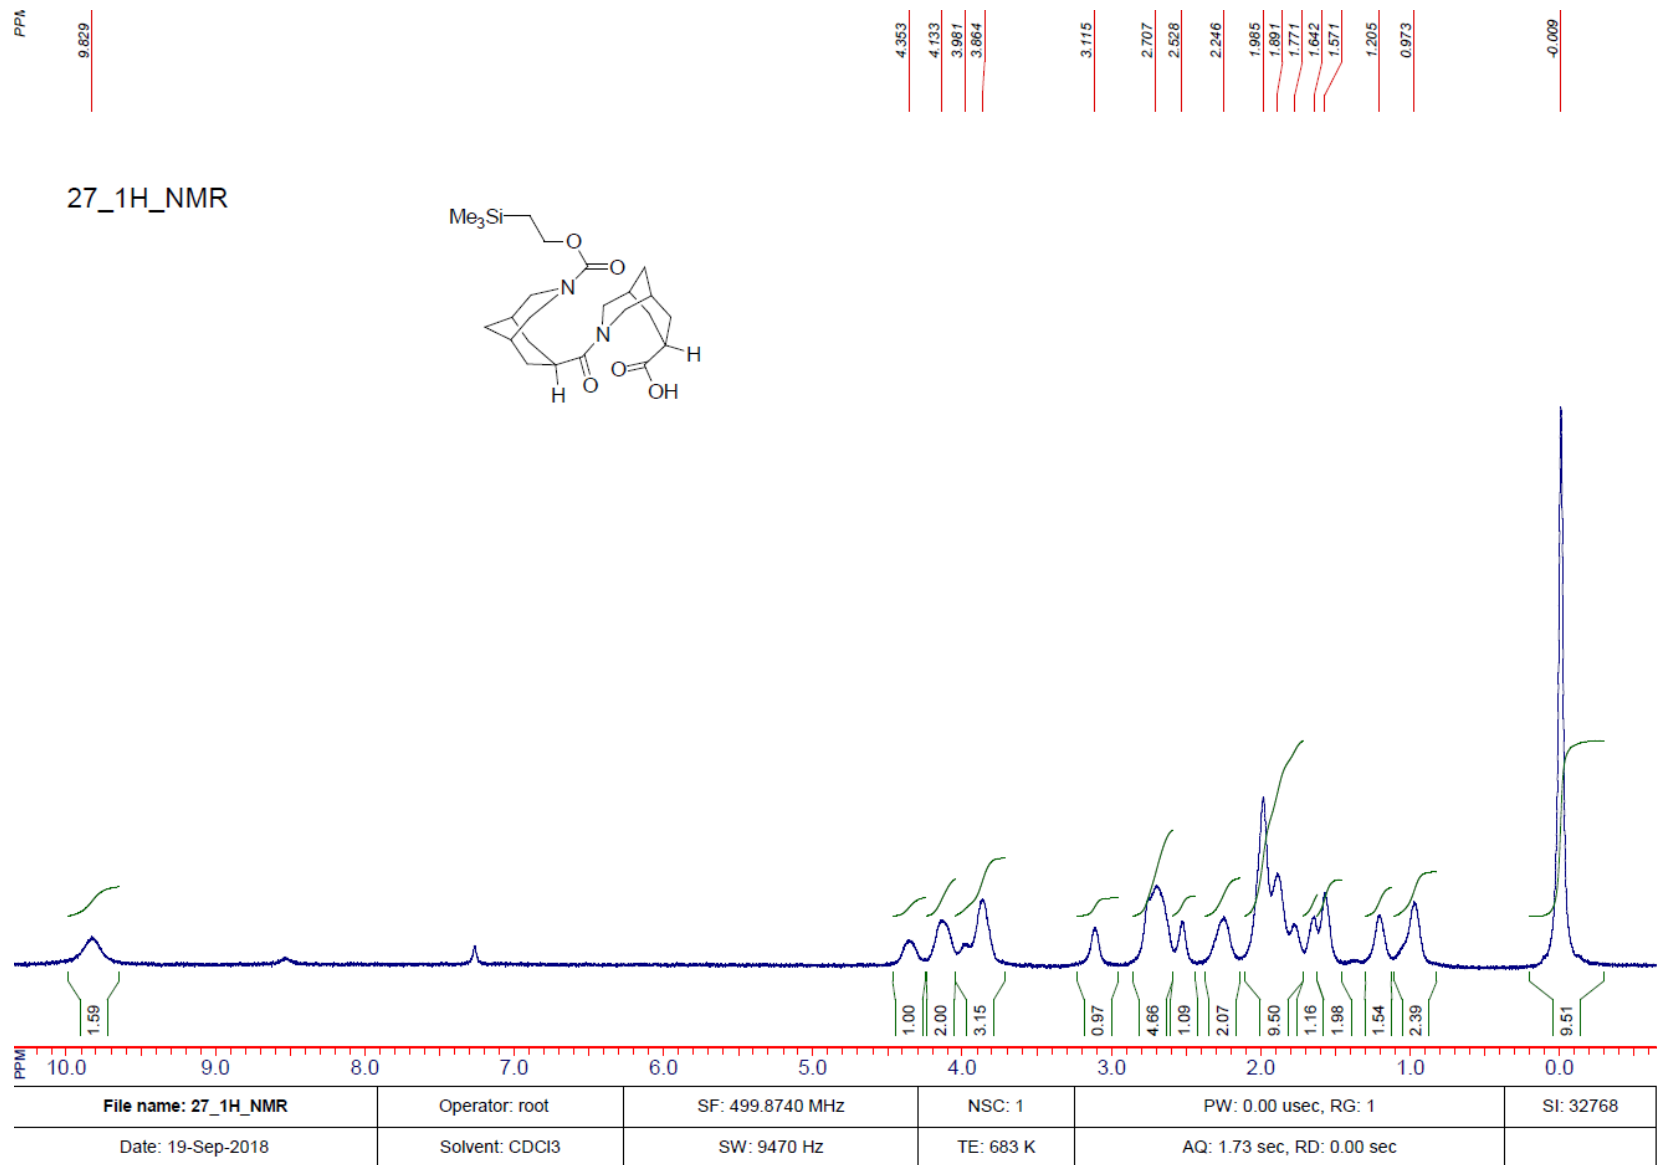

Figure S28.  $^1\text{H}$ -NMR spectrum of compound 27.

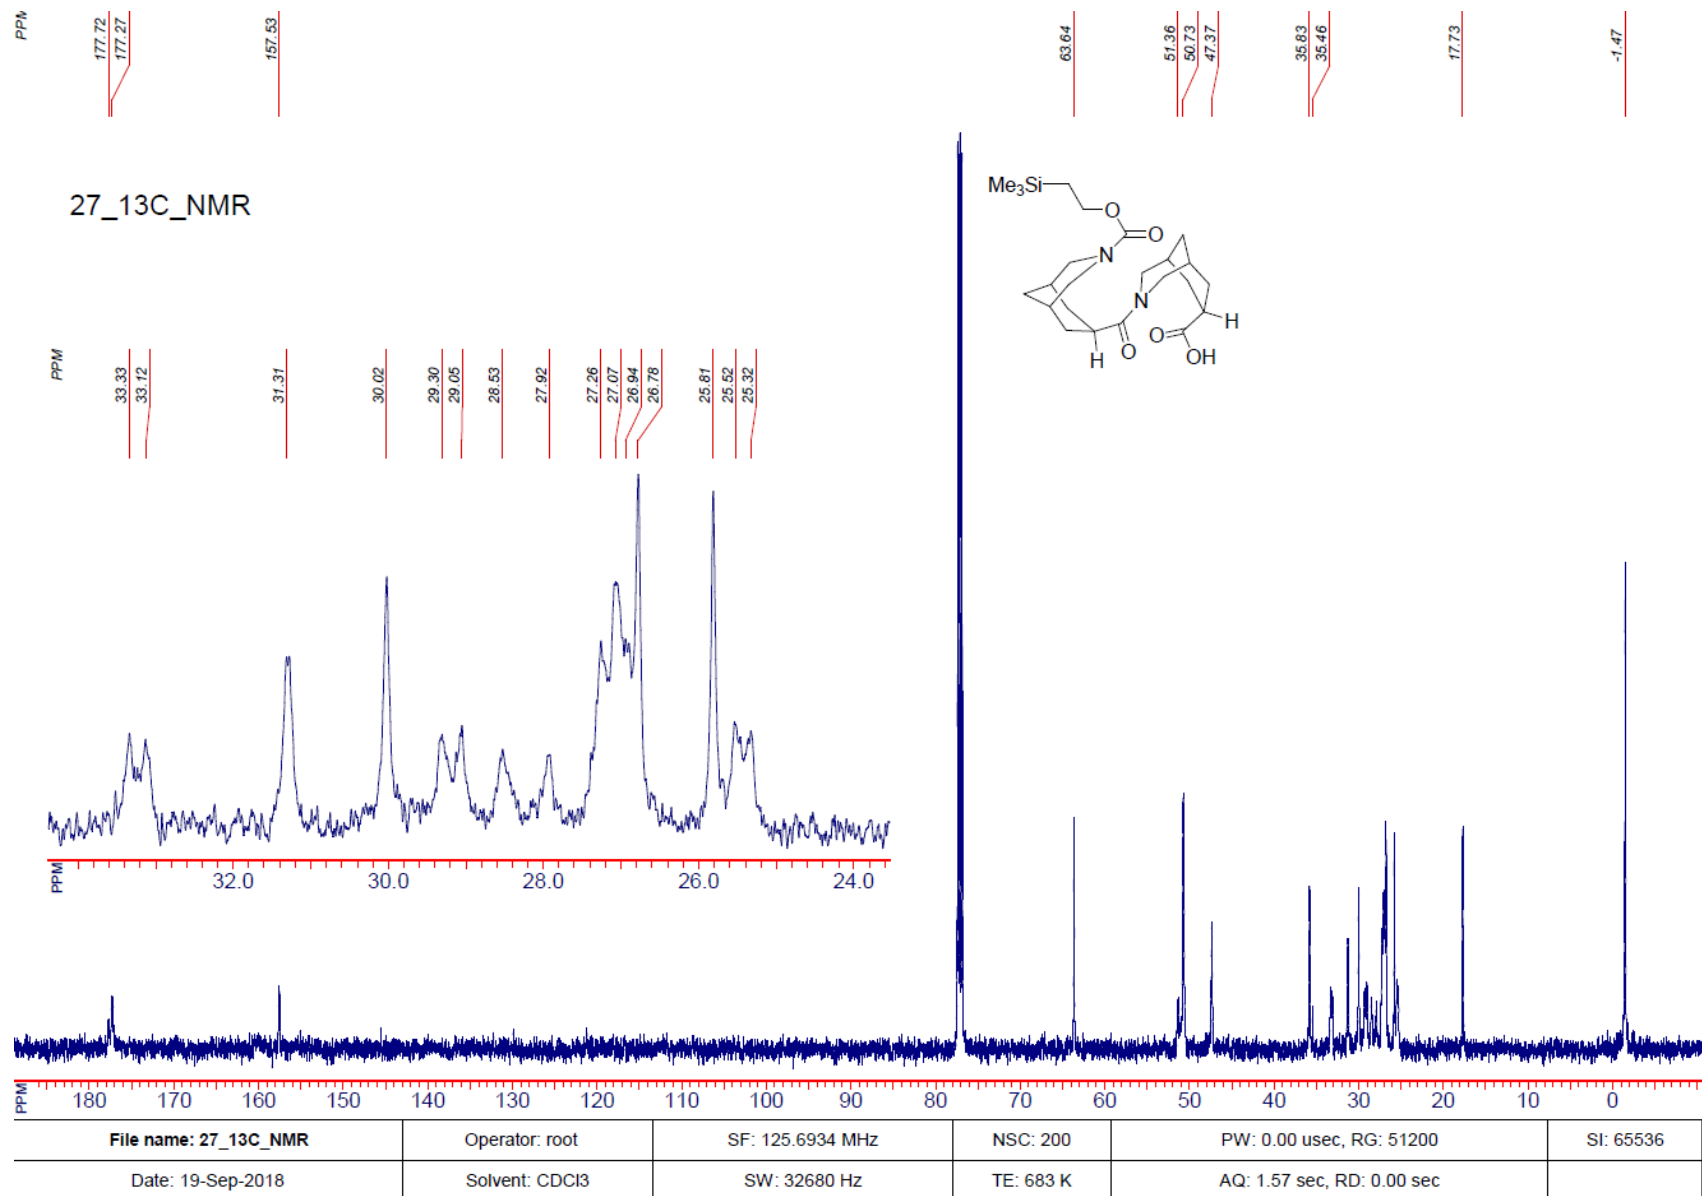

Figure S29.  $^{13}\text{C}$ -NMR spectrum of compound 27.

MaxPeak: 96.00%  
Ret\_Time: 1.592 min

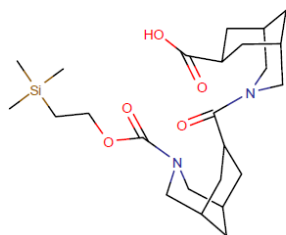

Mol Wt 464.67  
Exact Mass 464.33

| # | Time  | Area% |
|---|-------|-------|
| 1 | 1.592 | 96.00 |
| 2 | 1.615 | 4.00  |

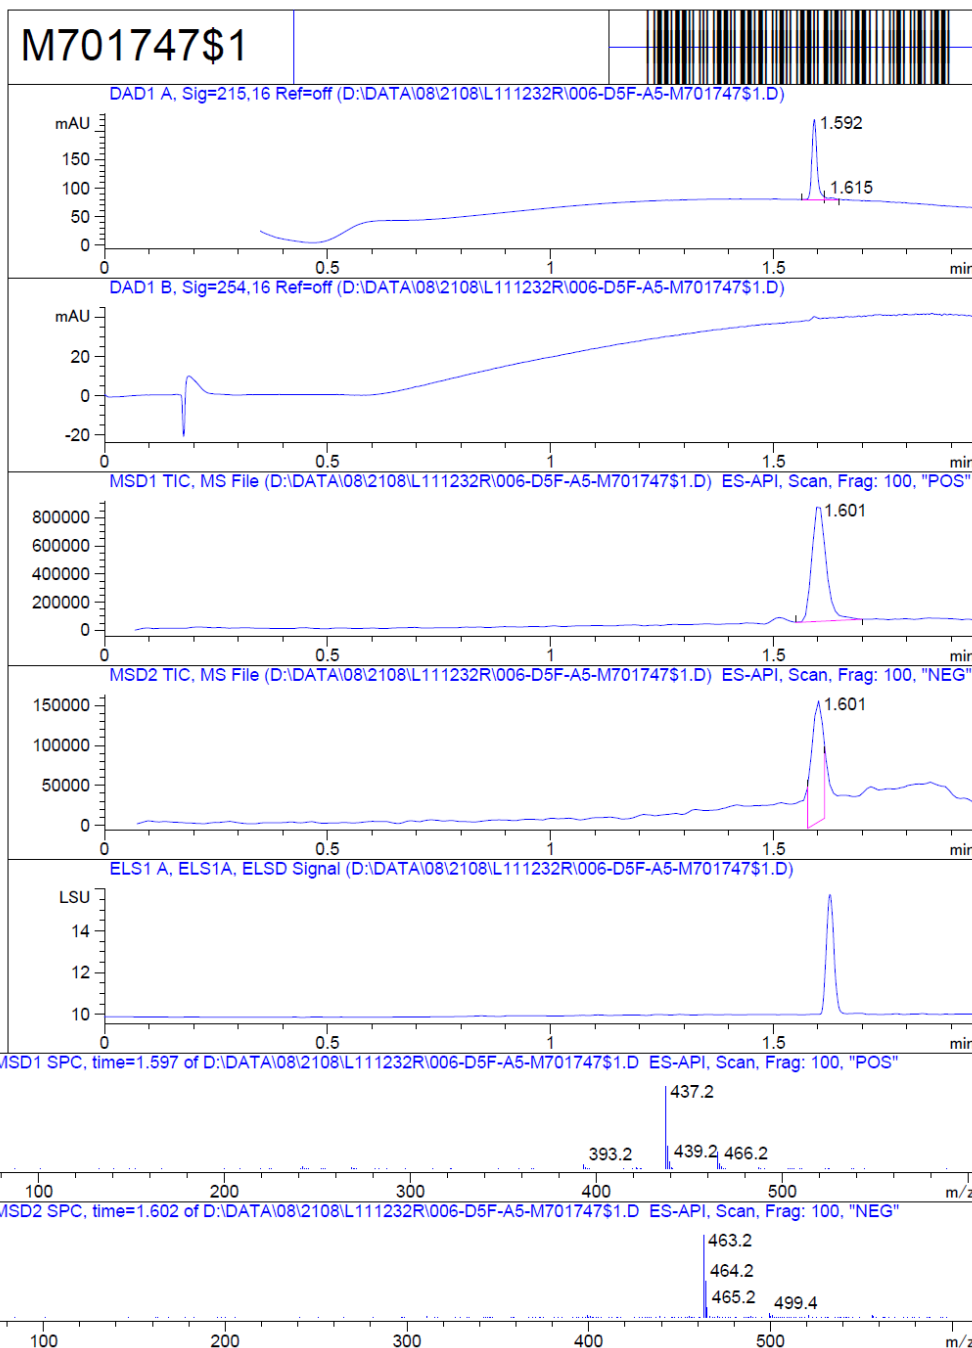

Inj.Date 8/21/2018

LB

<invalid> -16-

Acq. Method C:\Chem32\> ->

Figure S30. LC-MS trace of compound 27.

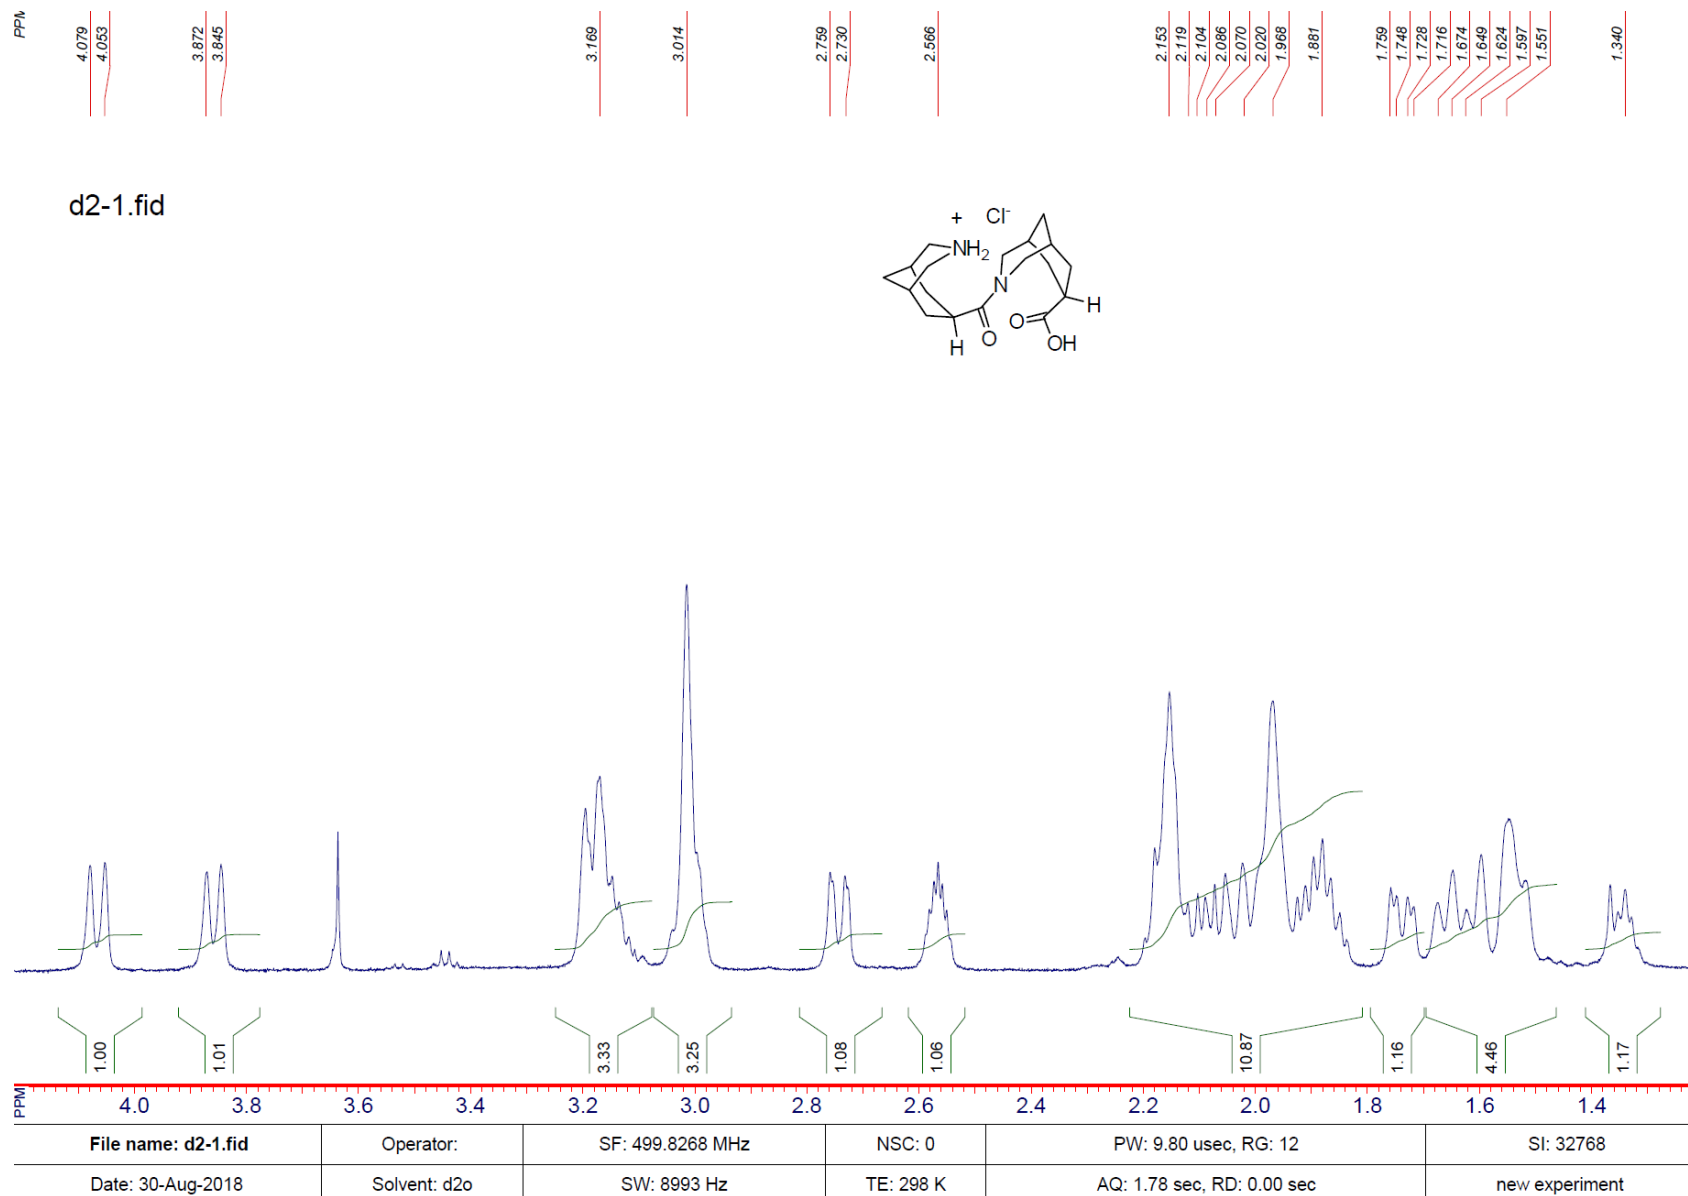

Figure S31.  $^1\text{H}$ -NMR spectrum of compound 2HCl.



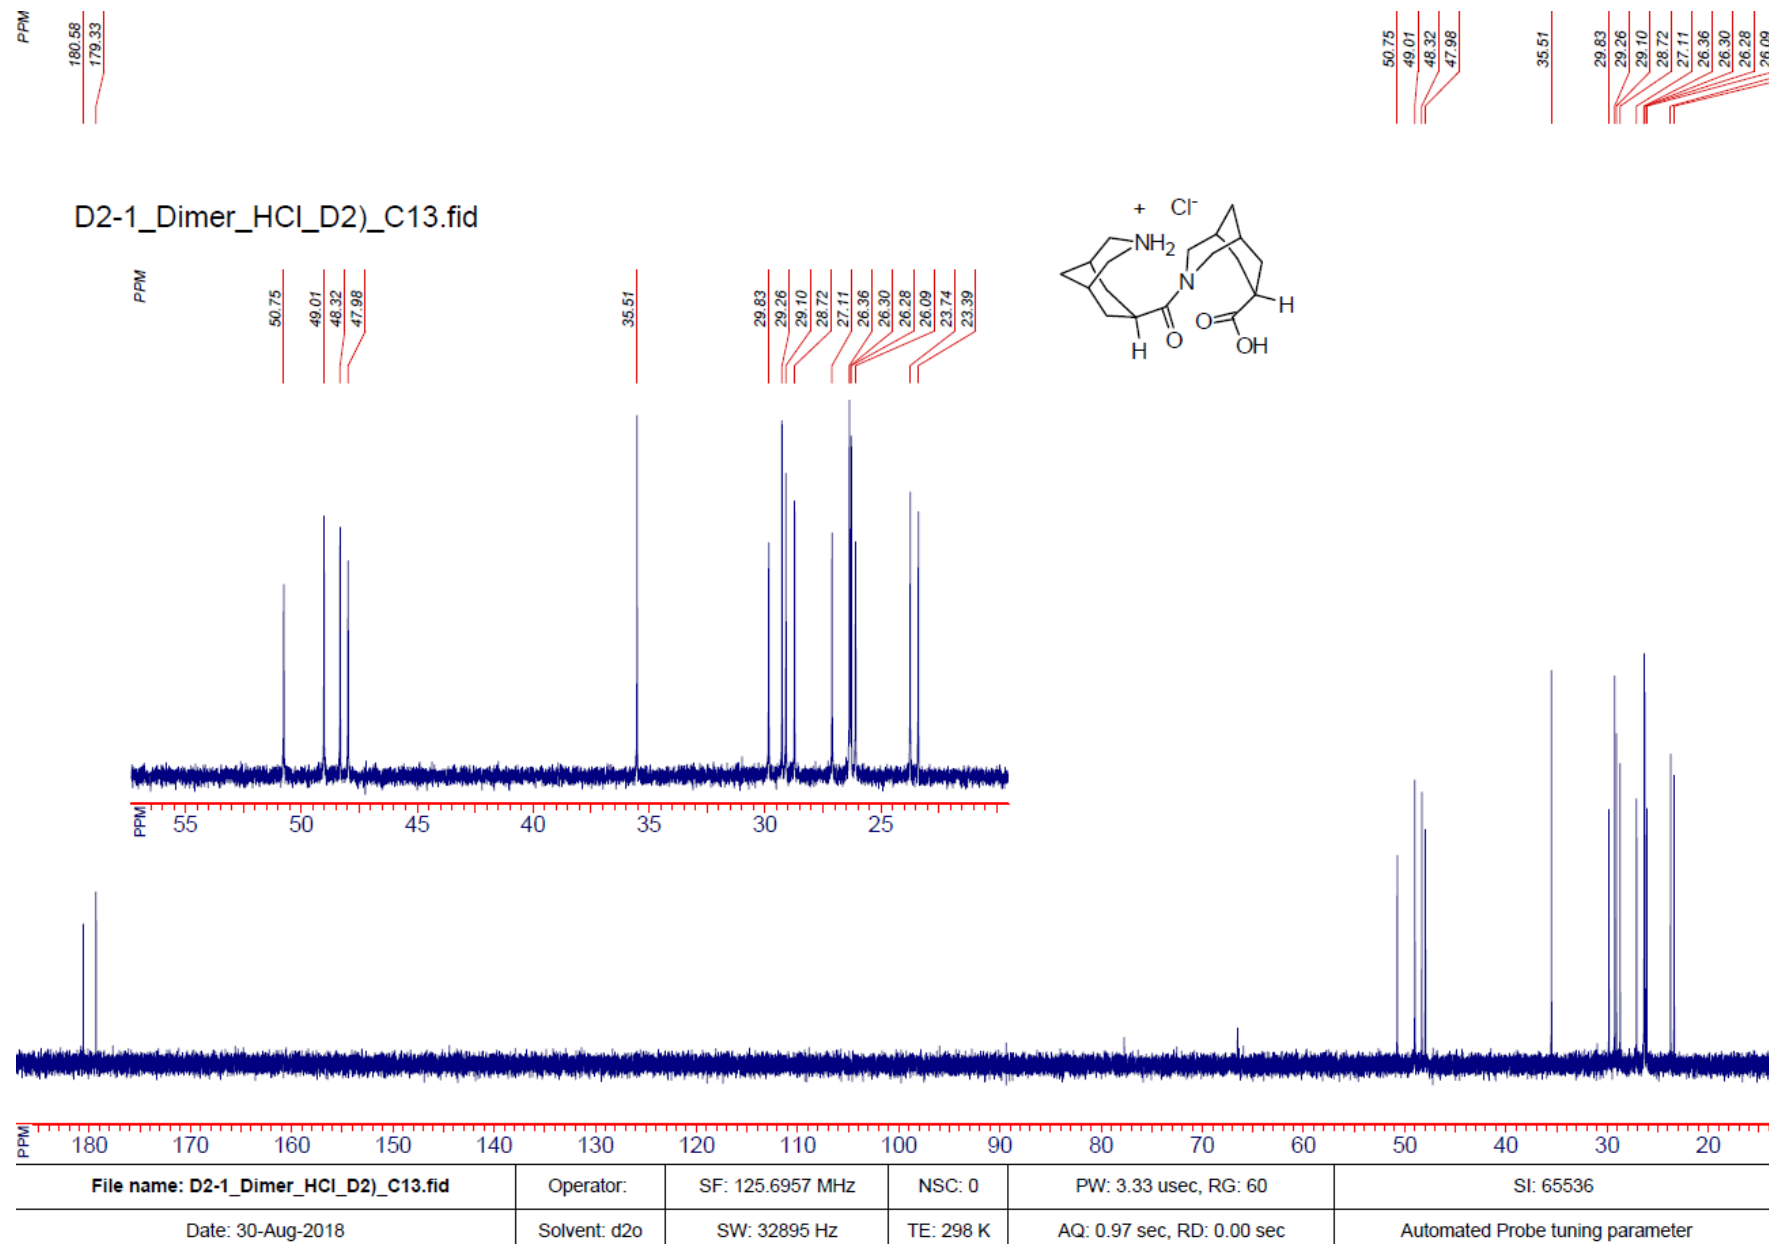

Figure S32. <sup>13</sup>C-NMR spectrum of compound 2.HCl.

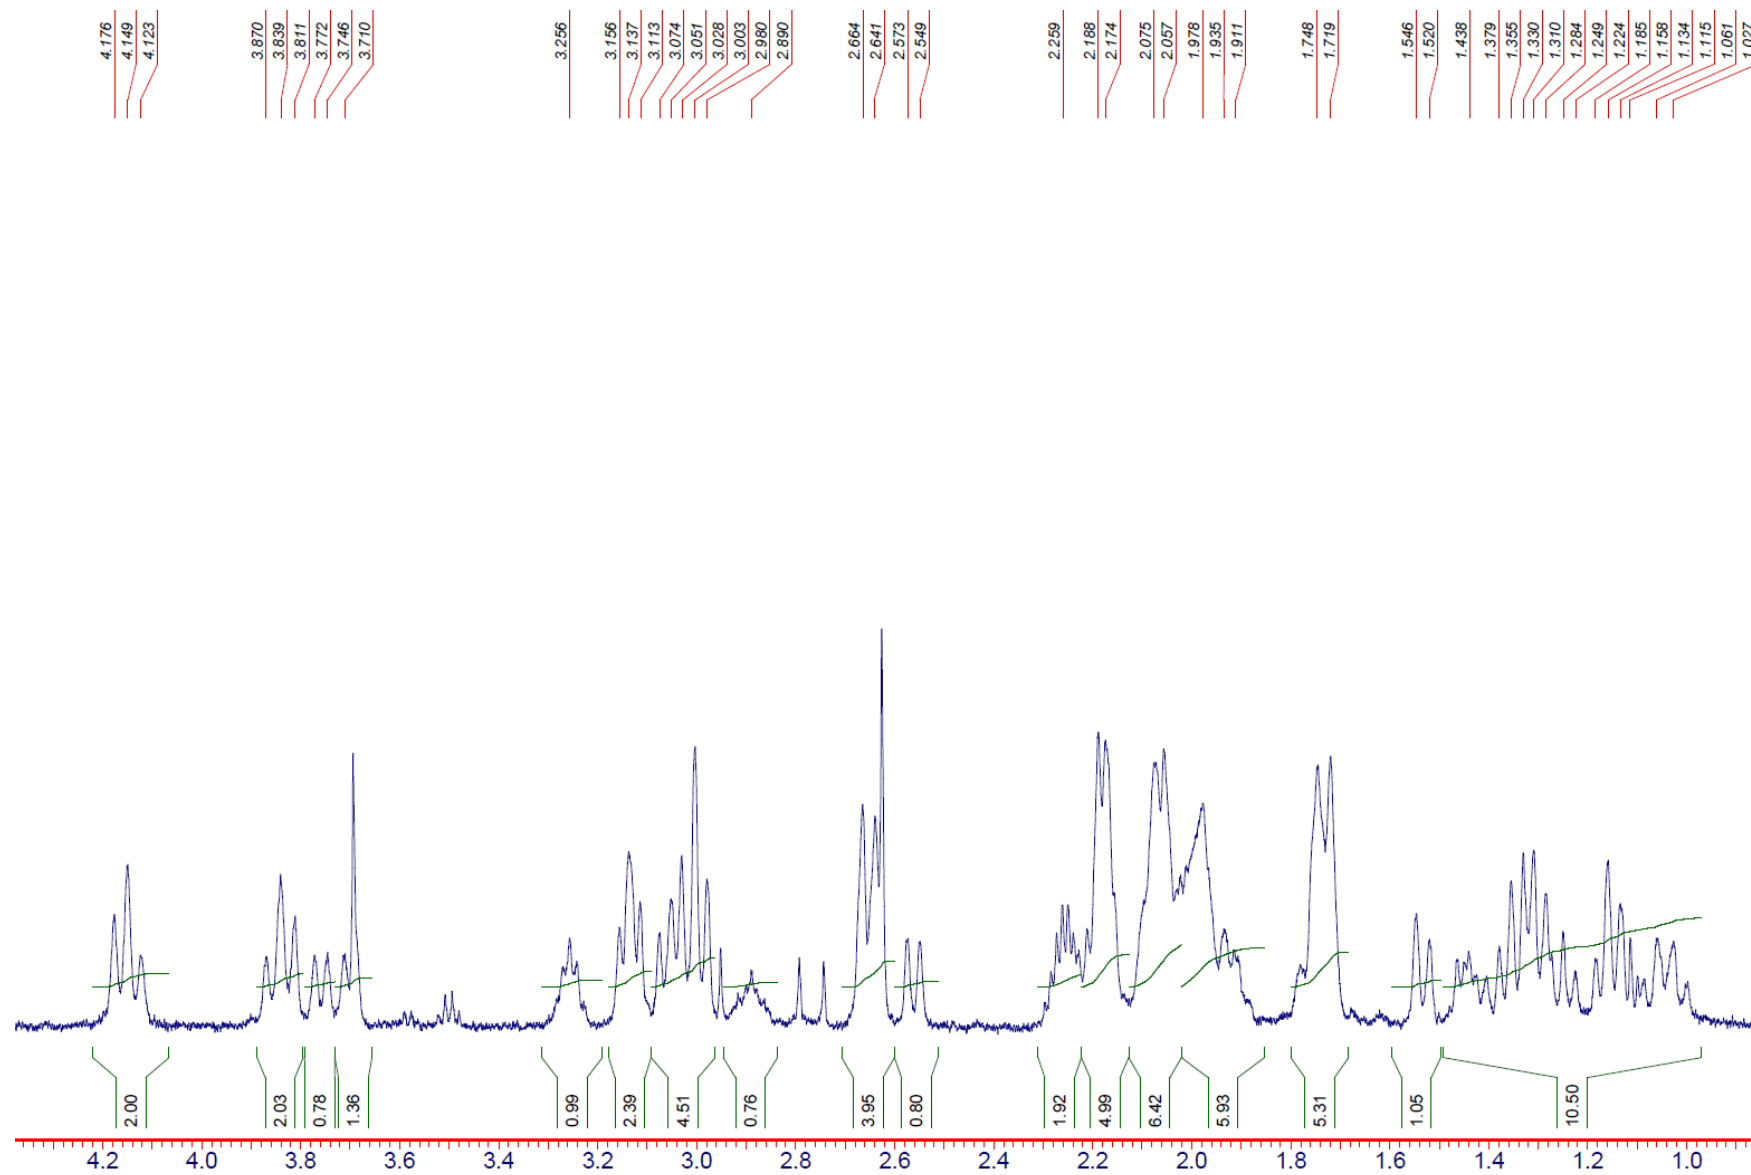

**Figure S33.**  $^1\text{H}$ -NMR spectrum of the solution of **2** in carbonate  $\text{D}_2\text{O}$  buffer (pD 10.68) immediately after the preparation.

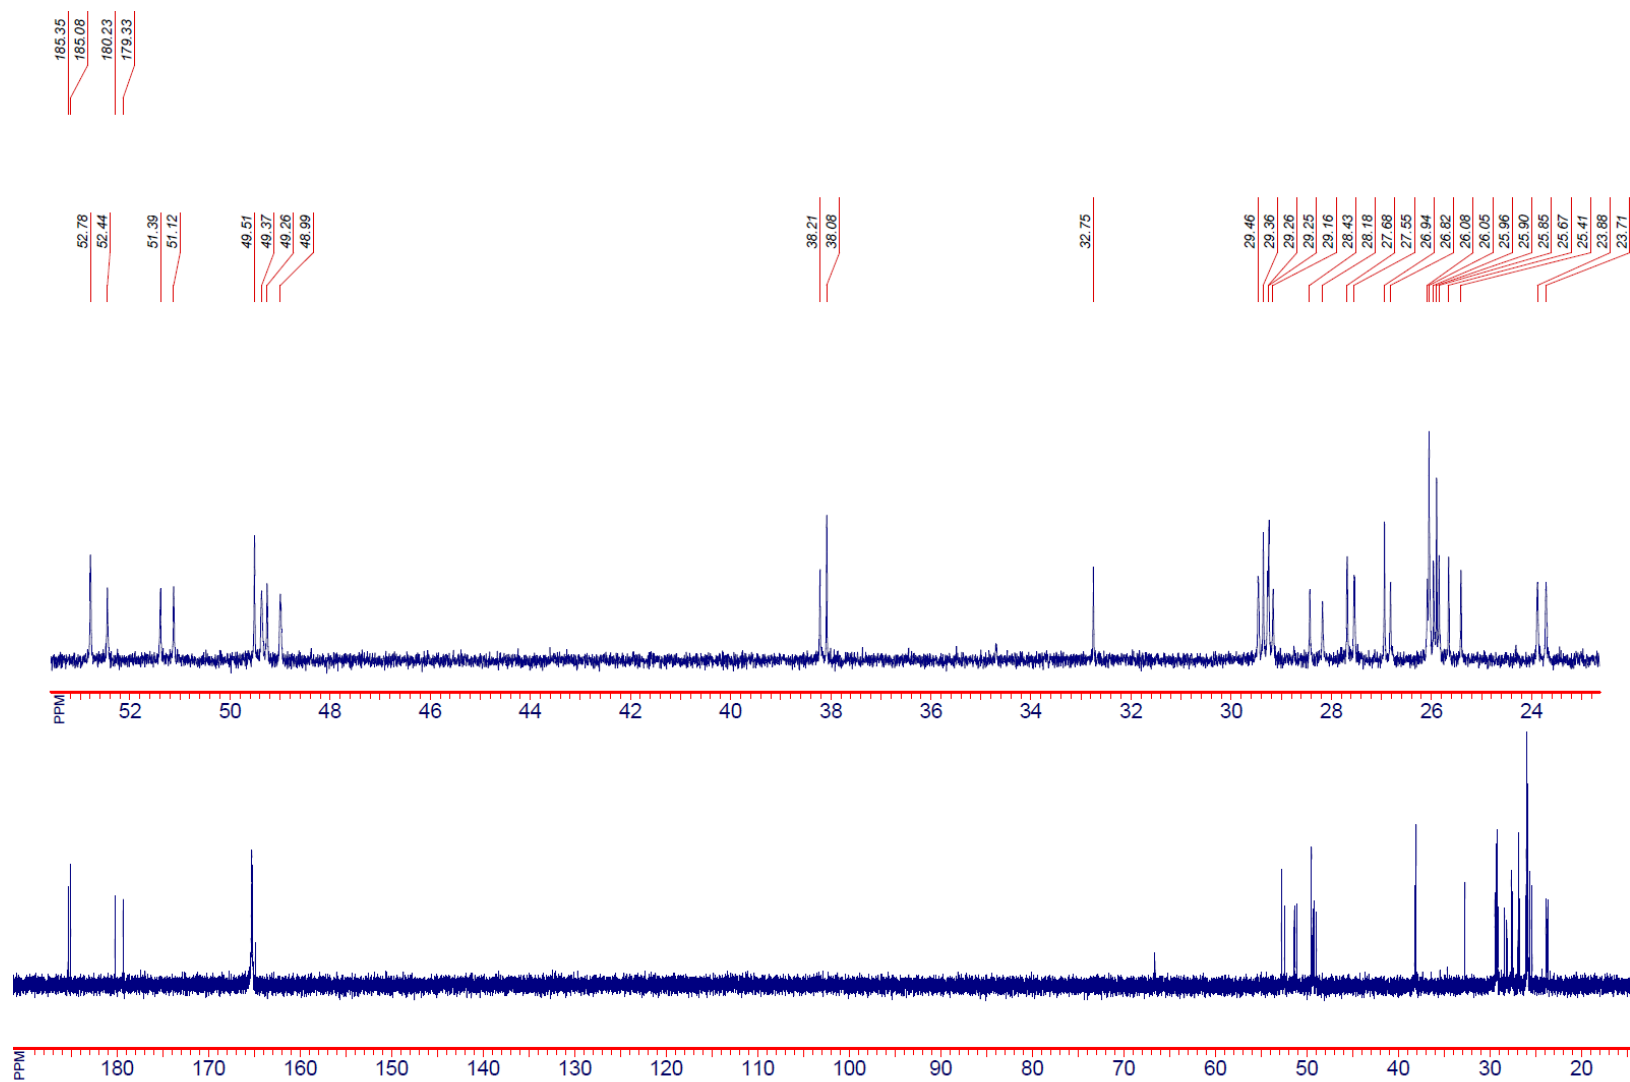

**Figure S34.**  $^{13}\text{C}$ -NMR spectrum of the solution of **2** in carbonate  $\text{D}_2\text{O}$  buffer (pD 10.68) immediately after the preparation.

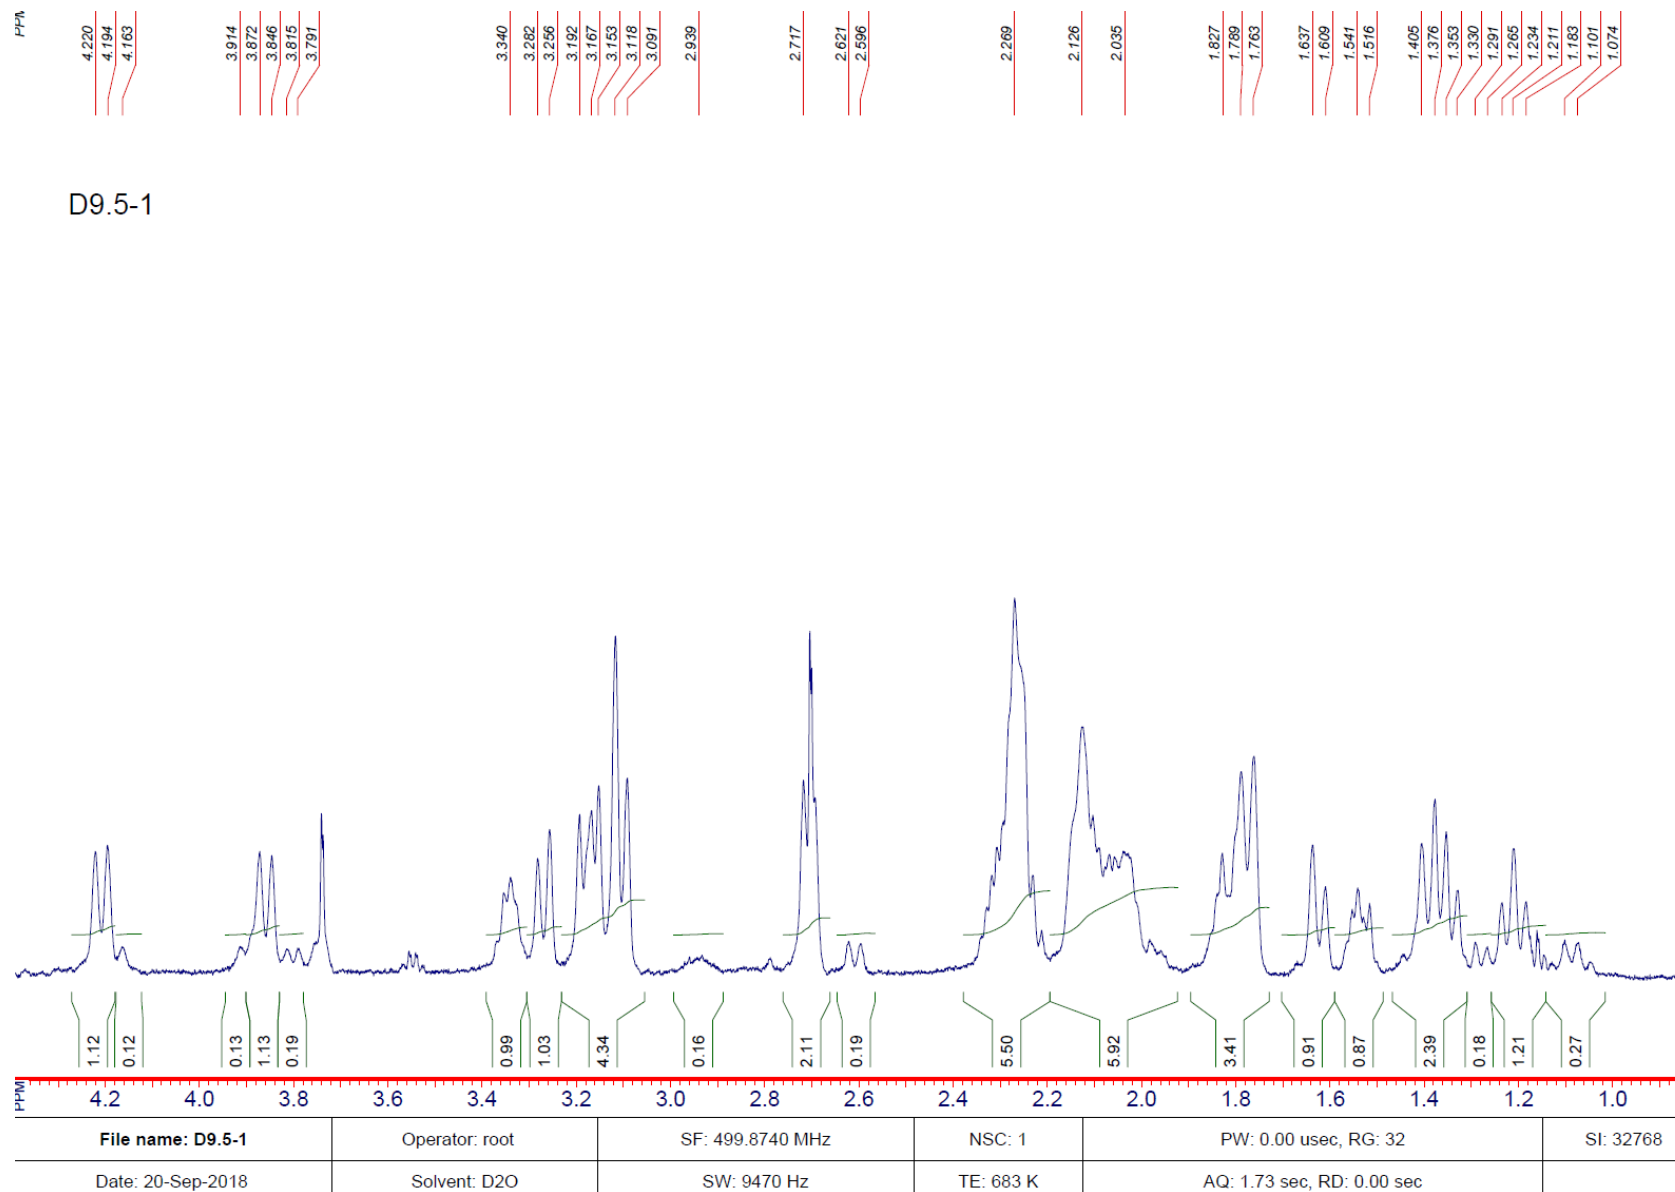

**Figure S35.**  $^1\text{H}$ -NMR spectrum of the solution of **2** in carbonate  $\text{D}_2\text{O}$  buffer (pD9.45) immediately after the preparation.

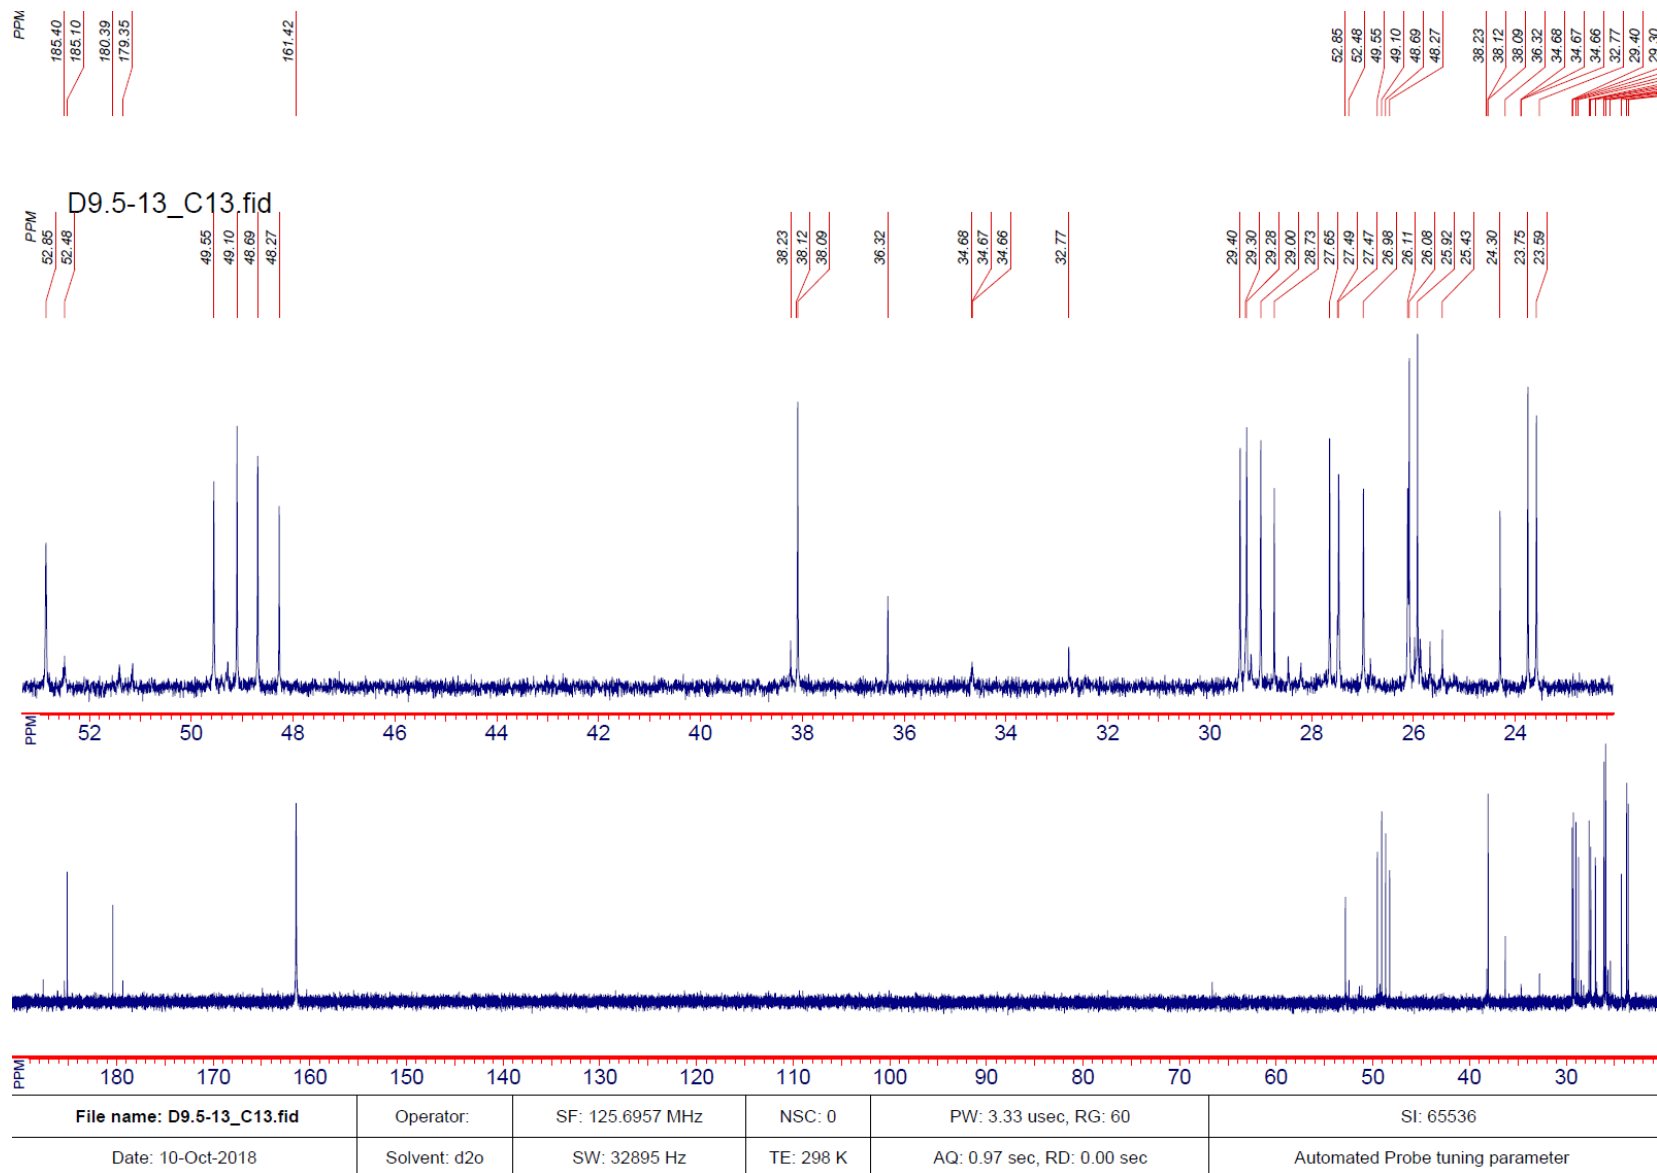

**Figure S36.**  $^{13}\text{C}$ -NMR spectrum of the solution of **2** in carbonate  $\text{D}_2\text{O}$  buffer (pD9.45) immediately after the preparation.

# Kinetic data on the hydrolysis of 2-HCl in acetate D<sub>2</sub>O buffer, pD 3.81.

**Table S1.** Molar percent of 2-HCl vs time (min) in acetate buffer (pD 3.81, 23 °C)

|                  |     |     |      |      |      |       |       |       |       |
|------------------|-----|-----|------|------|------|-------|-------|-------|-------|
| Time, min        | 0   | 273 | 3105 | 4606 | 7168 | 10950 | 15848 | 16127 | 17131 |
| Molar % of 2-HCl | 100 | 97  | 81   | 79   | 74   | 61    | 57    | 51    | 49    |

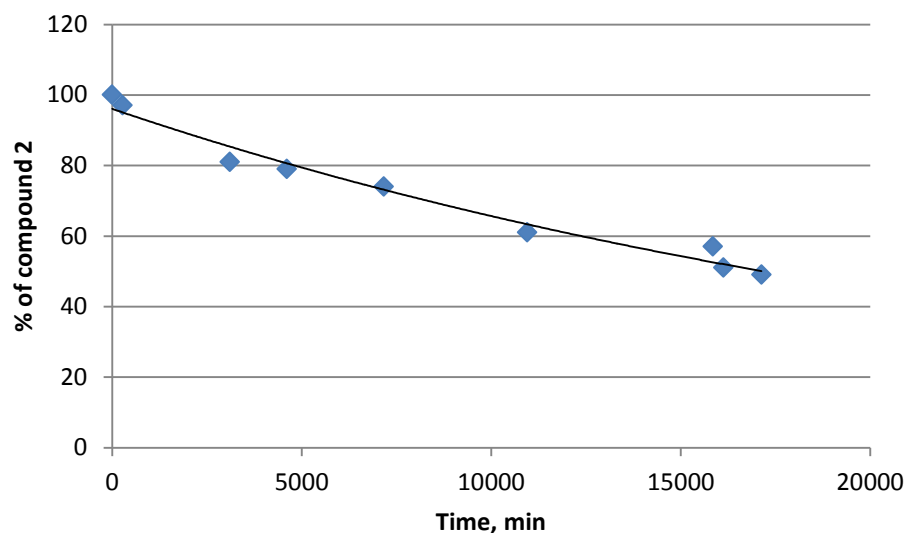

**Figure S37.** Exponential fit of the data (Table S1).

**Table S2.** Fitting parameters and corresponding kinetic constants.

| Equation                  | y0                   | A1                    | t1                         | R <sup>2</sup> | Half-life, t <sub>1/2</sub> , min | k <sub>obs</sub> , min <sup>-1</sup> | log(k <sub>obs</sub> ) |
|---------------------------|----------------------|-----------------------|----------------------------|----------------|-----------------------------------|--------------------------------------|------------------------|
| $y = A1 \exp(-x/t1) + y0$ | 34,43121±<br>11,0332 | 63,99936±<br>10,30033 | 12830,87499±<br>4149,08408 | 0,97726        | 18138                             | 3.821·10 <sup>-5</sup>               | -4.418                 |

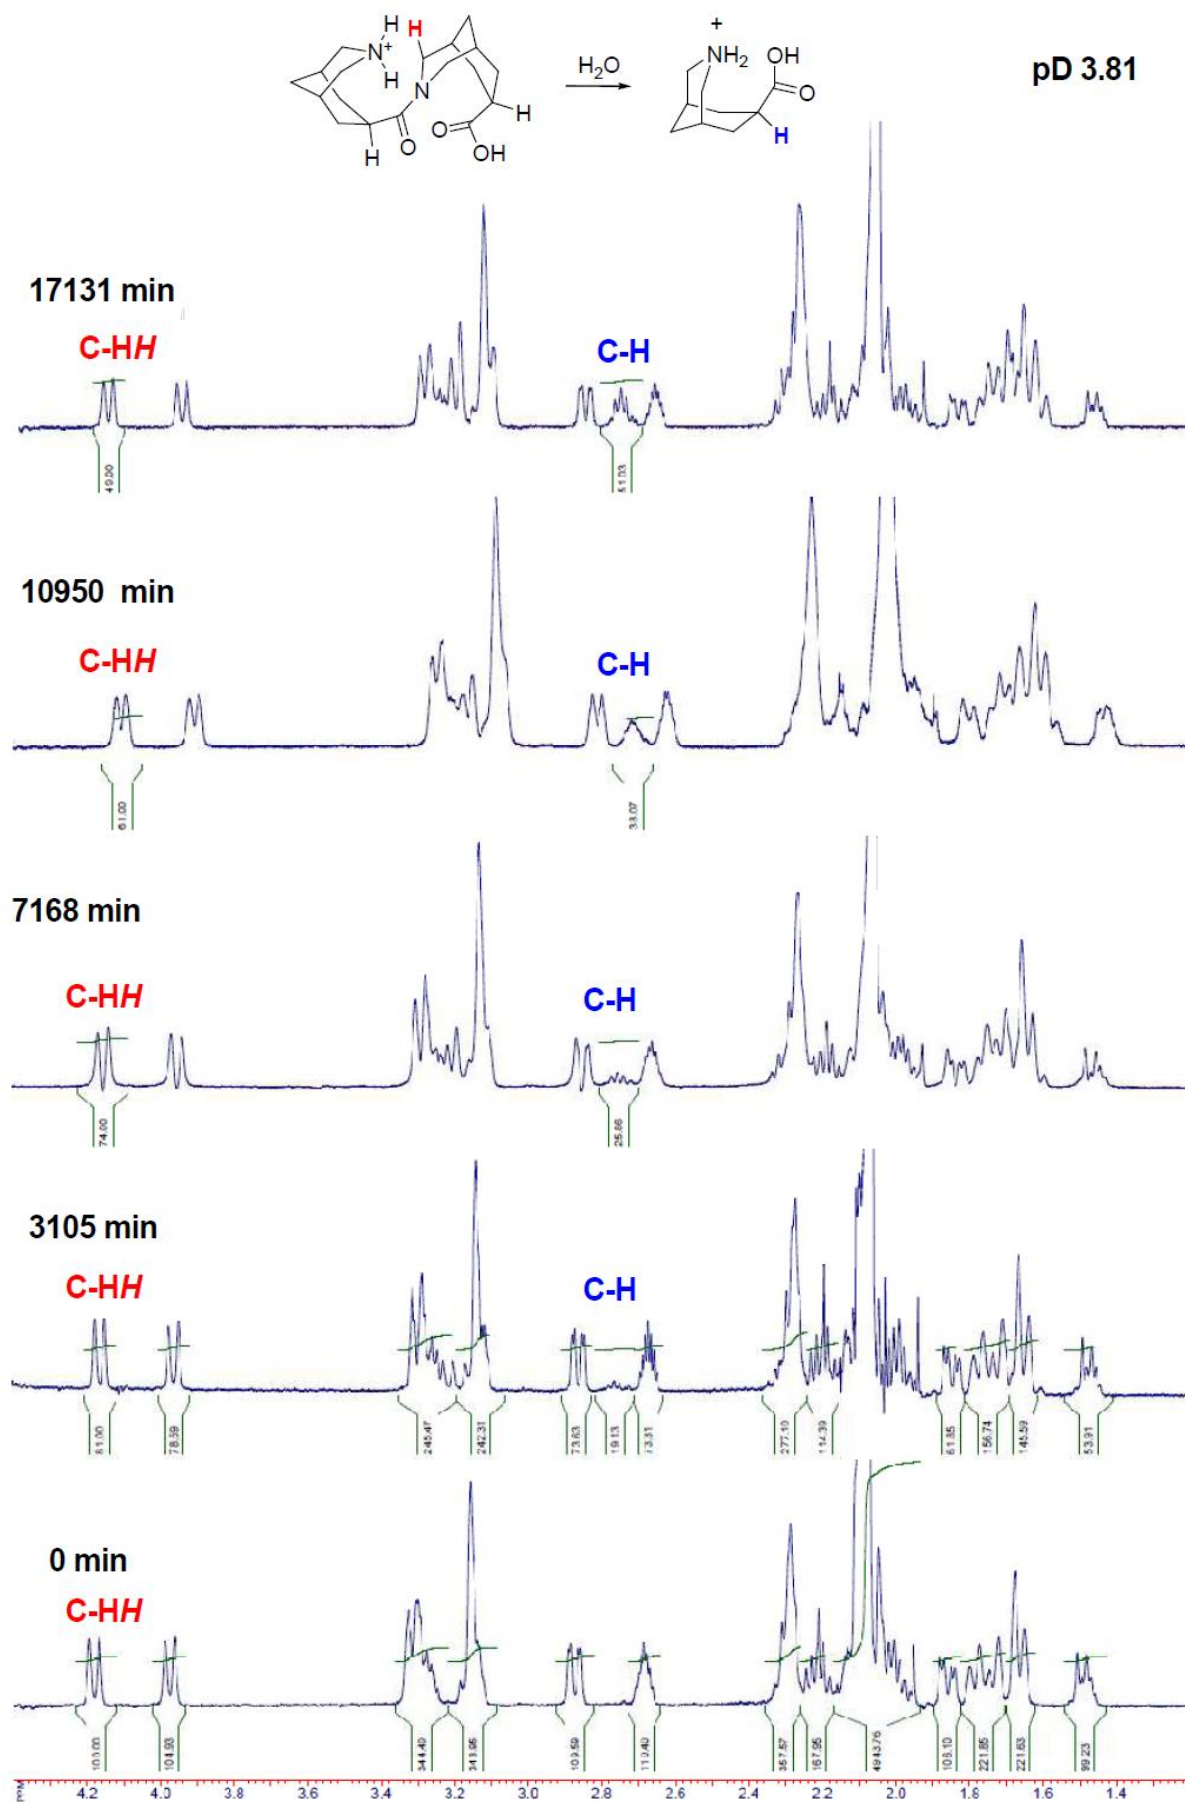

**Figure S38.** Representative spectral data set for hydrolysis of 2-HCl in acetate D<sub>2</sub>O buffer, pD 3.81, 23 °C.

# Kinetic data on the hydrolysis of 2HCl in acetate D<sub>2</sub>O buffer, pD4.85.

**Table S3.** Molar percent of 2HCl vs time (min) in acetate buffer (pD 4.85, 23 °C)

|                 |     |     |      |      |      |       |       |       |       |
|-----------------|-----|-----|------|------|------|-------|-------|-------|-------|
| Time, min       | 0   | 275 | 3110 | 4609 | 7150 | 10953 | 13148 | 16191 | 17136 |
| Molar % of 2HCl | 100 | 96  | 62   | 45   | 39   | 23    | 20    | 11    | 5     |

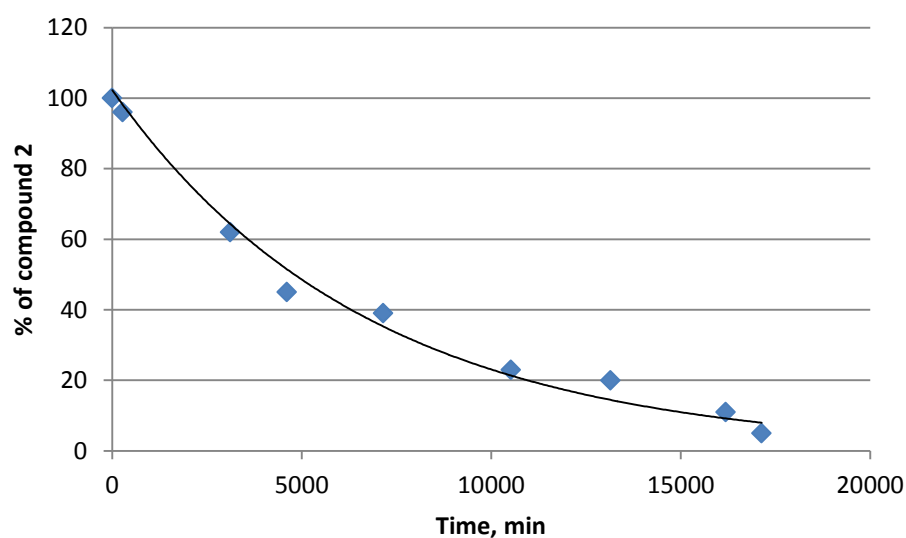

**Figure S39.** Exponential fit of the data (Table S3).

**Table S4.** Fitting parameters and corresponding kinetic constants.

| Equation                  | y0                 | A1                   | t1                       | R <sup>2</sup> | Half-life, t <sub>1/2</sub> , min | k <sub>obs</sub> , min <sup>-1</sup> | log(k <sub>obs</sub> ) |
|---------------------------|--------------------|----------------------|--------------------------|----------------|-----------------------------------|--------------------------------------|------------------------|
| $y = A1 \exp(-x/t1) + y0$ | 2,69584±<br>4,7715 | 96,60028±<br>4,81107 | 6537,81499±<br>895,81784 | 0,98792        | 4668                              | 1.485·10 <sup>-4</sup>               | -3.828                 |



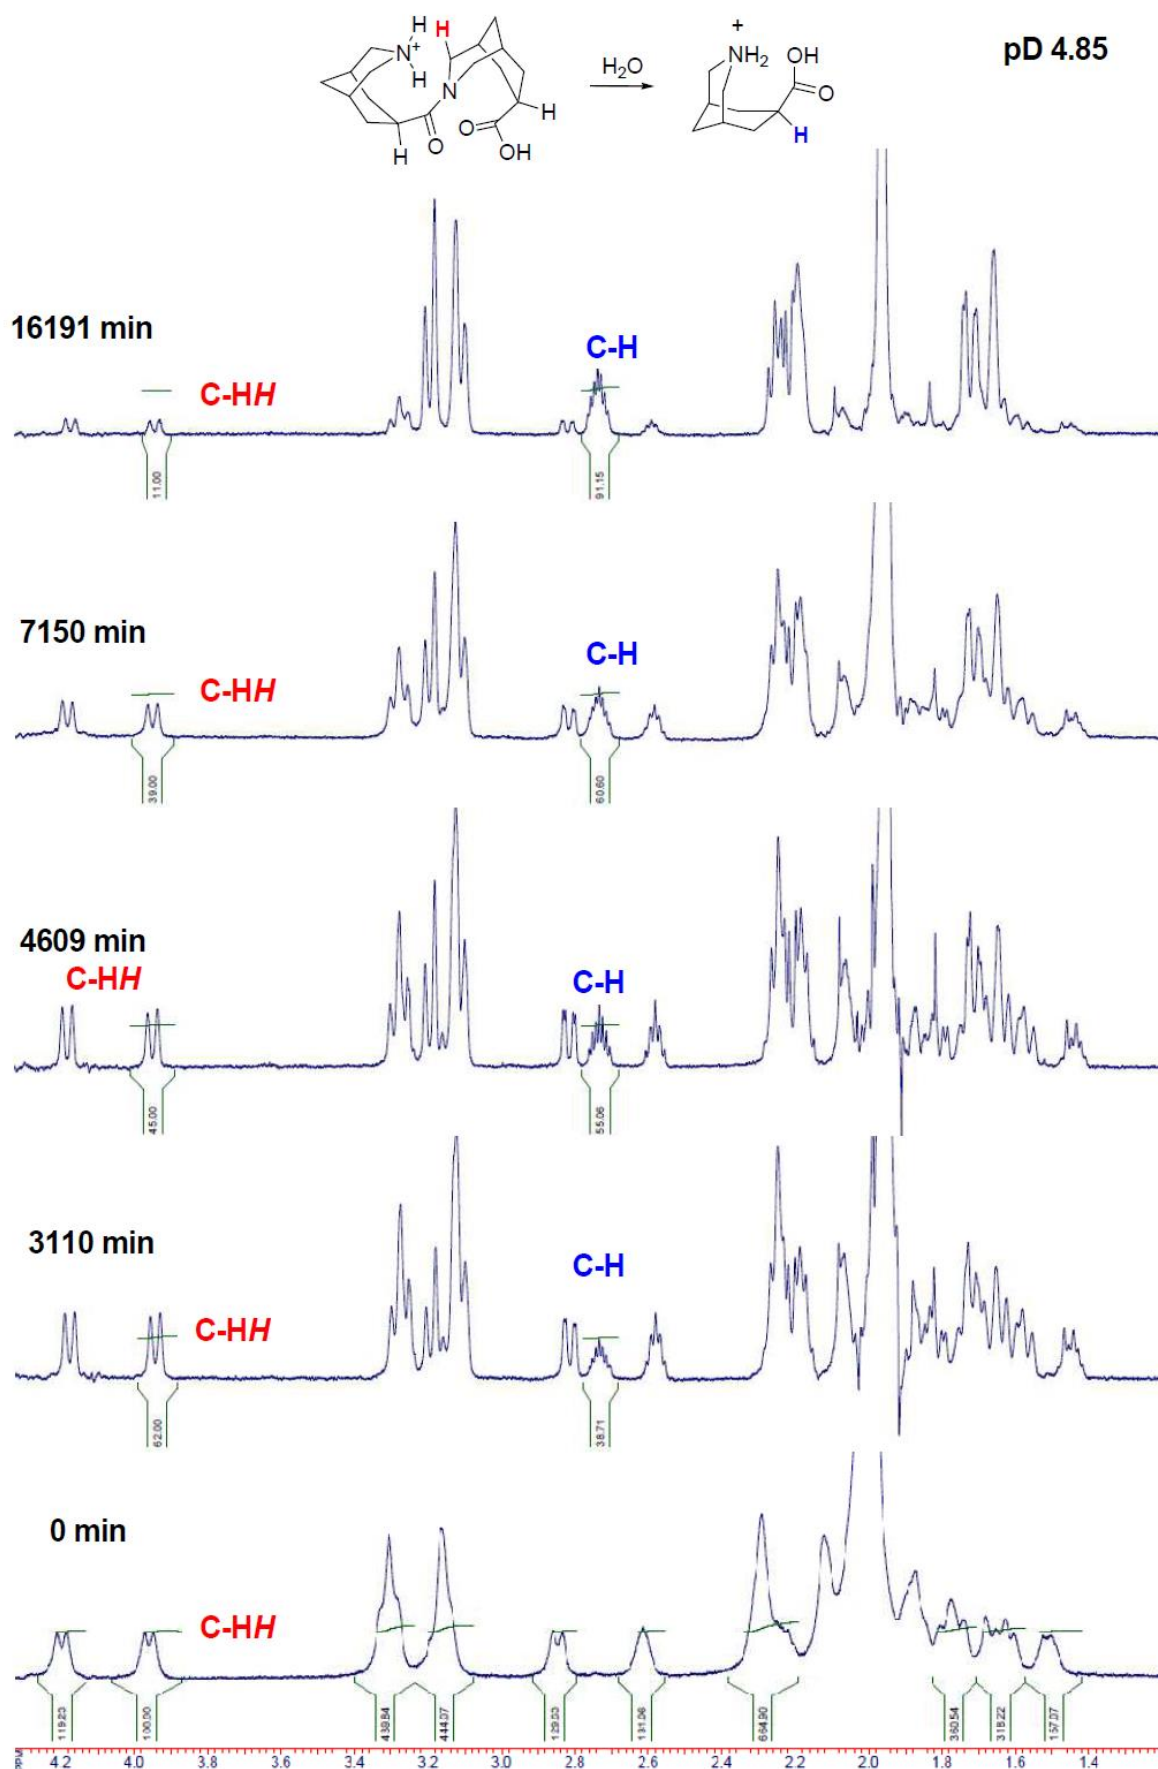

**Figure S40.** Representative spectral data set for hydrolysis of 2HCl in acetate D<sub>2</sub>O buffer, pD4.85, 23 °C.

# Kinetic data on the hydrolysis of 2HCl in phosphateD<sub>2</sub>O buffer, pD6.68.

**Table S5.** Molar percent of 2HCl vs time (min) in phosphate buffer (pD6.68, 23 °C)

|                 |     |    |     |      |      |      |      |       |       |
|-----------------|-----|----|-----|------|------|------|------|-------|-------|
| Time, min       | 0   | 60 | 313 | 1745 | 3302 | 5871 | 9645 | 11844 | 14884 |
| Molar % of 2HCl | 100 | 98 | 96  | 69   | 56   | 32   | 28   | 17    | 12    |

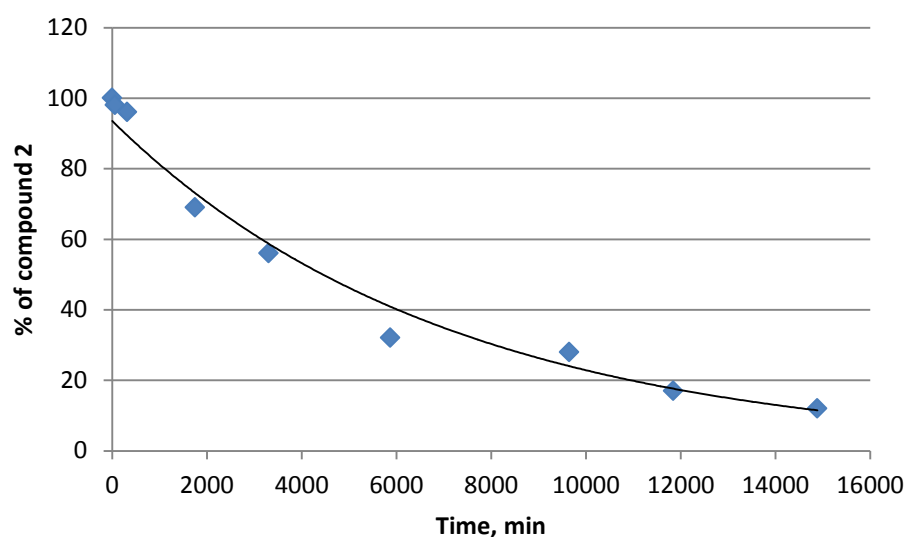

**Figure S41.** Exponential fit of the data (Table S5).

**Table S6.** Fitting parameters and corresponding kinetic constants.

| Equation                        | y0                   | A1                   | t1                       | R <sup>2</sup> | Half-life, t <sub>1/2</sub> , min | k <sub>obs</sub> , min <sup>-1</sup> | log(k <sub>obs</sub> ) |
|---------------------------------|----------------------|----------------------|--------------------------|----------------|-----------------------------------|--------------------------------------|------------------------|
| $y = A1 \cdot \exp(-x/t1) + y0$ | 11,32544±<br>3,65066 | 88,61318±<br>3,75123 | 4520,24104±<br>565,27656 | 0,99053        | 3748                              | 1.849·10 <sup>-4</sup>               | -3.733                 |

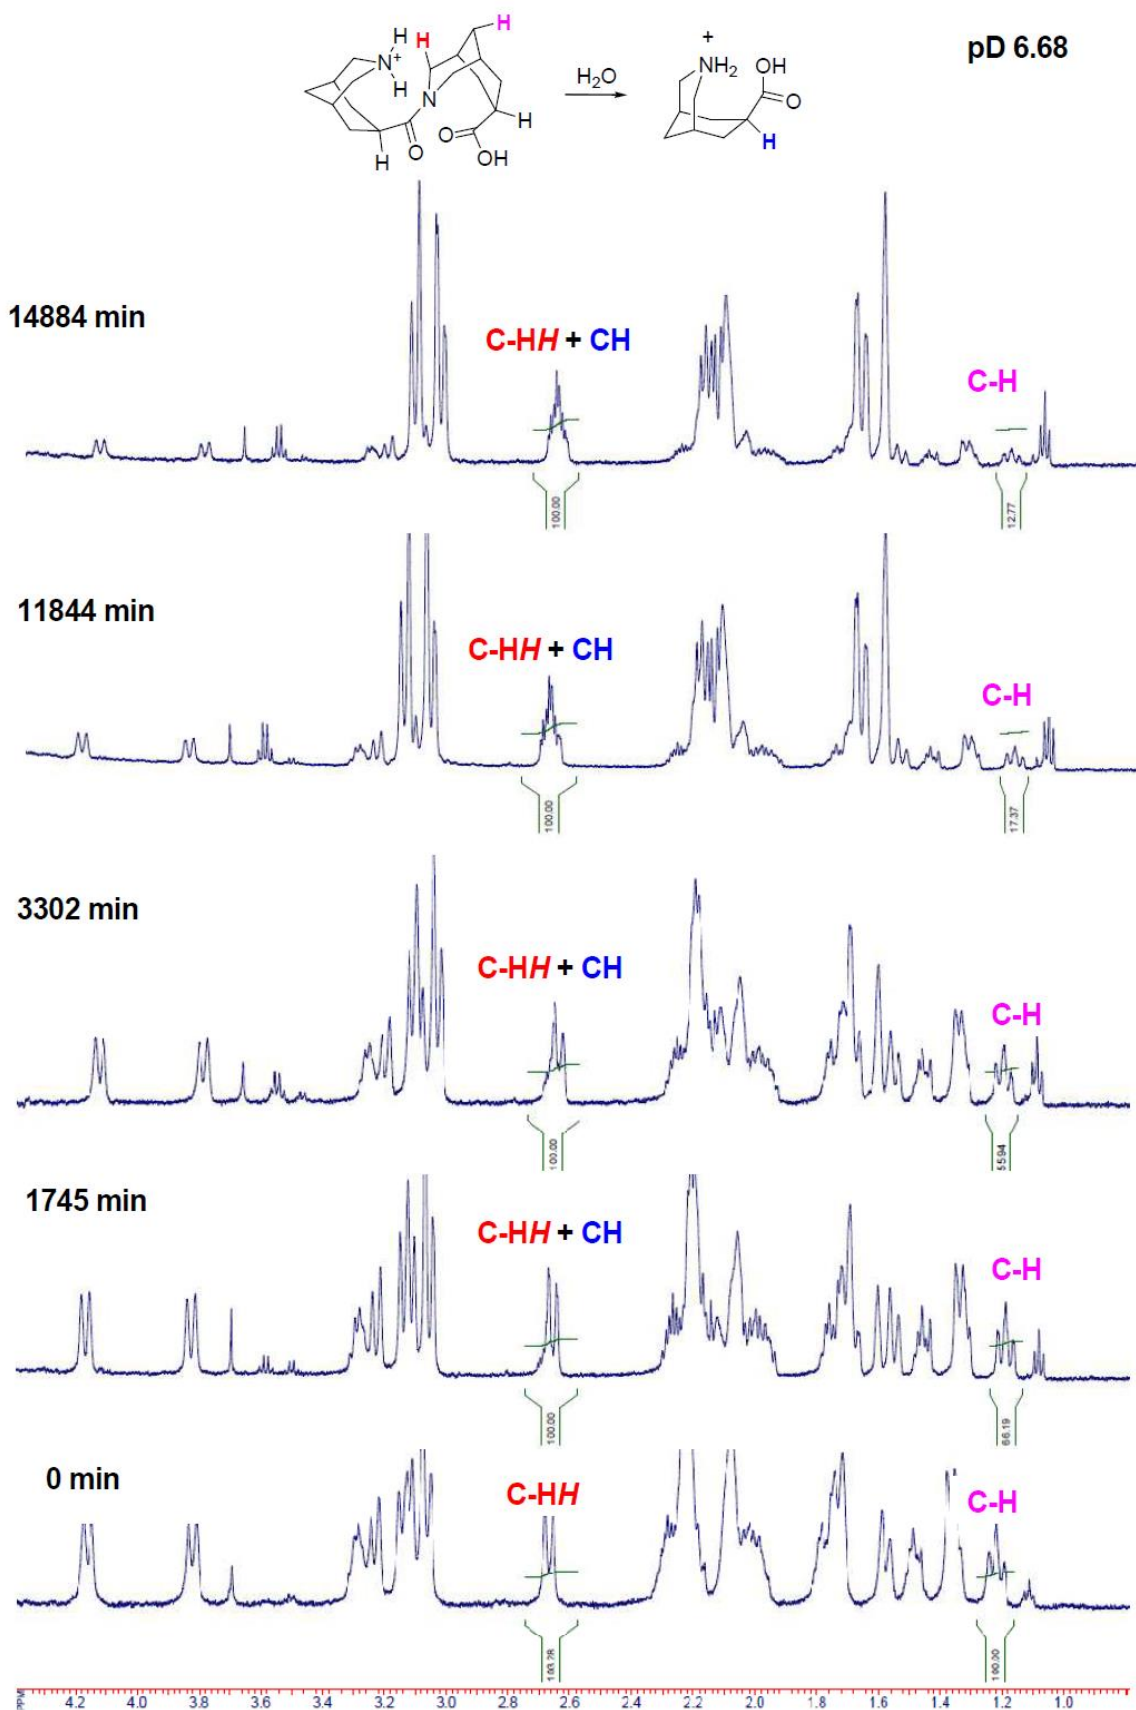

**Figure S42.** Representative spectral data set for hydrolysis of 2-HCl in phosphate D<sub>2</sub>O buffer, pD6.68, 23 °C.

# Kinetic data on the hydrolysis of 2HCl in phosphateD<sub>2</sub>O buffer, pD7.95.

**Table S7.** Molar percent of **2** vs time (min) in phosphate buffer (pD7.95, 23 °C)

|                         |     |     |     |      |      |      |      |       |
|-------------------------|-----|-----|-----|------|------|------|------|-------|
| Time, min               | 0   | 375 | 746 | 1521 | 2924 | 5104 | 9022 | 14445 |
| Molar % of <b>2</b> HCl | 100 | 95  | 93  | 90   | 83   | 78   | 65   | 55    |

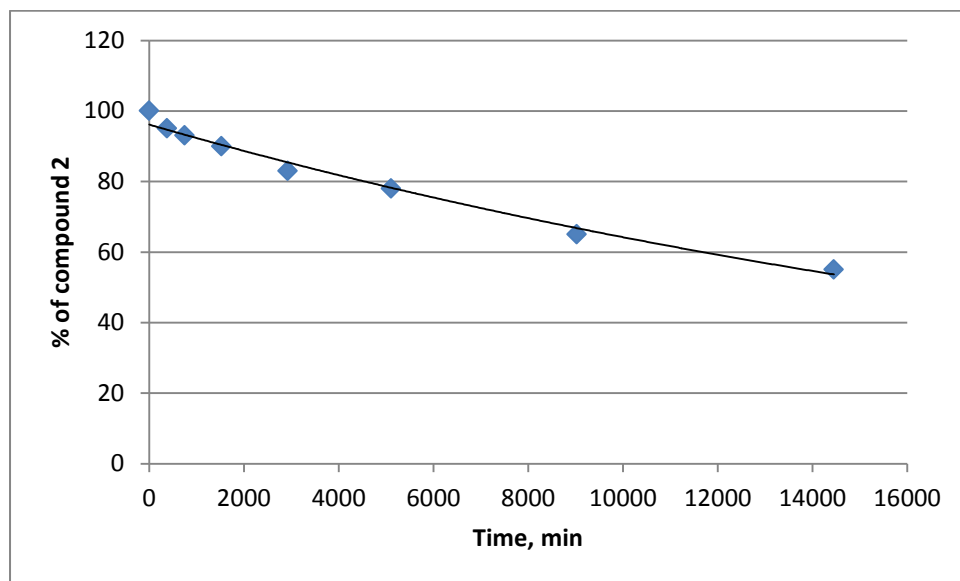

**Figure S43.** Exponential fit of the data (Table S7).

**Table S8.** Fitting parameters and corresponding kinetic constants.

| Equation               | y0                   | A1                | t1                       | R <sup>2</sup> | Half-life, t <sub>1/2</sub> , min | k <sub>obs</sub> , min <sup>-1</sup> | log(k <sub>obs</sub> ) |
|------------------------|----------------------|-------------------|--------------------------|----------------|-----------------------------------|--------------------------------------|------------------------|
| y = A1·exp(-x/t1) + y0 | 39,32703±<br>7,62041 | 58,542±<br>7,2248 | 11049,631±<br>2505,00153 | 0,99065        | 18802                             | 3.686·10 <sup>-5</sup>               | -4.433                 |

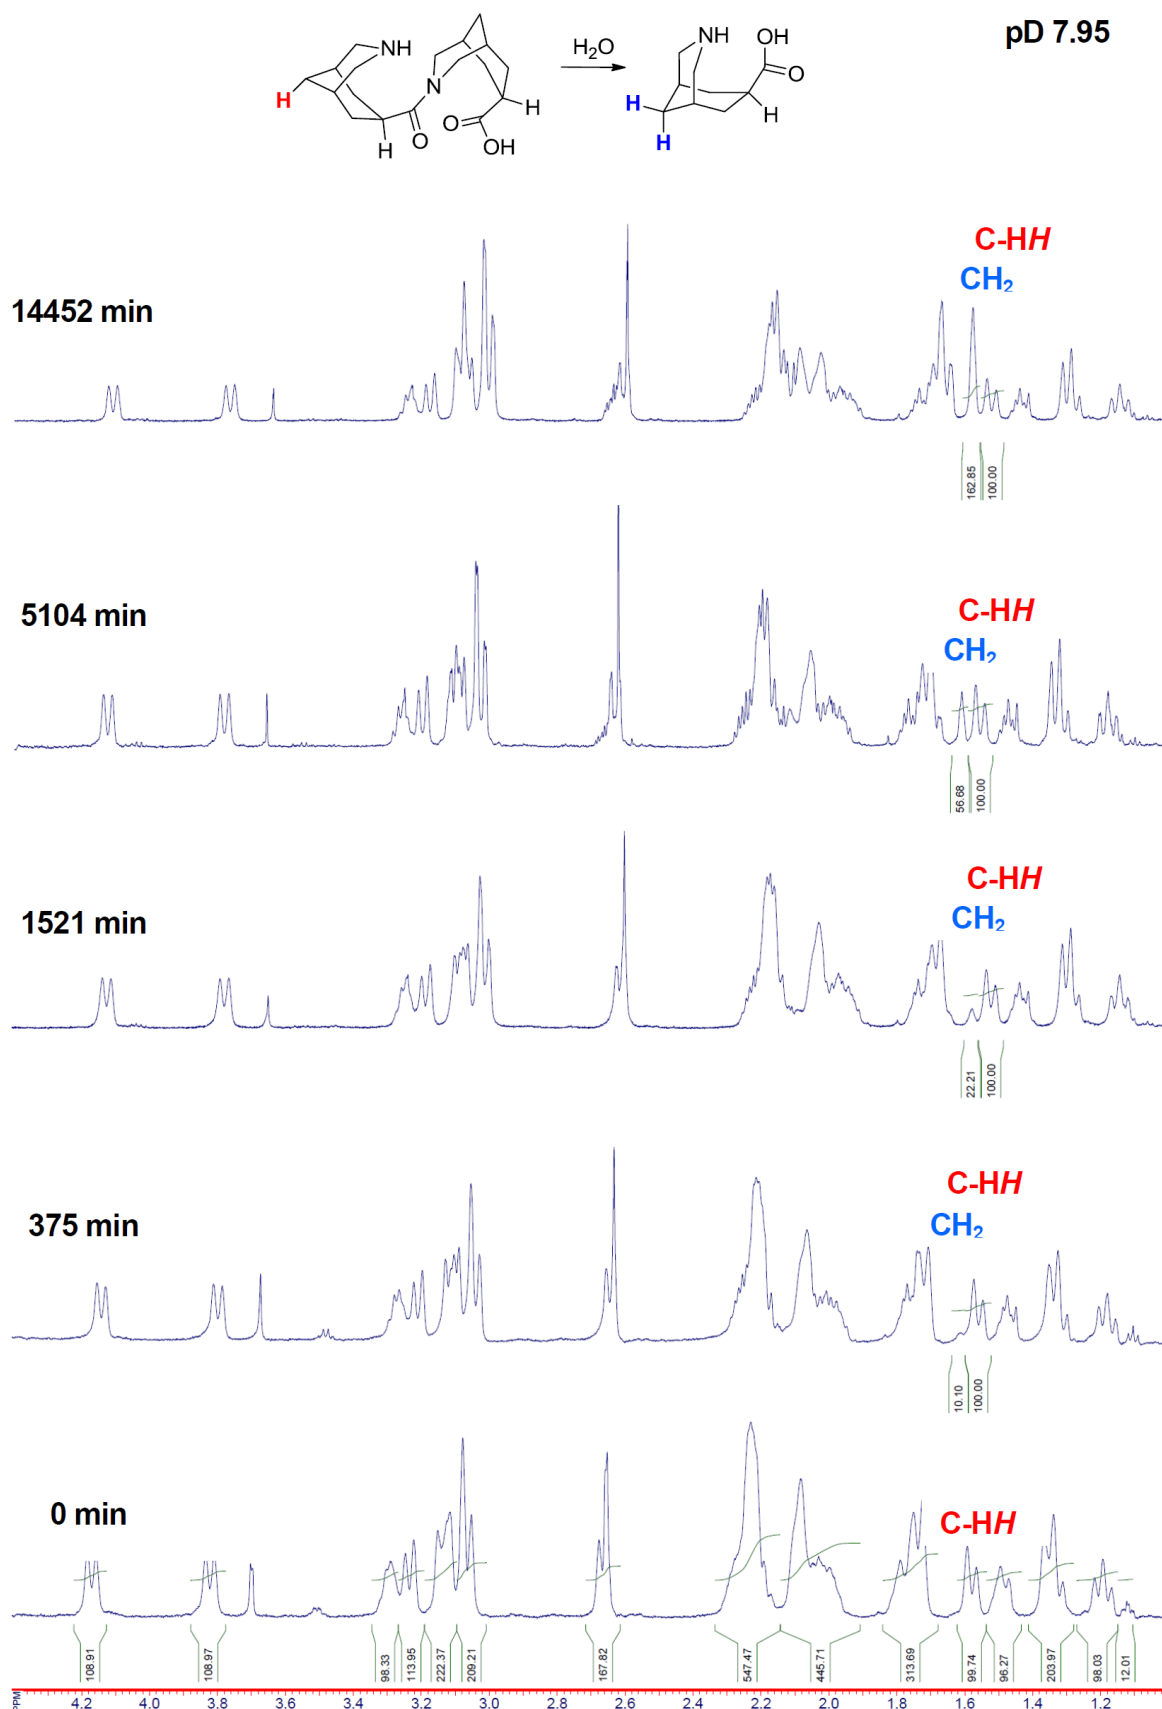

**Figure S44.** Representative spectral data set for hydrolysis of 2-HCl in phosphate D<sub>2</sub>O buffer, pD7.95, 23 °C.

# Kinetic data on the hydrolysis of 2HCl in carbonate D<sub>2</sub>O buffer, pD 9.45.

**Table S9.** Molar percent of **2** vs time (min) in carbonate buffer (pD 9.45, 23 °C)

|                         |     |      |      |      |      |      |       |       |       |
|-------------------------|-----|------|------|------|------|------|-------|-------|-------|
| Time, min               | 0   | 1932 | 2864 | 6009 | 6780 | 8185 | 10368 | 14287 | 19713 |
| Molar % of <b>2</b> HCl | 100 | 97.5 | 97   | 96   | 93   | 92   | 90    | 85    | 83    |

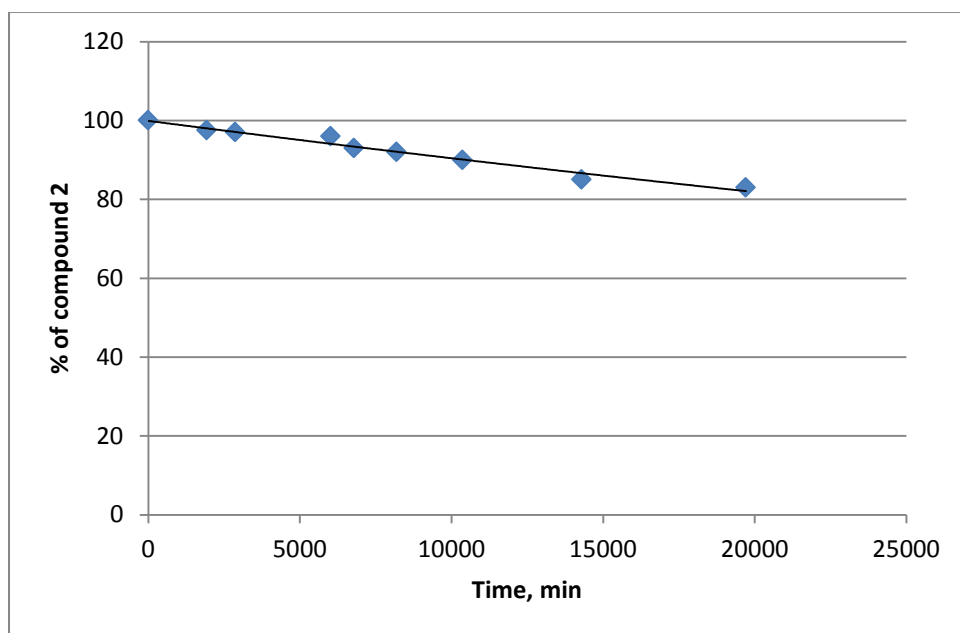

**Figure S45.** Exponential fit of the data (Table S9).

**Table S10.** Fitting parameters and corresponding kinetic constants.

| Equation              | y0                    | A1                   | t1                      | R <sup>2</sup> | Half-life, t <sub>1/2</sub> , min | k <sub>obs</sub> , min <sup>-1</sup> | log(k <sub>obs</sub> ) |
|-----------------------|-----------------------|----------------------|-------------------------|----------------|-----------------------------------|--------------------------------------|------------------------|
| y = A1exp(-x/t1) + y0 | 37,98426±<br>69,45674 | 62,1325±<br>68,92624 | 58252,386±<br>76398,515 | 0,96279        | 91125                             | 7.605·10 <sup>-6</sup>               | -5.119                 |

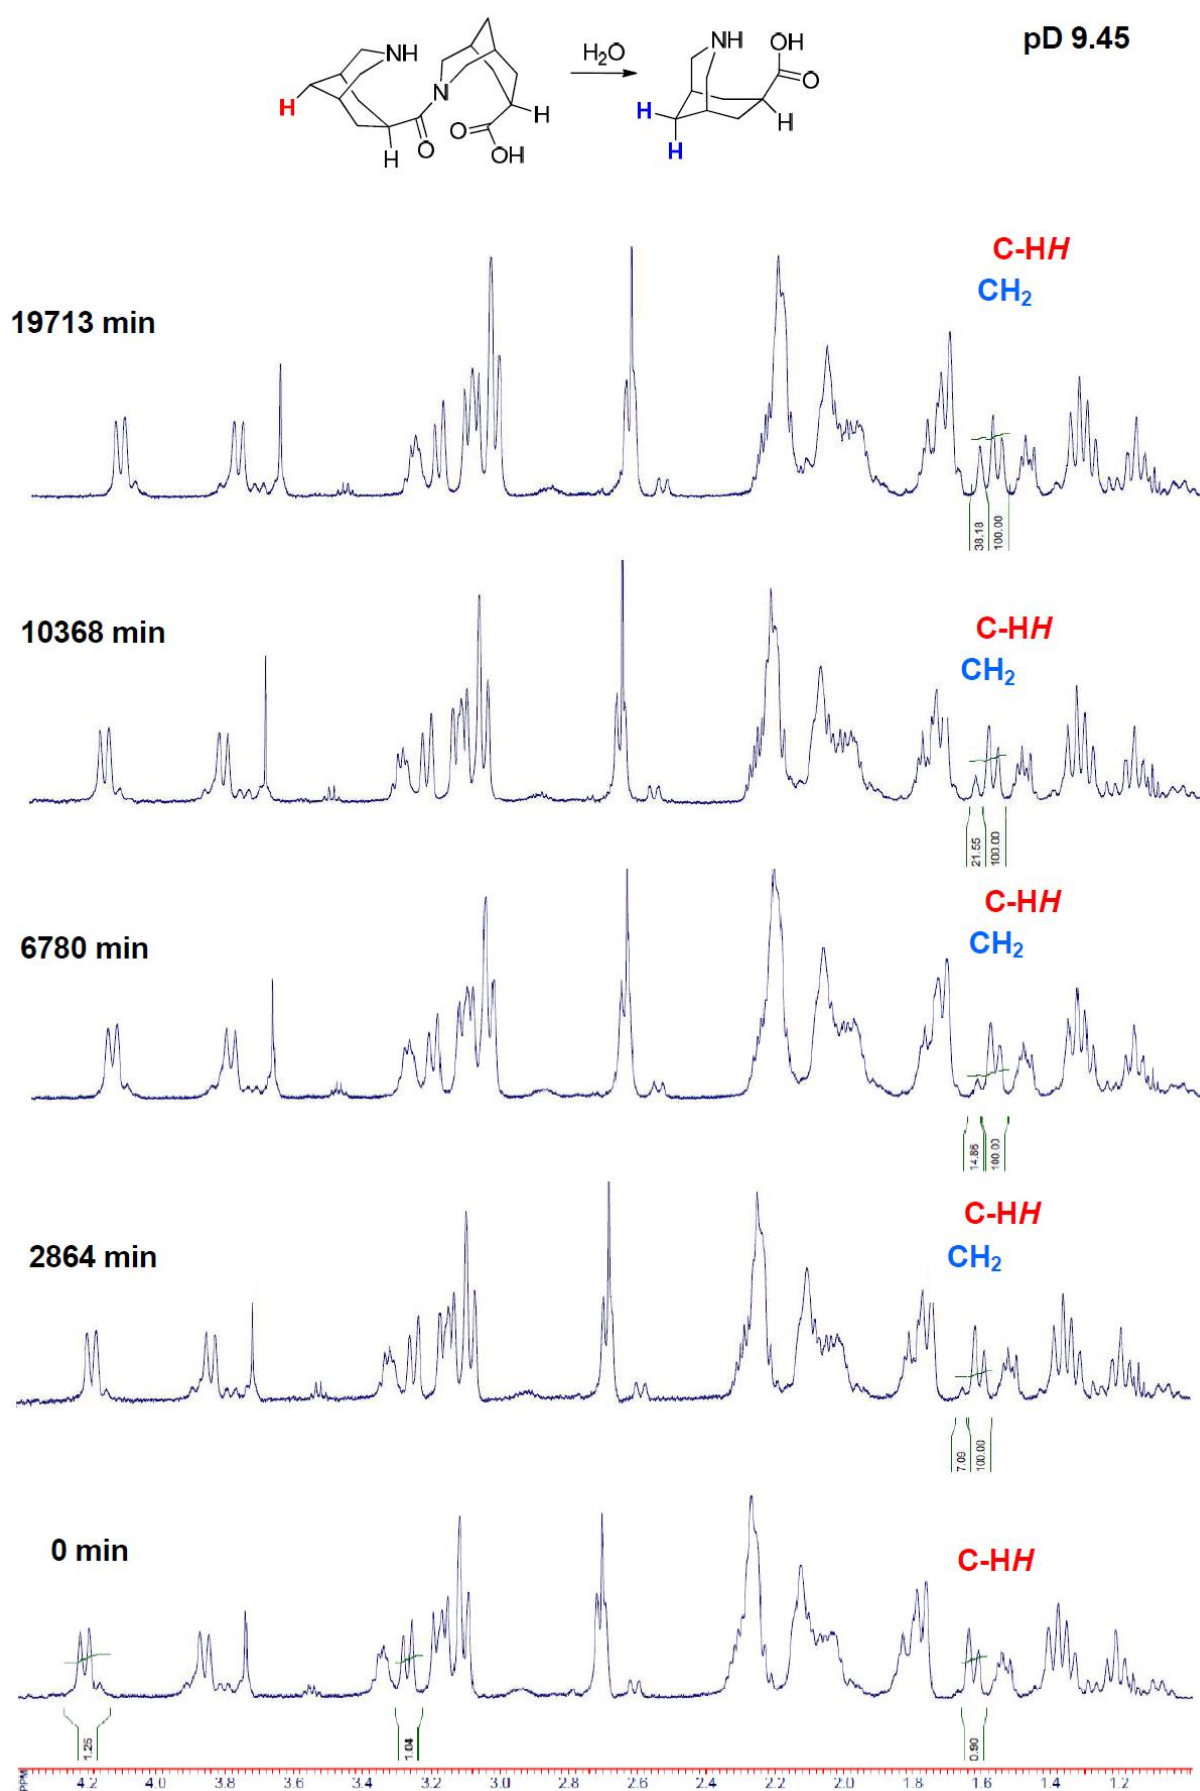

**Figure S46.** Representative spectral data set for hydrolysis of **2**HCl in phosphate D<sub>2</sub>O buffer, pD 9.45, 23 °C.

# Kinetic data on the hydrolysis of 2HCl in carbonate D<sub>2</sub>O buffer, pD 10.68.

**Table S11.** Molar percent of **2** vs time (min) in carbonate buffer (pD 10.68, 23 °C)

|                         |     |      |      |       |
|-------------------------|-----|------|------|-------|
| Time, min               | 0   | 1925 | 2863 | 19625 |
| Molar % of <b>2</b> HCl | 100 | 99   | 98   | 88    |

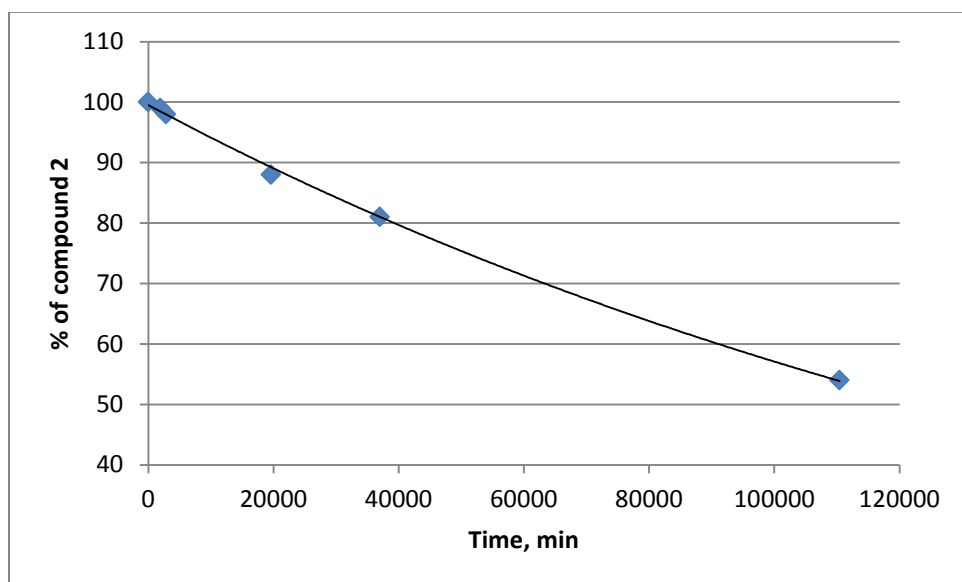

**Figure S47.** Exponential fit of the data (Table S11).

**Table S12.** Fitting parameters and corresponding kinetic constants.

| Equation                  | y0                   | A1                   | t1                          | R <sup>2</sup> | Half-life, t <sub>1/2</sub> , min | k <sub>obs</sub> , min <sup>-1</sup> | log(k <sub>obs</sub> ) |
|---------------------------|----------------------|----------------------|-----------------------------|----------------|-----------------------------------|--------------------------------------|------------------------|
| $y = A1 \exp(-x/t1) + y0$ | 15,58528±<br>9,53246 | 84,25563±<br>9,34923 | 140851,4166±<br>23258,65209 | 0,9986         | 126114                            | ~5.496·10 <sup>-6</sup>              | -5.260                 |



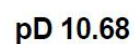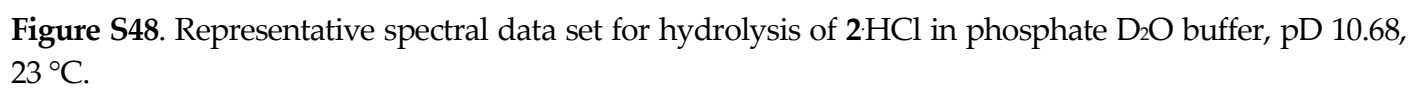

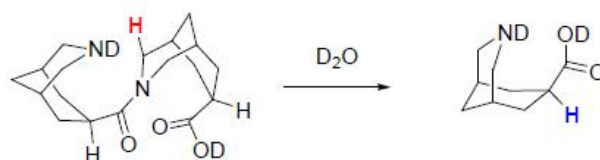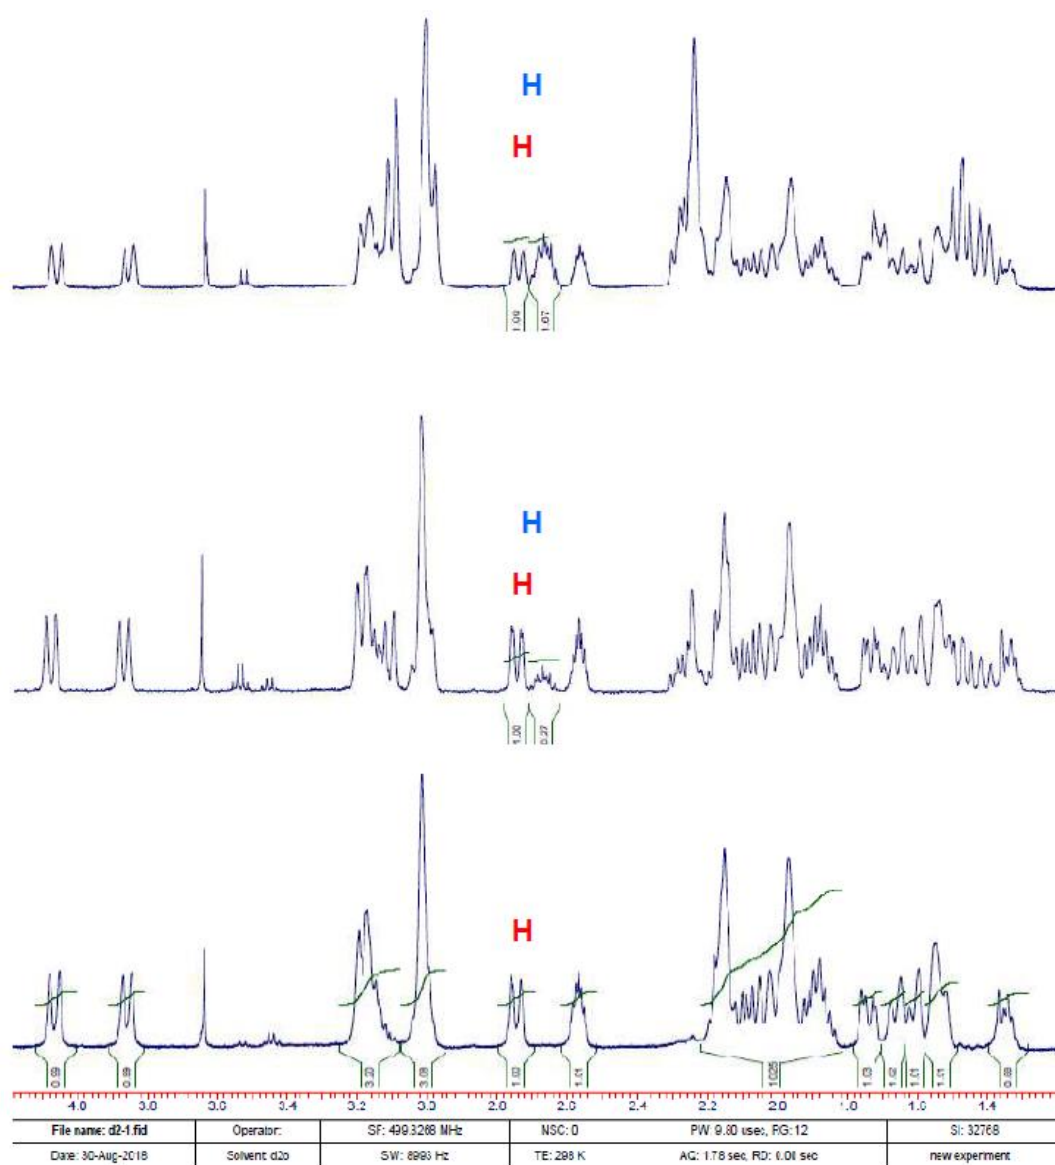

**Figure S49.** Representative  $^1\text{H}$ -NMR spectral data set for hydrolysis of  $2\text{HCl}$  in  $\text{D}_2\text{O}$  (experiment run for estimation of the isotope kinetic effect),  $23^\circ\text{C}$ .

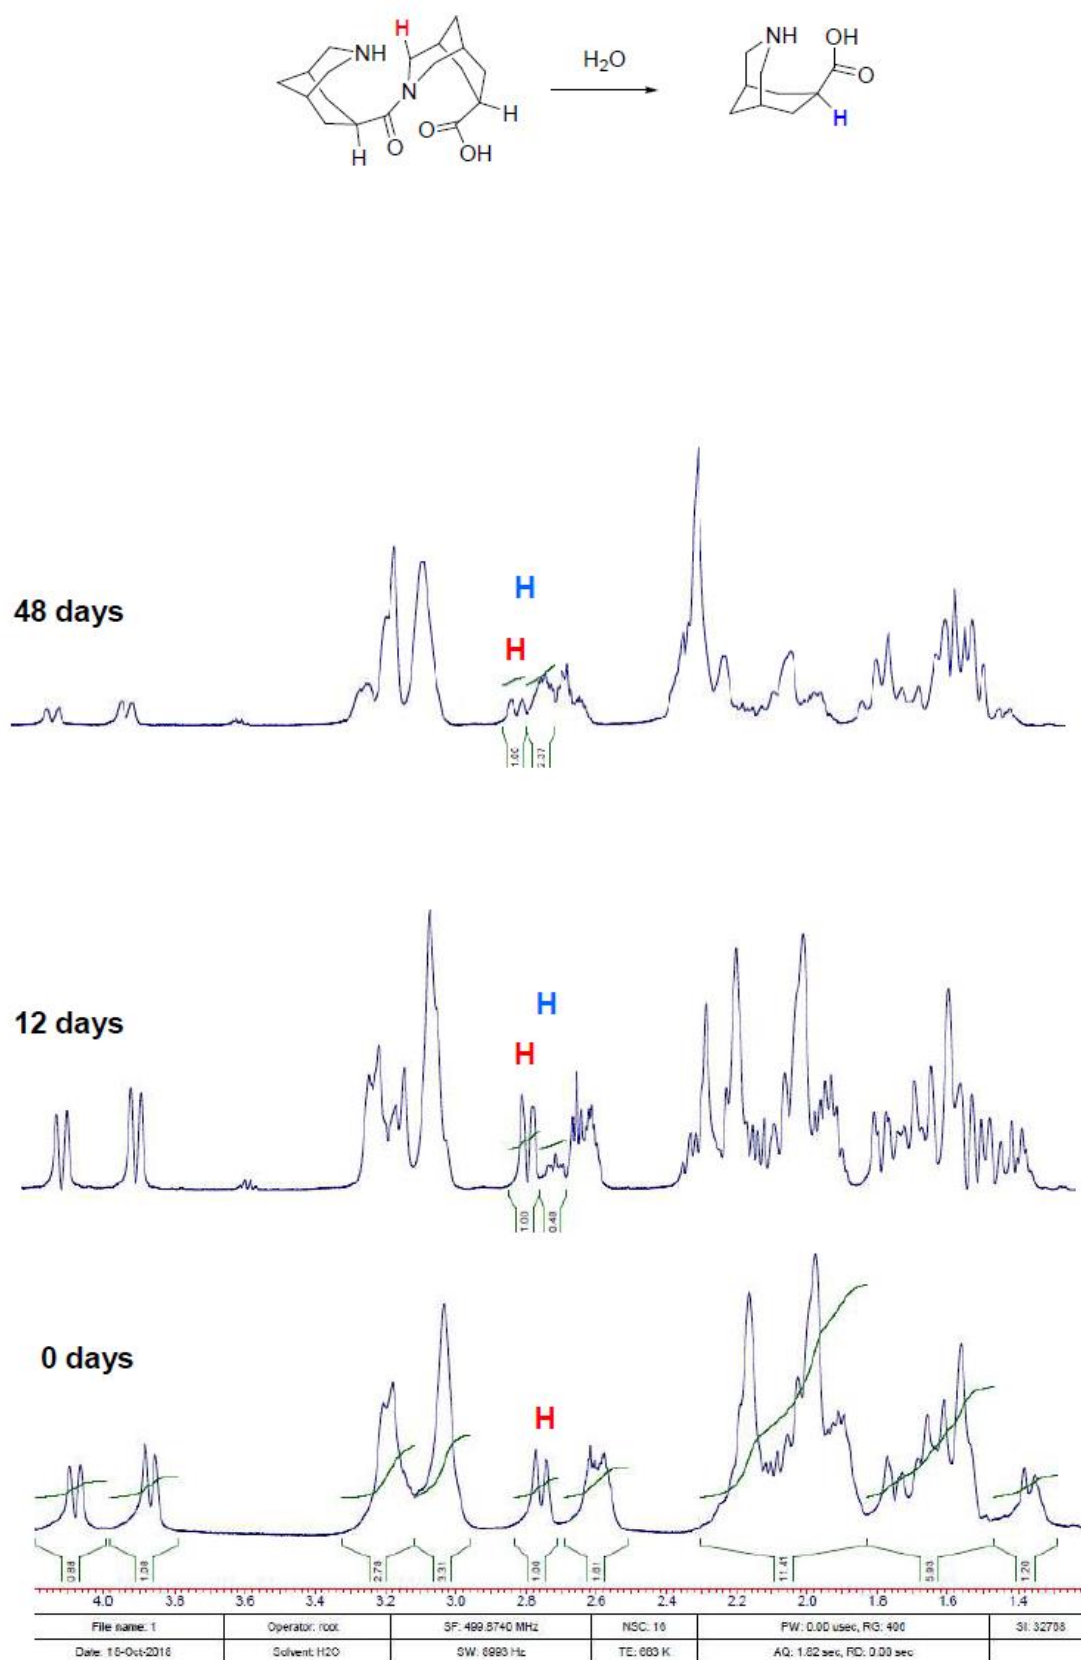

**Figure S50.** Representative  $^1\text{H}$ -NMR spectral data set for hydrolysis of **2HCl** in  $\text{H}_2\text{O}$  (experiment run for estimation of the isotope kinetic effect), 23  $^\circ\text{C}$ .
